# Supplementary material for: Identification of key genes and crucial pathways for major depressive disorder using peripheral blood samples and chronic unpredictable mild stress rat models
Source: PeerJ journal article supplement (doi:10.7717/peerj.11694), 2021-08-03
Supplement: the_raw_data_of_datasets.csv [file the_raw_data_of_datasets.csv]

id	baseMean	log2FoldChange	lfcSE	stat	pvalue	padj
ENSG00000000003.13	4391.95530425373	0.184730614945186	0.487878888233986	0.378640312996265	0.704954981842479	0.88757064526378
ENSG00000000005.5	3.18739306369317	0.573159969122443	1.33500383959067	0.429332075403005	0.667681577453637	0.869627252366552
ENSG00000000419.11	1080.54721869086	-0.380450307807083	0.391559783286136	-0.971627639116005	0.331235827244474	0.658767302951334
ENSG00000000457.12	350.92344176146	0.633086678473009	0.521655749814924	1.21361008423202	0.224896654401349	0.55371740965634
ENSG00000000460.15	175.379707827437	-0.0152721311331702	0.747335795105556	-0.0204354337543984	0.983696017698014	0.994365975921158
ENSG00000000938.11	160.384331692013	1.09044374931072	0.464891464789971	2.34558780252799	0.018997103570205	0.146330822908982
ENSG00000000971.14	54637.8981059552	0.914596782190165	0.504094226195356	1.81433695262307	0.0696258657869267	0.307403578300966
ENSG00000001036.12	3270.59120486658	-0.100869175725023	0.557726543079589	-0.180857764394815	0.856479221203557	0.949573379839113
ENSG00000001084.9	3946.01356287014	0.604623989404473	0.491388834182483	1.23043900745197	0.218532753746046	0.545791023975389
ENSG00000001167.13	461.087663393053	-0.285523057899599	0.612358618903045	-0.466267721373913	0.641023880400202	0.858285244949567
ENSG00000001460.16	91.9425199794845	-0.188701526691314	0.703484044261686	-0.268238531108916	0.788515717827473	0.924216699578306
ENSG00000001461.15	274.689684925905	0.656197459149961	0.633851773797488	1.03525380266525	0.300550398292684	0.632457029068881
ENSG00000001497.15	1591.15212115763	-0.456806196193617	0.425471992015878	-1.07364575052115	0.282981484206106	0.615105334996283
ENSG00000001561.6	383.219114474646	-0.0136089813097307	0.790750561055322	-0.0172102075926047	0.986268918914662	0.994889830052655
ENSG00000001617.10	471.473335922008	-1.19278668003592	0.47082791460688	-2.53338139696293	0.0112967962399197	0.10605594600662
ENSG00000001626.13	128.639599180696	8.79315596679005	1.28614927259553	6.83680825713558	8.09770067119953e-12	3.58546354617031e-09
ENSG00000001629.8	508.456979054995	0.617766702643632	0.544816442172145	1.13389878649888	0.256837006213138	0.588074322647384
ENSG00000001630.14	225.50687420646	0.754841374511733	0.640679138745603	1.17818940693098	0.238721104704271	0.569278202644961
ENSG00000001631.13	427.349378672066	1.06579003025211	0.626015108132022	1.70249889564541	0.0886618853214388	0.345413586628468
ENSG00000002016.15	115.143454841234	0.265326188026784	0.738643803140469	0.3592072212597	0.719440074868139	0.893615134761102
ENSG00000002079.11	2.5930877761304	-0.2877266066496	2.08741405488223	-0.137838779985523	0.890367834875768
ENSG00000002330.12	2079.16277298327	-0.422527708461423	0.519077858610582	-0.813996785746948	0.41564679232946	0.725780598357416
ENSG00000002549.11	7787.69611794971	0.21448462195964	0.474187201621044	0.452320562905133	0.651038064430548	0.862853521467994
ENSG00000002586.16	6862.95821745937	0.494091931914285	0.516303261884386	0.9569800704163	0.338577314319998	0.663874686984788
ENSG00000002587.8	46.4857679661882	-0.43645963950575	0.751517905923751	-0.580770778800356	0.561394951710843	0.81856541881127
ENSG00000002726.18	271.337641153196	1.72528488839981	1.44094174578817	1.19733146287334	0.23117738575724	0.560478021035298
ENSG00000002745.11	1.69810007029634	-0.0741992522544177	1.79697903016595	-0.0412911063561858	0.967063823124881
ENSG00000002746.13	14.0593470775558	-0.36295936243628	1.26189517566459	-0.287630359031307	0.77362970333263	0.918098131687164
ENSG00000002822.14	1207.59868121598	0.195967224782806	0.46058642548939	0.425473296514512	0.670491683989035	0.871129263777837
ENSG00000002834.16	6688.50732092656	-0.447511784892348	0.385279427849566	-1.16152525295765	0.245428359656956	0.576340912557346
ENSG00000002919.13	812.675306304253	-0.724493460128352	0.398996756751786	-1.81578784255396	0.069402922930899	0.307246433619163
ENSG00000002933.6	38035.2488896389	0.554401344629234	0.562027922957347	0.98643025014134	0.32392202693369	0.652414806568264
ENSG00000003056.6	713.607309332475	1.12132122504281	0.642580088766471	1.74502952183806	0.0809797302608322	0.332613275801521
ENSG00000003096.12	138.351605576355	-0.0502612607758527	0.628761129480719	-0.0799369719584327	0.936287384531718	0.978265884652066
ENSG00000003137.7	28.0578604558123	1.86894068648879	0.975950941415585	1.91499450144282	0.055493204845161	0.27113137213074
ENSG00000003147.16	143.211071337922	0.0883882067530058	0.774903436335409	0.114063511153082	0.909187447274205	0.971535783805659
ENSG00000003249.12	1160.11294269617	-2.47143102289833	0.871327130107726	-2.8363985666242	0.00456254685793193	0.0572968282115387
ENSG00000003393.13	1038.46621656415	0.734460373456495	0.492240866437864	1.49207516793855	0.135679440870828	0.432926675699864
ENSG00000003400.13	382.738012629197	0.361961074392554	0.465250188801631	0.777992321346232	0.436573540007853	0.740892117392632
ENSG00000003402.18	3025.6833742503	0.148314360423395	0.39165482626111	0.378686410784879	0.704920745742032	0.88757064526378
ENSG00000003436.13	14320.2240355185	-0.312356683453057	0.59300423466681	-0.526736008265708	0.598376926484582	0.836685076972877
ENSG00000003509.14	499.299542678157	-0.257698320828207	0.451463509928816	-0.570806532888648	0.56813079405009	0.822182878049009
ENSG00000003756.15	1407.67789338693	0.0844526281814365	0.387998819395723	0.217662075139725	0.82769241483805	0.937822951166914
ENSG00000003987.12	55.1692210053636	-0.739638226436956	0.984388814295185	-0.751367971370674	0.452431232743519	0.752189773449839
ENSG00000003989.15	14428.6357264099	1.98567515996627	1.04169762011632	1.90619151049279	0.0566253632823394	0.273617791040899
ENSG00000004059.9	4150.21588244897	-0.282064306511823	0.452191783333543	-0.623771410511828	0.532777717791907	0.800605718604601
ENSG00000004139.12	61.5008312964162	-0.0120098574125745	0.669428830866247	-0.01794045439757	0.985686356257843	0.994697150866729
ENSG00000004142.10	11036.3309502158	-0.189902328833144	0.440492552532711	-0.431113597134067	0.666385774428842	0.869406930189334
ENSG00000004399.11	1819.96615254842	-0.238739498863109	0.52873116969997	-0.451532863096727	0.651605545172162	0.863355796331673
ENSG00000004455.15	5089.08457886039	0.303358557214191	0.56335505581155	0.538485550248916	0.590241878285708	0.832794939928901
ENSG00000004468.11	122.225189526825	2.28259681747262	0.696097619499878	3.27913320420861	0.00104126473791699	0.0205188735275632
ENSG00000004478.7	5959.1403438576	-0.774465209003998	0.504451473282345	-1.53526206190803	0.124719469103134	0.413305880809774
ENSG00000004487.14	1078.27069467945	0.459095494383231	0.432834366626808	1.06067246452975	0.288838777841648	0.620582899985383
ENSG00000004534.13	1262.05171566253	0.138931579946641	0.422882419552224	0.328534773551832	0.742507356513988	0.904195653529153
ENSG00000004660.13	60.2227787635161	-0.181408349042024	0.609035376413369	-0.297861759870739	0.765808675073823	0.913965840497369
ENSG00000004700.14	160.543674084088	0.766835228177661	0.688061873342302	1.11448585932063	0.265070807532038	0.596512419895767
ENSG00000004766.14	330.599559207717	-0.00478380386267445	0.483431526560291	-0.00989551487614419	0.992104650313045	0.997114119293641
ENSG00000004776.10	10376.3374532735	-5.0842867534248	2.17200785014719	-2.34082337827658
ENSG00000004777.17	67.5420045243283	0.0758800747026976	0.575952396970607	0.13174712893255	0.89518430689012	0.965750903306236
ENSG00000004779.8	3919.59931315638	-0.352693537545452	0.512143067000797	-0.688662134217475	0.491035910256301	0.774894337356216
ENSG00000004799.7	8817.57272498231	0.855074703065094	1.13855637481155	0.751016569738698
ENSG00000004809.12	1.27688845258654	-2.45340346458022	3.39660084528078	-0.722311386099124	0.470103054101292
ENSG00000004838.12	12.7528532219194	-0.420819417193392	0.796286900274606	-0.528477131858215	0.597168215055571	0.836455769523675
ENSG00000004846.15	1.35525145974638	1.11185648016652	2.83010833954087	0.392867108524507	0.694417635916741
ENSG00000004848.6	0.417735893897183	2.37815699527225	4.03038802348455	0.590056585473914	0.555152713744694
ENSG00000004864.12	5075.39839664026	1.06977830342766	0.562751353142505	1.9009786426169	0.0573048101148045	0.275672984534545
ENSG00000004866.17	1662.98894875677	0.459899818651985	0.677858550584717	0.67845986195096	0.497480164923191	0.778739513576736
ENSG00000004897.10	1049.74256669142	-0.0555150547226354	0.398779298997346	-0.139212478837837	0.889282247838216	0.963392802171965
ENSG00000004939.12	3.32316379603965	0.525334799516079	2.01961190021617	0.260116708294227	0.794773750066275	0.926072726459509
ENSG00000004948.12	1.09796237733357	-0.267848965218388	2.56821233389094	-0.104293933053653	0.916936092380402
ENSG00000004961.13	792.392416198312	-0.353530883571885	0.428347839082807	-0.825335980050413	0.409180870133688	0.720848341462319
ENSG00000004975.10	570.883969342537	-0.695817588057005	0.445261295462037	-1.5627174316487	0.118119072448587	0.40196190395685
ENSG00000005001.8	19.1839057769443	4.98892438032137	1.29893998242063	3.84076589206553	0.000122651042195538	0.00411288564370075
ENSG00000005007.11	3033.08843261965	-0.51956437086733	0.489912088456357	-1.06052572106233	0.288905494813584	0.620630949233325
ENSG00000005020.11	434.988715651717	0.0851357405320866	0.643858005194019	0.132227509552253	0.894804342682018	0.965696460059835
ENSG00000005022.5	13243.333391542	-0.285797718926641	0.471106077690034	-0.606652583061521	0.544081496131079	0.807358740172348
ENSG00000005059.14	101.440673015092	-0.207357044834279	0.69711700445491	-0.297449414530371	0.76612342247611	0.914190615666136
ENSG00000005073.5	0.708802102567285	-1.43430411679088	3.37471701199332	-0.4250146343215	0.670826006591106
ENSG00000005075.14	2245.88293710641	-0.340536705398647	0.544177416000589	-0.625782502885563	0.531457609904991	0.799896240339833
ENSG00000005100.11	493.804515665055	-0.287000654771842	0.444280261434941	-0.645990109587324	0.518285760672242	0.792216983482103
ENSG00000005102.11	8.61005461601243	0.413781571591832	1.18680935120944	0.348650413960895	0.727351774855544	0.897701844044692
ENSG00000005108.14	61.8521746616906	0.665347853233655	0.628660675857391	1.05835767813253	0.289892406420249	0.621615502045238
ENSG00000005156.10	485.082715699408	-0.507385442434009	0.408236172580771	-1.2428723285995	0.213914884050137	0.539976419354482
ENSG00000005175.8	514.487115494012	0.0549883918422156	0.421585014156617	0.130432510634231	0.896224246518895	0.96623341544792
ENSG00000005187.10	2279.36237402539	2.9127700475247	0.545647878037349	5.33818633731646	9.38809479559453e-08	1.34890135553125e-05
ENSG00000005189.18	112.408114689313	-0.484752321245272	0.587604426614979	-0.824963698857396	0.409392200363593	0.721013399316763
ENSG00000005194.13	1154.57377579108	-0.603621276681281	0.52596926570221	-1.14763602370454	0.251118851959562	0.58226724506943
ENSG00000005206.15	1029.63802482065	-0.221974723083196	0.466264869198242	-0.476070014592541	0.634024498524186	0.854690518380583
ENSG00000005238.18	407.210116909899	0.389084342167348	0.42679661436569	0.911638773764898	0.361958904179932	0.683737272336653
ENSG00000005243.8	1415.92115734159	-0.0490942691337884	0.547789951345503	-0.0896224346817629	0.928587255848937	0.975927943927124
ENSG00000005249.11	78.7727934966445	3.60369967553738	0.619500849937238	5.81710206838695	5.98765837047755e-09	1.15989496433822e-06
ENSG00000005302.16	485.635458904437	-0.262600258046196	0.413261036711347	-0.635434349523774	0.525145171264331	0.796250586047308
ENSG00000005339.11	1679.77468884861	0.379278393454057	0.484663302735466	0.782560576204943	0.433885200010034	0.738918454866248
ENSG00000005379.14	129.303183579143	1.51872421315049	0.683600870604655	2.22165342154576	0.0263067366233838	0.17795615216365
ENSG00000005381.7	9.7206333921939	-0.112069534693577	1.74294271587659	-0.0642990350013961	0.94873212182402	0.982317098008768
ENSG00000005421.7	26840.1648794544	1.15411712707142	0.729139138966968	1.58284895898821	0.113455894624266	0.393405640046041
ENSG00000005436.12	627.426674163244	0.0554178965582283	0.419237049779749	0.132187497711242	0.894835989723586	0.965696460059835
ENSG00000005448.15	144.183637564517	0.481462395382035	0.740294577801133	0.650365962171578	0.515455858398411	0.790427346008718
ENSG00000005469.10	864.10304576878	1.38408921650752	0.497465652757278	2.78228096520031	0.00539782874091102	0.0645476597505058
ENSG00000005471.14	5971.56735055928	-0.336073867454316	0.873882190032359	-0.384575714309811	0.700551789989372	0.885581913091657
ENSG00000005483.18	602.914645807361	0.988698641467055	0.54656447559856	1.80893322857162	0.0704613773662613	0.308959184183186
ENSG00000005486.15	4200.38873271486	-0.495853253694681	0.582431142570757	-0.851350859272505	0.394574480568235	0.709893257043102
ENSG00000005513.9	5.79917549936173	-1.45412933269765	1.49436985128329	-0.973071914860244	0.330517561327742	0.657941922246692
ENSG00000005700.13	1986.46504041783	0.651409334951537	0.543261770507693	1.19907081689694	0.230500410456439	0.559388915577505
ENSG00000005801.15	286.851405208453	-0.129253142749781	0.409685982761497	-0.315493202570776	0.752387211305555	0.90879595459778
ENSG00000005810.16	659.296744847103	1.73213173883875	0.569477758108114	3.04161438120629	0.00235313142105211	0.0371568699498884
ENSG00000005812.9	936.959859714194	1.62683123428664	0.589878391851297	2.7579095229797	0.00581722965132089	0.0677296606436787
ENSG00000005844.16	1327.40265137239	-0.0578635025876117	0.550037792528465	-0.105199139720235	0.916217793339649	0.973362878251565
ENSG00000005882.10	1434.73292117916	1.44857322708176	0.525381834231579	2.75718179179232	0.00583019281145483	0.0677335800658886
ENSG00000005884.16	286.980562573974	-0.638851553632723	0.558808874226413	-1.14323802483831	0.252939778655109	0.584214736747419
ENSG00000005889.14	584.494480813491	0.662058018425999	0.579985937404158	1.14150701892734	0.253658992811149	0.585266770542278
ENSG00000005893.14	9157.06455542551	0.422327798261804	0.439899245765114	0.960055745326981	0.337027159692237	0.66311247453367
ENSG00000005961.16	6.75787262200793	0.281308722665899	1.45603550282893	0.193201829295608	0.846800906156662	0.946058610923225
ENSG00000005981.11	93.6855279928283	0.206380128121127	1.12834457617044	0.182905233454105	0.854872376469131	0.948838085255604
ENSG00000006007.10	1659.49891205219	0.281368078625644	0.517052359488068	0.544177148527521	0.586319575292906	0.831376734976382
ENSG00000006015.16	2444.32772532906	-0.828732327996175	0.714643926963523	-1.15964370048929	0.246193900854008	0.576765238411462
ENSG00000006016.9	28.661337678331	-0.894036287090864	0.893117874550469	-1.00102832175524	0.316813116213446	0.647121593516329
ENSG00000006025.10	82.9416665529072	0.0195766922505511	0.62482511014818	0.0313314748920836	0.975005189389772	0.99176399621766
ENSG00000006042.10	1337.33319967364	-1.12700325979782	0.673554720409799	-1.6732170759818	0.0942845699372903	0.357060225058379
ENSG00000006047.11	139.66190556612	-2.40908627744411	0.61165296904117	-3.93864887342998	8.1941744400943e-05	0.003023483140345
ENSG00000006059.3	0
ENSG00000006062.12	878.070942233802	-1.18415993317928	0.555113707608938	-2.1331844574328	0.0329095976129706	0.203052031979267
ENSG00000006071.10	12.9853860193114	-1.46521058368665	0.922759965735623	-1.58785668873116	0.112318749200537	0.391310092953569
ENSG00000006116.3	0
ENSG00000006118.13	197.794505251762	-2.21324841105774	0.803547845493495	-2.75434552338135	0.00588096449135119	0.0681588705151471
ENSG00000006125.15	3581.85505487421	-0.424428059203176	0.466280088467143	-0.91024272685211	0.36269451558434	0.684214189122171
ENSG00000006128.10	1.23594376672019	0.227773617410836	2.90693843597798	0.0783551569554331	0.937545543376243
ENSG00000006194.9	796.309061091449	-0.602102254789448	0.436426465690397	-1.37961902433429	0.16770397676998	0.481985094714729
ENSG00000006210.6	1630.59624852644	0.114422651846309	0.416433121022015	0.274768374728435	0.78349419653441	0.922849346583682
ENSG00000006282.18	2609.6477499529	-0.105849811395789	0.637394318033961	-0.166066449607336	0.868104656832932	0.954890894012656
ENSG00000006283.16	1.75031413323835	-2.95912340977889	2.27631227605023	-1.29996373560549	0.193613398620657
ENSG00000006327.12	1854.51053844064	-2.62628158094751	1.04938593093128	-2.50268419228454
ENSG00000006377.10	0.279560071918729	-1.41836371271952	4.04083959979051	-0.351007179991269	0.725582961849053
ENSG00000006432.14	162.748127227082	-1.24942592829665	0.477258623695755	-2.61792216266613	0.00884669823509381	0.0901964120811068
ENSG00000006451.6	1007.61751995241	-0.211860312773092	0.402065071669586	-0.526930409282598	0.598241915633417	0.836685076972877
ENSG00000006453.12	2286.11010898323	0.492810346161405	0.696673027115293	0.707376813771562	0.479332341816944	0.768701043164313
ENSG00000006459.9	467.08324754418	1.00509267029286	0.527919328515591	1.90387549006587	0.056926401906185	0.274400181238967
ENSG00000006468.12	215.14726596593	1.79127607233044	0.69283845437383	2.58541664513895	0.0097261386988806	0.0960921244129843
ENSG00000006530.14	425.22398402132	0.34800328807327	0.476229445222027	0.730747104289245	0.464933638054777	0.760471915426878
ENSG00000006534.14	543.941158232634	-0.998686392704444	0.569180207803117	-1.75460491951944	0.0793269094031171	0.329597351826896
ENSG00000006555.9	250.634876624293	-0.895482885054147	0.553812736364844	-1.61694165961581	0.105890874725112	0.379017496195053
ENSG00000006576.15	280.932395495154	0.481418549853191	0.415530376507647	1.1585640354366	0.246633935696513	0.57717289061283
ENSG00000006606.7	15.7055135169826	-5.09862394027543	1.7245932821581	-2.95642108375556	0.00311231865168197	0.0446297855035637
ENSG00000006607.12	529.73177975604	1.26108387600998	0.555180685238553	2.2714836980831	0.0231177127266194	0.164929229759981
ENSG00000006611.14	213.521489227647	-2.54761762776104	1.30770085398831	-1.94816545388891	0.05139516897019	0.259470399024418
ENSG00000006625.16	924.484184263555	-0.344079199486281	0.443092683834728	-0.776540015304384	0.43743020352279	0.741283539932244
ENSG00000006634.6	109.947712396062	-0.793862797814479	0.536957054722032	-1.47844746769449	0.139288048112339	0.438988014503967
ENSG00000006638.10	250.902441267564	1.48430594097149	0.661666834983363	2.24328296733931	0.024878573021285	0.171790426565818
ENSG00000006652.12	563.188748469358	-0.240068223808986	0.53232167329681	-0.45098337312133	0.652001532505134	0.863498061850286
ENSG00000006659.11	0
ENSG00000006695.9	467.688085364626	-0.356230315429093	0.630908759213589	-0.564630479806818	0.572325129139408	0.824877679177277
ENSG00000006704.9	414.255441284643	-0.435988391724338	0.696111625569529	-0.626319652925824	0.531105298265269	0.799809735669067
ENSG00000006712.13	3470.03934908735	-0.303965005250493	0.500659948465654	-0.607128663241464	0.54376552943608	0.807334894835311
ENSG00000006715.14	1090.90350351935	0.0634756274670152	0.50381571430859	0.125989772975077	0.899740020048419	0.96800354433058
ENSG00000006740.15	286.742953869261	-2.49097889055468	1.12152382772134	-2.22106640000306	0.02634646438769	0.178072551824088
ENSG00000006744.17	2664.53012394663	-0.259211119870186	0.533214454989965	-0.486129206446709	0.626875560494844	0.850672646404813
ENSG00000006747.13	7.05713375120646	-1.45260553509974	1.07862366053102	-1.34672137118206	0.178069986654564	0.494882566523124
ENSG00000006756.14	3169.06955622279	1.38111629933635	0.591413001903974	2.33528227294638	0.0195286796138766	0.148456283427704
ENSG00000006757.10	1024.61521895089	0.690758240353942	0.517467751633682	1.33488171615172	0.181915062813628	0.500465210877897
ENSG00000006788.11	11.2437972372245	-3.42682856040796	1.68970376032578	-2.02806470629339	0.0425536444405365	0.234692471229697
ENSG00000006831.9	5655.63003854313	0.516322336104727	0.64052901578276	0.8060873487109	0.420192485750362	0.729192454885239
ENSG00000006837.10	23.7777868014733	-0.619187636639727	0.672798130211923	-0.920317118664837	0.35740706587716	0.680381126723775
ENSG00000007001.11	116.039909059821	1.18218851425238	0.988624832842017	1.19579083488518	0.231778193384388	0.561444714707033
ENSG00000007038.9	3.69011468429496	3.56593060426687	1.92320482167847	1.85416059905399	0.0637161871529363	0.2926158954306
ENSG00000007047.13	1064.80061495449	-0.675743027728237	0.448405295542457	-1.50699163111078	0.131812802357086	0.425828598110556
ENSG00000007062.10	79.3558612473227	3.5389672772052	1.23323313162791	2.86966607241052	0.00410905489949641	0.0535114376347384
ENSG00000007080.9	3593.80308345488	-1.57849991897462	0.71329869098701	-2.21295782386816	0.0269005535316003	0.17985652062299
ENSG00000007129.16	56.2159626093077	0.999016941190812	0.610752723256935	1.63571426397151	0.101899402773926	0.371877113975288
ENSG00000007168.11	2573.19908880286	-0.111489935742387	0.450678237571416	-0.247382559102868	0.80461217061683	0.931082492597084
ENSG00000007171.15	15.6005977893481	0.190894736628971	0.794751713593128	0.240194180602547	0.810179724857259	0.932996778689123
ENSG00000007174.16	3.59476616496983	1.44347457241098	2.01349089266887	0.716901465840586	0.473434897447741	0.766235537514009
ENSG00000007202.13	2444.05308252842	-0.490503797892013	0.469599470339811	-1.04451522813063	0.296247077464799	0.628594287792301
ENSG00000007216.13	49.3394482500978	1.27739747805409	0.923832329622509	1.38271571268355	0.166752052098448	0.48020341416617
ENSG00000007237.17	140.001586742638	-0.0460880044315799	0.509674463729501	-0.0904263558631812	0.927948413533588	0.975851074734487
ENSG00000007255.9	1622.96160619621	-0.0993593999828037	0.70636954607005	-0.140662066386637	0.888136913711402	0.963065697715043
ENSG00000007264.12	159.662596635007	-0.152232275929457	0.507292514896799	-0.300087762896377	0.764110213104789	0.913449826673783
ENSG00000007306.13	1.65942801914877	-3.98509705352239	3.00420207507103	-1.32650765625617	0.184671600816397
ENSG00000007312.11	165.093675152078	0.648412919896112	0.62556689967427	1.03652050681348	0.299959377498883	0.632261774682656
ENSG00000007314.10	21.5199071412755	-1.1874596616118	1.10212458974961	-1.0774277905201	0.281289194251045	0.613219941194489
ENSG00000007341.17	289.019579162961	-0.410004065783645	0.565741816108389	-0.724719393386848	0.468624195127861	0.763251297762486
ENSG00000007350.15	2.7405367106008	0.317061318392753	1.77579905708241	0.17854571840672	0.858294419862232
ENSG00000007372.19	60.8655135446404	0.381064705012934	0.619771891068062	0.614846704900153	0.538655961860013	0.804424542160988
ENSG00000007376.6	760.424102119304	-0.934233499551556	0.52242103836662	-1.78827694702436	0.0737313372399276	0.317287849895308
ENSG00000007384.14	340.88877910728	-1.29946325594931	0.479738879266808	-2.70868864732269	0.00675496977615478	0.0753423746672282
ENSG00000007392.15	591.643138005172	-0.542732146303543	0.397975925765137	-1.36373109820676	0.17265221272004	0.487967204372488
ENSG00000007402.10	32.4506729205484	0.572817552055288	0.770129177487826	0.743794117661959	0.457001039406483	0.755608485822516
ENSG00000007516.12	685.311953216085	0.00251613658798223	0.746555622156678	0.00337032702360947	0.997310873194018	0.998807480137784
ENSG00000007520.3	3239.45175083802	-1.00126338680313	0.608349543690826	-1.64586855893492	0.0997908233656657	0.368583878743868
ENSG00000007541.13	2448.91513037685	-0.3591686332842	0.559377044177926	-0.642086830381184	0.520816806333941	0.793657976562548
ENSG00000007545.14	228.200730553106	-0.609529973074026	0.501916858567367	-1.21440426371376	0.224593388059984	0.553284676660545
ENSG00000007866.17	493.054636081426	-0.482582239146861	0.409758349194174	-1.17772399292388	0.238906658529833	0.569511651578586
ENSG00000007908.14	142.513634334978	3.40869975848337	0.562901717784916	6.05558599447342	1.39907408051073e-09	3.4890012931909e-07
ENSG00000007923.14	495.325041478859	1.125919526459	0.588248329955301	1.91402077851126	0.0556175008428928	0.271285363823607
ENSG00000007933.11	17328.7032432255	1.92562141569178	0.890672597976223	2.16198569493118	0.0306192788419688	0.194585786102916
ENSG00000007944.13	148.566443689884	0.433367590428148	0.540667762003701	0.801541391745086	0.422818291577615	0.730796307545809
ENSG00000007952.16	34.398209024892	-0.506466236434165	0.658126383713647	-0.769557715611247	0.441562295815919	0.743914860228466
ENSG00000007968.6	27.1813292750839	-1.08119157460601	0.700782505606799	-1.54283471113455	0.122870885141831	0.409997958172435
ENSG00000008018.8	8071.52215885116	-0.00306891685337312	0.534158941842771	-0.00574532524492767	0.995415918909436	0.998193614104961
ENSG00000008056.11	86.6588279340506	0.391542492123736	0.999674711256836	0.391669897932569	0.695302134516675	0.882954352383598
ENSG00000008083.12	296.424214540022	-0.383281892195494	0.521825807840184	-0.734501602712758	0.462643083723678	0.7590369286501
ENSG00000008086.9	152.074246364409	0.337876383819073	0.647947059306091	0.521456774849657	0.602048609675551	0.838433321811116
ENSG00000008118.8	8.78918446689144	1.42454230207745	1.38130263918678	1.03130354034227	0.302398498640378	0.633416227888443
ENSG00000008128.21	140.958748794139	0.187919520032936	0.500688143341408	0.375322488722883	0.707420643011692	0.888353855652099
ENSG00000008130.14	3208.29683690016	0.716346510122897	0.56426688409841	1.26951719179388	0.20425666287	0.528320524276052
ENSG00000008196.11	0.518175457971108	2.66290702498796	4.00862997855202	0.664293546482393	0.506502450678016
ENSG00000008197.4	0.160797295611202	-0.552743515465692	4.0804728567969	-0.135460652444968	0.892247672257474
ENSG00000008226.18	34.1498335863875	1.126501039152	0.687624570731699	1.63825012528755	0.101369527115324	0.370504255440377
ENSG00000008256.14	263.899370157455	-0.268357612961716	0.566543792345162	-0.473674968444843	0.635731706066789	0.855272119442079
ENSG00000008277.13	17.8716679334878	0.373962724586118	0.918786276634928	0.407018187032314	0.683994630544311	0.877744975312518
ENSG00000008282.6	2325.24355801608	0.0327141757734262	0.383479251629184	0.0853088547410124	0.932015852132177	0.976892522002167
ENSG00000008283.14	1425.92300848259	-1.49152846450444	0.482702914943183	-3.08995122741282	0.00200189365724367	0.0333669039237955
ENSG00000008294.19	1654.72212869216	1.03029304236301	0.459642185565354	2.24151105951201	0.0249929899567237	0.172361064876376
ENSG00000008300.13	74.6047997386218	-2.40959680300092	0.572699430758637	-4.20743704914985	2.58283320026858e-05	0.00123840486500678
ENSG00000008311.13	814.155580925723	4.20681581186593	0.848723921595367	4.95663631579781	7.1724051332777e-07	7.00957215187356e-05
ENSG00000008323.14	266.980383844008	0.267320061072151	0.52580070223853	0.508405675256937	0.611168873565739	0.842894886079723
ENSG00000008324.9	831.030096108366	-0.365248465212748	0.44069748247668	-0.828796350639637	0.407219653604552	0.71945002089331
ENSG00000008382.14	2140.2834800852	0.250706626917136	0.523693282416514	0.478727979401002	0.632132158371367	0.854287984802864
ENSG00000008394.11	50333.2656184311	0.290513493053464	0.398917923369264	0.728253798675639	0.4664582386295	0.761889471977836
ENSG00000008405.10	288.363922101135	-0.255095482479667	0.707382733753896	-0.360618757438342	0.718384465189066	0.892826336526435
ENSG00000008438.4	2.72040491891761	2.92583358162304	2.178472351325	1.3430666585433	0.179250390486691
ENSG00000008441.15	1889.43299752526	0.159311459803811	0.748230390729264	0.212917654478773	0.83139119182136	0.939080763106842
ENSG00000008513.13	7970.00005181028	1.15723641786183	0.585387970054525	1.97687085669704	0.0480562298003458	0.250846486410456
ENSG00000008516.15	62.3986728716488	-0.521164152258057	0.809114039771083	-0.644117054754737	0.519499531861768	0.793066552439693
ENSG00000008517.15	23750.4064305767	-1.71763413766496	0.830715499174216	-2.06765630275635	0.0386723536670307	0.223182081669047
ENSG00000008710.16	1313.15391551596	0.0110666375232683	0.481952877945499	0.0229620737414079	0.981680525736515	0.993772895034501
ENSG00000008735.13	338.986335043988	-4.07809272109112	1.0205581376124	-3.99594356342287	6.44370846664933e-05	0.00250992278083346
ENSG00000008838.16	2347.13471927006	-0.938994178471708	0.433972034283273	-2.1637204803358	0.0304858082234202	0.193964837306546
ENSG00000008853.15	315.033164167614	-0.273350004248525	0.454728971461714	-0.601127311879533	0.547755193578641	0.810260904062331
ENSG00000008869.10	435.216124520929	1.0088339315289	0.60245063670458	1.6745503615819	0.0940224854349735	0.356565608109978
ENSG00000008952.15	7069.05850096089	1.12245078398642	0.413839827464781	2.71228313345928	0.00668214898518525	0.0746966201597715
ENSG00000008988.8	37266.1221009968	-0.441831933374552	0.530811530749205	-0.832370639633497	0.405199769199405	0.71770872663485
ENSG00000009307.14	11988.1555853439	0.189435578787572	0.482209243639851	0.392849331044878	0.69443076687048	0.88270953384139
ENSG00000009335.16	1579.62239606375	0.333438470274295	0.485317605868899	0.687052079384833	0.492049910480952	0.775205312031429
ENSG00000009413.14	284.58578945421	0.909874272756698	0.767774181322926	1.18508058084074	0.235985588245256	0.566556686855533
ENSG00000009694.12	198.662494895124	6.44085176048801	0.999291968316499	6.44541531874701	1.15284281357007e-10	3.90813713800255e-08
ENSG00000009709.10	0.797735529889837	0.833160557051855	3.88776937943441	0.214302978324569	0.830310795623871
ENSG00000009724.15	11282.1479024129	1.14744827935302	0.482927444598118	2.37602623787078	0.0175002183617841	0.139650316159846
ENSG00000009765.13	1324.47186378013	2.86241658244356	0.665759708438153	4.29947403870186	1.71203928577323e-05	0.00089075310177784
ENSG00000009780.14	190.1510246535	0.571872538186902	0.479952458156279	1.19151913584052	0.233449848978616	0.563333102373491
ENSG00000009790.13	89.4835945424952	0.902179209577024	0.550310666535219	1.63939982348004	0.101130018392427	0.370419815922643
ENSG00000009830.10	287.07395347554	0.21628572505963	0.472824663887166	0.457433255028431	0.647359666243359	0.861272246822169
ENSG00000009844.14	985.480848039111	0.797000778567193	0.479804598611707	1.66109449737097	0.0966944694461571	0.362393677061499
ENSG00000009950.14	11315.0124477287	0.140315551531871	0.583362390670342	0.240528964115487	0.809920212092006	0.932941483387504
ENSG00000009954.9	1770.39816386992	0.0822183309378356	0.510601408832899	0.16102253052095	0.872075655402635	0.955877480082491
ENSG00000010017.12	1117.27902531277	0.448444783466654	0.451864978443629	0.992430935920826	0.320987354248383	0.650372180474012
ENSG00000010030.12	76.8392810898623	-1.13559994078323	0.928711054880477	-1.22276991838907	0.221416610277129	0.549514387619835
ENSG00000010072.14	203.55691699278	-0.560494908544673	0.461944271918648	-1.21333879997408	0.225000314341087	0.553792119523525
ENSG00000010165.18	1298.90733488457	-0.464905262332672	0.429964310408687	-1.08126477262909	0.27957935271151	0.611837163246814
ENSG00000010219.12	410.837782709759	-0.410654846070548	0.596997841832303	-0.687866550421972	0.49153682249333	0.774900243085911
ENSG00000010244.15	1893.70018586167	-0.252649149601003	0.429334407101387	-0.588467044387943	0.556218847918851	0.815662326762244
ENSG00000010256.9	19099.2241426707	-0.204395010841085	0.476758826688561	-0.428717832579542	0.668128581549186	0.869643756170551
ENSG00000010270.12	380.360618945756	0.114691646151603	0.446147546519552	0.257071112564274	0.797123877151482	0.927512583861341
ENSG00000010278.10	2234.2123418616	-0.48878922180712	0.578083214022333	-0.845534362442561	0.397812555452696	0.712173592730915
ENSG00000010282.13	6.65140388187512	-1.2141157698833	1.60925634765876	-0.754457654710925	0.450574463094793	0.750646053236936
ENSG00000010292.11	430.276890830975	0.0887196141639838	0.535331767787945	0.165728281978452	0.868370788025068	0.954890894012656
ENSG00000010295.18	485.688502648421	0.13629182311543	0.494594218575961	0.275562911972248	0.782883799013022	0.922547413739983
ENSG00000010310.7	10.0990764441858	0.577502348076265	0.994170635455351	0.580888559247937	0.561315563540231	0.81856541881127
ENSG00000010318.18	165.380103531993	0.527001110049798	0.576643527656857	0.913911428419606	0.360763388027928	0.682816231933519
ENSG00000010319.5	202.529876191379	-1.32332914250589	1.00986681939804	-1.31039966566552	0.190060666676285	0.510593886108059
ENSG00000010322.14	1943.73775701537	-0.588105210558563	0.427952971331156	-1.37422859509364	0.169370726001407	0.483636124154584
ENSG00000010327.9	3308.23167079559	0.659715496042441	0.637802771437268	1.03435658417695	0.300969493099955	0.632655828578079
ENSG00000010361.12	477.563943270129	0.162653986663166	0.995807118134318	0.163338847153357	0.870251648990023	0.955418468600726
ENSG00000010379.14	725.449728257801	0.844441683707795	0.682564538120452	1.2371602047084	0.216027612300495	0.542483297078649
ENSG00000010404.16	1408.45630518435	0.693486911078249	0.50857021668223	1.36360110822526	0.172693143134215	0.487967204372488
ENSG00000010438.15	595.089486088215	-1.14860913657888	1.04369406565725	-1.1005228202151	0.271104392349189	0.603455514148765
ENSG00000010539.10	214.393796937958	-0.818603822075442	0.585932646140701	-1.39709542976868	0.162384875971305	0.474855713247042
ENSG00000010610.8	5873.45064374999	3.28487074450112	0.623131082162144	5.27155656094582	1.35271586734847e-07	1.78954411329222e-05
ENSG00000010626.13	146.550924308177	-0.135803868909708	0.622513108934521	-0.218154231550476	0.827308944132768	0.93769980531829
ENSG00000010671.14	112.203687834173	0.661952769687134	0.461712885733969	1.43368918247722	0.151660980556758	0.458676197839838
ENSG00000010704.17	719.417500198898	0.592925372759596	0.55378404911701	1.07067975992627	0.284313446532268	0.616287054033528
ENSG00000010803.15	397.177711267584	-0.163339378152012	0.556852130631223	-0.293326305435624	0.769272748660785	0.915883309825187
ENSG00000010810.16	990.012069310932	1.16979000478942	0.584374332672183	2.0017819732778	0.0453081855607374	0.242837547906561
ENSG00000010818.7	332.994986829755	0.258054118708966	0.750373125038892	0.343901067479717	0.730920689047328	0.898831739430701
ENSG00000010932.14	10.6269176024225	0.395736762332181	1.25613936948552	0.315042082069495	0.75272970261629	0.908956725415483
ENSG00000011007.11	1629.91937973607	0.954885320807919	0.500818361850313	1.90664998240084	0.0565659280219339	0.273617791040899
ENSG00000011009.9	3148.11456345966	0.18271216798195	0.498434982826352	0.366571718032088	0.713938507529981	0.890676467026871
ENSG00000011021.20	368.291691978569	1.10949601331752	0.547925642734117	2.02490251739488	0.0428773750712662	0.235689771863742
ENSG00000011028.12	434.177685592128	0.966879111460456	0.639141432020493	1.51277802223508	0.130336053223529	0.423331905208462
ENSG00000011052.20	29.6785885845637	-0.361310136633098	0.644085204962468	-0.560966365706463	0.574820466213867	0.826516325467298
ENSG00000011083.7	7.63947171902421	-2.93756634975436	1.70207033226522	-1.72587835770857	0.0843692990281254	0.338535737471998
ENSG00000011105.10	3887.20506876459	1.38446601018945	0.532680250459654	2.59905639263852	0.00934804149381227	0.0934631835252309
ENSG00000011114.13	339.741632039808	0.527192046977814	0.569712362538929	0.925365292458068	0.354775926179981	0.679095470301273
ENSG00000011132.10	626.584003989975	-0.737422973005995	0.467067122829562	-1.5788372526385	0.114373391471255	0.39469462404332
ENSG00000011143.15	307.919004628709	-0.0459610635632334	0.452508924653162	-0.101569407937007	0.919098462766042	0.973641603933799
ENSG00000011198.6	351.741770118239	-0.215064880238468	0.453086189668773	-0.474666597972652	0.635024629309617	0.855145502982913
ENSG00000011201.9	23.5837821993122	-0.205788209547035	0.735490435817721	-0.279797261154373	0.779633053095984	0.92151929517336
ENSG00000011243.16	1273.30173787493	-0.888543788892177	0.425494898916877	-2.08825955646946	0.0367744275705156	0.216809233850518
ENSG00000011258.14	448.52582937611	1.25474709303533	0.520783719574904	2.40934392891455	0.0159812297433312	0.132187861422537
ENSG00000011260.12	799.434255506398	-0.34162471748263	0.407356671385828	-0.838637836273608	0.401672571738419	0.715280270133043
ENSG00000011275.17	1120.44762006839	-0.271705593898501	0.428869127696865	-0.63353964263557	0.526381301638333	0.79723341852323
ENSG00000011295.14	1182.24294089936	0.951656645440645	0.842229586243404	1.12992545142628	0.258507638417913	0.589508274449762
ENSG00000011304.15	5229.64657681177	-0.416484764576287	0.400568338205583	-1.03973460918555	0.298463216660304	0.631138861065713
ENSG00000011332.18	2.472257122713	-1.0170409444268	1.74291303694879	-0.583529368858969	0.55953699231887
ENSG00000011347.8	2531.43526797953	0.617212363998364	0.981709080424045	0.628712086203544	0.529537564091759	0.798863872882117
ENSG00000011376.8	733.108741943412	0.579263317995742	0.52872862868681	1.0955777436044	0.273263605997427	0.605095651737108
ENSG00000011405.12	747.138125396462	0.519786506844373	0.488215982316572	1.06466507789852	0.287027518683873	0.618713268292629
ENSG00000011422.10	242.120682186563	0.586832134280347	0.82961556254363	0.707354298515206	0.479346330082059	0.768701043164313
ENSG00000011426.9	69.3100479848246	-1.47034883202657	0.771080389490834	-1.9068684044701	0.056537630545458	0.273617791040899
ENSG00000011451.16	1801.78705722313	-1.23315775836962	0.679206108312928	-1.815586967309	0.0694337542898111	0.307246433619163
ENSG00000011454.15	557.313240960243	0.701429161424673	0.430130708712492	1.63073490735934	0.102946267565523	0.373895325617621
ENSG00000011465.15	6998.40252900422	2.30228378842441	1.1790956440149	1.95258442358839	0.0508688583473469	0.258121781752344
ENSG00000011478.10	605.451615454761	-0.258213308130232	0.550685430513012	-0.468894388380103	0.639145127612757	0.857357035284183
ENSG00000011485.13	1525.24235088697	0.352117847918904	0.542598945465315	0.64894679737525	0.51637276507701	0.790964664721181
ENSG00000011523.12	482.413428071343	-0.906044481118813	0.503264047723341	-1.80033619571588	0.0718075688760134	0.312273747065828
ENSG00000011566.13	543.476759537075	0.139119680498551	0.519526682695775	0.267781588765897	0.78886744336975	0.924360123623137
ENSG00000011590.12	6.76957157215065	-0.731695079776444	1.2881148397576	-0.568035595268924	0.570010798250042	0.823639978610251
ENSG00000011600.10	2109.02008930822	0.274860245550748	0.613972632838613	0.447675076786357	0.654387711313848	0.864389393282511
ENSG00000011638.9	109.847589160053	-0.327589997607461	0.649132929505893	-0.504657802303785	0.613799203997147	0.843762444168605
ENSG00000011677.11	0.482391886833607	-2.18607804992141	3.98608958055019	-0.548426723922163	0.583398930861818
ENSG00000012048.18	132.207939368113	-1.0672602902359	0.553637014390474	-1.92772568035556	0.0538892561189604	0.26638899538778
ENSG00000012061.14	1694.1523545778	-0.306376792187336	0.543236808211879	-0.563983860364336	0.572765116182081	0.824978592187495
ENSG00000012124.13	108.109040768539	-0.696498714607766	1.13049812724893	-0.61609895480561	0.537829211868693	0.80385385648272
ENSG00000012171.16	320.095871216953	-1.20348741975294	0.620517776354181	-1.93948902934573	0.0524418191032136	0.26210037025186
ENSG00000012174.10	937.62542382245	0.687403009069057	0.523786696805464	1.3123720271276	0.189394640375441	0.509900335244359
ENSG00000012211.11	109.962219159162	-0.126740713660045	0.545906964115115	-0.232165409110479	0.816409543300402	0.934466971851518
ENSG00000012223.11	43.1124950313526	-0.0403079216290711	0.697805336587983	-0.0577638483336375	0.953936734924368	0.983913068738726
ENSG00000012232.7	1173.38379744161	-0.335984616461664	0.542495700522128	-0.619331390347047	0.535698069303281	0.802548357381852
ENSG00000012504.12	4075.91317461711	0.103028646898579	0.43170679205749	0.238654218080635	0.811373719657795	0.933331436387017
ENSG00000012660.12	3091.32696837751	-0.735325414424484	0.643287150650155	-1.14307492957276	0.253007482282803	0.584273585482459
ENSG00000012779.9	195.772217333169	-0.292065831642237	0.579912499462477	-0.503637758994596	0.614515953555096	0.843762444168605
ENSG00000012817.14	288.159098636016	1.76085832782152	2.14746167165297	0.819971946910761	0.412232099656367	0.723114509475925
ENSG00000012822.14	1522.74781214534	0.938471412791169	0.523144923101307	1.79390331693888	0.0728286019484129	0.315037895887509
ENSG00000012963.12	662.879156316387	0.332303993124104	0.481487430056455	0.690161305114737	0.490092754124921	0.774665043967237
ENSG00000012983.10	351.148999388921	0.926255865491164	0.495108323279764	1.87081457115351	0.0613707872347789	0.286958225026338
ENSG00000013016.13	526.181345747973	2.93493028639425	0.791013297332425	3.71034253948937	0.000206979001986204	0.00608707358878516
ENSG00000013275.6	3635.33808400472	-0.867259131001675	0.497453869770416	-1.74339608897189	0.0812644510039437	0.333005547371633
ENSG00000013288.7	2591.33532284953	1.13301503351816	0.567095633587744	1.99792586366803	0.0457246981715334	0.243745221506042
ENSG00000013293.5	57.3157580183715	-4.14691636575053	1.48949681645472	-2.78410555829247	0.00536755624740923	0.0643039758938656
ENSG00000013297.9	114.474703823247	0.0345469844372855	0.973962812938651	0.0354705374561991	0.971704539289585	0.990342945914449
ENSG00000013306.14	9744.8649509494	-1.37368142129275	0.632476869610812	-2.17190776026012	0.0298626210268254	0.191852819485334
ENSG00000013364.17	8880.55190848198	-1.2268543715638	0.707981619279788	-1.73289014595018	0.0831151960639074	0.336242269961316
ENSG00000013374.14	2443.61190988136	-0.57014141453907	0.440095334352783	-1.2954952484955	0.195149439419987	0.516778010210672
ENSG00000013375.14	1065.5363485085	0.527444363291689	0.484724631855373	1.08813195911418	0.276536856782573	0.608673088688806
ENSG00000013392.7	210.888240445471	-0.154726946869362	0.509419830498463	-0.30373169163431	0.761332311495111	0.913064016586195
ENSG00000013441.14	1098.82952142038	0.693993405081147	0.519706005337794	1.33535767905947	0.181759309056906	0.500247363858764
ENSG00000013503.8	597.327221679021	0.539720231723067	0.537515602211867	1.00410151724365	0.315329684192255	0.645779953580817
ENSG00000013523.8	638.832655606141	1.10487943770901	0.613737319953665	1.80024808951235	0.071821473559068	0.312273747065828
ENSG00000013561.16	1679.60303225228	-0.137064042886614	0.425513035694817	-0.322114791766139	0.747365732803323	0.906465056960023
ENSG00000013563.12	330.485902855794	0.488695815533891	0.431083460809585	1.13364547694803	0.256943288781517	0.588104398502351
ENSG00000013573.15	114.831672921143	-1.03089968374451	0.506824520437639	-2.03403671719422	0.0419478935810344	0.232703016909773
ENSG00000013583.7	3228.03927981056	0.700322354121474	0.559592370185197	1.25148660245261	0.210756998629549	0.535996230484902
ENSG00000013588.5	31.3721212835158	1.8150740742267	0.799030666552283	2.27159500906082	0.023110982619789	0.164929229759981
ENSG00000013619.12	123.817080345302	1.54619655066331	0.562563409335211	2.74848403754248	0.00598715500850019	0.0689476194609448
ENSG00000013725.13	158.894217638035	0.673567014112289	0.572629405185917	1.17627039060909	0.239486843865124	0.570197083112772
ENSG00000013810.17	561.122214118431	-1.01699244644388	0.433711979392756	-2.34485671312972	0.0190343930325691	0.146356735502117
ENSG00000014123.9	978.687810820626	1.49332124326124	0.488753110920697	3.05536928542137	0.00224783562396812	0.0362169250919196
ENSG00000014138.7	384.387492069114	-1.29379387680195	0.576218980474542	-2.24531631314271	0.02474783352054	0.171396437266602
ENSG00000014164.6	1021.95457502772	-1.48873407806038	0.55452651980955	-2.68469410366825	0.0072596215575262	0.0787523746560442
ENSG00000014216.14	4429.69000252164	-0.227177023364908	0.441999706303364	-0.513975507506303	0.607269114712077	0.840691086829582
ENSG00000014257.14	4.36946488948816	1.84131523268277	1.46120996113226	1.26013049572696	0.207622290780558	0.531836065147193
ENSG00000014641.16	7937.81861292673	-0.227940624115361	0.401673303980097	-0.567477653746825	0.570389704572416	0.823693758679655
ENSG00000014824.12	1125.92720099784	0.692617878427578	0.520012326764243	1.33192588479078	0.182884544237233	0.502005261276739
ENSG00000014914.18	512.93313803171	-2.91905627133219	0.559095496743972	-5.22103341617313	1.77927428453037e-07	2.15659971380843e-05
ENSG00000014919.11	1516.56703160555	0.0891752311630027	0.437429128521867	0.203862123824122	0.838461244275412	0.942766136019671
ENSG00000015133.17	244.91627116957	0.955680112277873	0.841464232649639	1.13573468151889	0.256067621155923	0.587091103096154
ENSG00000015153.13	449.510645634652	0.0472286432548027	0.492154193409054	0.0959631023920763	0.923549877299686	0.974247004322166
ENSG00000015171.17	1374.11417238204	0.422496663007387	0.474757946292997	0.889920150481574	0.373508763180319	0.694481768922443
ENSG00000015285.9	297.575358770761	0.347144011957718	0.494699797343392	0.701726610404797	0.482849674558787	0.770504793489664
ENSG00000015413.8	84.7162247870794	-0.843933618109804	1.45344611697607	-0.580643209440489	0.561480944079523	0.81856541881127
ENSG00000015475.17	2564.69828033178	-0.944297068355952	0.440156448042372	-2.14536688615101	0.0319235245156525	0.199370405265284
ENSG00000015479.16	23.153357232746	1.92260001229126	0.964608477387772	1.9931402816382	0.0462460881619671	0.244972533180258
ENSG00000015520.13	3124.50221464791	-0.0634502337655681	1.20373997494497	-0.0527109135579456	0.957962243354045	0.985488327729225
ENSG00000015532.8	964.281585477409	-0.130011064273341	0.45968418669728	-0.282826923430712	0.77730951468276	0.920422037255681
ENSG00000015568.11	0.67897275358231	1.70116591288557	4.00862723379887	0.424376180090316	0.67129148956966
ENSG00000015592.15	1.03775868599058	0.329178832419014	2.62179982764115	0.125554525158078	0.900084561664988
ENSG00000015676.16	2266.71096718936	-0.0112487696966395	0.425087463255365	-0.0264622475819334	0.978888645111951	0.992613948604827
ENSG00000016082.13	0.33492066179829	2.15064699510965	4.04535443548944	0.531633761492507	0.594979676822404
ENSG00000016391.9	3748.73341585881	-0.0576075719841758	0.386520130233462	-0.149041582774435	0.88152082107124	0.959488071738405
ENSG00000016402.11	20.2472606563564	5.5155213506912	1.1534803936323	4.78163424462108	1.73875827499853e-06	0.000139154821227827
ENSG00000016490.14	0
ENSG00000016602.9	0
ENSG00000016864.15	2747.40165957376	-0.0468177848995652	0.571566655577276	-0.0819113299257806	0.93471722473964	0.977755407547911
ENSG00000017260.18	1530.79850974724	-0.234005943185011	0.461171886979016	-0.507415889372413	0.611863039185448	0.84296294755953
ENSG00000017427.14	399.411248796653	1.82823379930391	0.736330182446492	2.48289944224412	0.0130317869541646	0.116209473800886
ENSG00000017483.13	39.4017649419825	0.0409025472276767	0.732835010170299	0.0558141282280873	0.955489879790881	0.984430442191153
ENSG00000017797.10	1470.33859026066	-0.380220786001859	0.554278859819396	-0.685973818531973	0.492729618490297	0.775625935461407
ENSG00000018189.11	523.900775139618	0.714251412302122	0.528490479940618	1.35149343159857	0.176537422577538	0.492660928325721
ENSG00000018236.13	20.358583689714	5.55402464999305	1.1554709101631	4.80671958172368	1.53426953807853e-06	0.000126568486304759
ENSG00000018280.15	110.822043004739	-0.133164402440804	0.647238601075103	-0.205742367991665	0.836992161606824	0.942023236925956
ENSG00000018408.13	1067.33972490264	0.435087122709073	0.701209088627912	0.620481294046584	0.53494096566155	0.802134162070148
ENSG00000018510.11	1326.10438147969	0.0565721645693083	0.466770445099092	0.121199114389726	0.903533325561947	0.969968284581495
ENSG00000018607.6	0.130813829777563	-0.552743515465693	4.0804728567969	-0.135460652444968	0.892247672257474
ENSG00000018610.12	455.619545500151	-0.289637944589207	0.473717091437415	-0.6114154414618	0.540924582564129	0.805594435976891
ENSG00000018625.13	102.694690025516	-3.62208942221998	1.17669544504265	-3.07818768015092	0.00208263706642256	0.0341533588761178
ENSG00000018699.10	467.290853624913	-0.320382143036651	0.418376502067566	-0.765774706402874	0.443810366728992	0.745791163856573
ENSG00000018869.15	86.9190928289856	-0.600940215962757	0.815002787059671	-0.737347436725708	0.460911091676655	0.758066439492775
ENSG00000019102.10	386.360997906698	-1.1620997902963	2.05423253862683	-0.565709951743396
ENSG00000019144.15	200.194921298527	0.035469644543972	0.679078912761156	0.0522319923022663	0.958343841546146	0.985595657650139
ENSG00000019169.10	3198.94403595731	8.37962058264315	0.936290911350472	8.94980446895152	3.56112586699498e-19	5.15081245402154e-16
ENSG00000019186.8	0.475944494734887	2.61820691624362	4.01177770568533	0.652630107728351	0.513994770740145
ENSG00000019485.11	154.679332114867	-0.511895669774734	0.811069350456886	-0.631136744948353	0.527951117121881	0.797984529413387
ENSG00000019505.6	145.507046223008	-2.44879046434866	0.966088429682418	-2.53474774059105	0.0112528326840015	0.105734715423169
ENSG00000019549.7	392.163734990758	-1.12436788678496	0.861941884091431	-1.30445904478833	0.192077114748769	0.513214911525774
ENSG00000019582.13	70657.5557299967	-1.14486036430752	0.558085535811428	-2.05140662289868	0.0402273646308427	0.228175922360984
ENSG00000019991.14	465.889966416815	2.43585105496723	0.613206341040142	3.97231876440718	7.11763854510864e-05	0.00272737626333001
ENSG00000019995.6	464.433606762708	2.16364257008144	0.736873954706203	2.93624514241937	0.00332211675635619	0.0467726444814431
ENSG00000020129.14	525.268423675544	-1.15883058995648	0.546883730891512	-2.1189706778576	0.0340929450752943	0.207166578079871
ENSG00000020181.16	264.12235340727	0.592787249919235	0.843231647380305	0.702994546944327	0.482059147798658	0.769988608601906
ENSG00000020219.9	0.259087728985554	1.3708098361768	4.0804728567969	0.335943868341979	0.736913195371712
ENSG00000020256.18	393.629026267406	-0.636347761443337	0.463123066202088	-1.37403599147373	0.169430509110426	0.483743166950888
ENSG00000020426.9	355.281845231071	-0.0651716606558594	0.490656377663222	-0.132825463242204	0.894331416029725	0.965488102810415
ENSG00000020577.12	972.931271693909	1.13460917406851	0.59167031637605	1.9176374792941	0.0551569943383735	0.270328170125612
ENSG00000020633.17	226.661655673843	0.814343565205778	0.621487258625862	1.31031417604012	0.190089573741776	0.510608318918109
ENSG00000020922.11	308.196801788861	0.194231971221451	0.517573522254055	0.375274164674349	0.707456578076926	0.888353855652099
ENSG00000021300.12	65.2514240664196	1.93991285239155	0.881263247445558	2.20128645783721	0.0277157509553228	0.183329886817307
ENSG00000021355.11	2776.11795163454	-0.745602163839196	0.561426007352752	-1.32805063191653	0.184161380901859	0.503365902491652
ENSG00000021461.15	183.350490460263	3.94189577856221	0.911896562964484	4.3227444193314	1.54100213376545e-05	0.000821463938431825
ENSG00000021488.11	830.166041404614	0.0408932168127432	0.71220221344657	0.057417986129035	0.954212235778436	0.984056881236284
ENSG00000021574.10	502.706554882722	0.107631660561888	0.441140398358866	0.243985046398607	0.807242401251905	0.932187094824427
ENSG00000021645.16	10.2355607028287	-0.0931982131607135	1.26836306705467	-0.0734791287932516	0.941424851982129	0.980093742255483
ENSG00000021762.18	186.316367605529	-0.628454671658441	0.447417132640708	-1.40462808822101	0.160131899729168	0.470570458692135
ENSG00000021776.9	647.500129507273	0.160192594996659	0.467809983312955	0.342430902953803	0.732026635446355	0.899401782803231
ENSG00000021826.13	95951.4456765612	2.18033770795929	0.93171787157377	2.34012652808352	0.0192772078141416	0.147335036504287
ENSG00000021852.11	23844.1443610908	1.10598031647363	0.532287329659962	2.07778816974689	0.0377288739236193	0.219958821858648
ENSG00000022267.15	863.135652649525	0.539641008184355	0.55296411727722	0.97590601509829	0.329111041045063	0.656694349245575
ENSG00000022277.11	2780.75598752026	-0.390422199445402	0.384245638093491	-1.0160745126023	0.309593905062472	0.640011600907094
ENSG00000022355.13	0.422424955166329	-2.0101915602777	3.99625291694655	-0.503019103659146	0.614950840973586
ENSG00000022556.14	14.3580059978643	1.05645266217201	0.890270703689533	1.18666452551316	0.235359973051033	0.566084203098773
ENSG00000022567.8	285.797412395583	-2.48684874954119	0.993876084904808	-2.50217183742717
ENSG00000022840.14	5036.22729581083	-0.505776769753719	0.471412290695864	-1.07289686700177	0.28331739191838	0.615300714220337
ENSG00000022976.14	158.922898745975	0.190907616003309	0.598148642084891	0.319164171865185	0.749602023976635	0.907062383030128
ENSG00000023041.10	982.906394623738	0.112171060329892	0.416982828118496	0.269006426082408	0.787924737590371	0.924052851002825
ENSG00000023171.13	172.765916283022	-0.940057214127676	0.767804585834309	-1.2243443598428	0.22082234933574	0.548737683132035
ENSG00000023191.15	6601.23391540796	-0.477319412799649	0.49354402268095	-0.967126316730232	0.333480891070044	0.660193595284901
ENSG00000023228.12	4897.22879404887	0.61206435804962	0.45403424624655	1.34805769192409	0.17763982768595	0.494399460071193
ENSG00000023287.11	1380.49663546675	0.140120063600728	0.451172053873302	0.310569022167486	0.756128280092771	0.910173056196891
ENSG00000023318.7	3392.20615390319	0.550798626397016	0.523676134752121	1.0517924912842	0.292894764786941	0.624999615075268
ENSG00000023330.13	18172.8767421053	0.997080701889765	0.58728971360179	1.69776633030871	0.0895518730278796	0.347584487235207
ENSG00000023445.12	1570.01130842011	-1.64660666402286	0.756355427708637	-2.17702762973648	0.0294785059964639	0.190280202874144
ENSG00000023516.8	670.929463568821	1.14927474957192	0.612702682466436	1.87574623461009	0.06069013392851	0.285254147684782
ENSG00000023572.7	412.495585034859	-0.512849572424157	0.53564598115069	-0.95744127739452	0.338344572579639	0.663858488612679
ENSG00000023608.4	159.199516967633	1.02509028395897	0.480010273465987	2.13555905076187	0.0327153721698506	0.202162550440637
ENSG00000023697.11	1929.38327687555	1.09556607773613	0.451957209990002	2.42404823624866	0.0153485666629776	0.128775967684511
ENSG00000023734.9	2558.8279226661	-0.0799658939509971	0.45147597467464	-0.177121039516278	0.859413316056386	0.950880224554954
ENSG00000023839.9	6367.13944035569	0.0756002909806639	0.565705584044159	0.13363893359547	0.893688095755762	0.965324802046923
ENSG00000023892.10	213.62381249458	-0.213187078364978	0.46171772174719	-0.461726003408001	0.644277821070688	0.859935503288197
ENSG00000023902.12	1066.66907421495	-0.361235376200893	0.598183420419102	-0.603887309260096	0.545918566745735	0.808791857330756
ENSG00000023909.8	4996.9447249336	-2.09663000676097	0.968786690513594	-2.16418126641424
ENSG00000024048.9	1464.25567462155	0.658354443647014	0.501792917818543	1.31200425567801	0.18951869865809	0.510085310269933
ENSG00000024422.10	1578.69494318982	-1.87499757190239	0.841766781336222	-2.22745493582679	0.0259168843881367	0.176377893251259
ENSG00000024526.15	49.5233151395503	-3.11257660700042	0.854438868595262	-3.64283124446064	0.000269655634442361	0.00750057518571981
ENSG00000024862.15	1325.38295269215	1.21901024810416	0.386754864627645	3.1518937693978	0.00162215277398228	0.0286131923449753
ENSG00000025039.13	933.213097066194	-0.748720331785226	0.548493276819428	-1.36504924203787	0.172237573713061	0.487586951889167
ENSG00000025156.11	162.097386566246	0.410449968058358	0.556052592238762	0.738149545182079	0.46042357911954	0.757839739683616
ENSG00000025293.14	671.153819700984	-0.0260968926897358	0.401069899912202	-0.0650681905958254	0.948119706969073	0.982173681753574
ENSG00000025423.10	33916.1205984373	0.715490381150956	0.576213938421375	1.24170960374744	0.214343725296578	0.540141023073814
ENSG00000025434.17	3786.47549257675	0.572245606857192	0.496223761640324	1.15320073542139	0.248828001745523	0.580055047369815
ENSG00000025708.11	5645.66534992432	-2.02378938037709	0.723068910081659	-2.79888867044296	0.00512788140905799	0.0622228831380997
ENSG00000025770.17	1538.6540524391	-0.90468875771526	0.471639299965437	-1.91817933276883	0.0550882758709119	0.270222752271152
ENSG00000025772.7	1041.62142542152	-0.92787131631774	0.545950737092493	-1.69955135743418	0.089215346542572	0.346817112496306
ENSG00000025796.12	3560.21113148769	0.611517028653006	0.58268963650754	1.04947297899144	0.293960485230736	0.626315102382995
ENSG00000025800.12	1321.31521293098	0.498818138901403	0.439992066245087	1.13369803041755	0.256921236105779	0.588104398502351
ENSG00000026025.12	7796.03161083147	-0.240594972451578	0.731632769114629	-0.328846632638843	0.7422716137338	0.904154594919175
ENSG00000026036.19	14.8588010681369	0.334090358648803	0.979561467224975	0.341061148102586	0.733057548828882	0.8998044652148
ENSG00000026103.18	793.090610664791	-0.326578091426656	0.821493988063503	-0.397541669411964	0.69096806498719	0.881389059306893
ENSG00000026297.14	1556.95671010369	0.038841843326109	0.582167251200971	0.0667193890518248	0.946805098472974	0.981855711634869
ENSG00000026508.15	1272.19999309705	-0.471978403891794	0.637828358139936	-0.739977139411298	0.459313865762176	0.757239637657763
ENSG00000026559.12	146.130186986664	-5.35630955937754	1.43205710603508	-3.74029047920268	0.000183807710157154	0.00554644239161281
ENSG00000026652.12	60.5774517080841	-0.556024573955185	0.715739195821117	-0.776853604220037	0.437245146756849	0.741130523752858
ENSG00000026751.15	208.931897952246	1.43645095097624	0.55675592152561	2.58003713196281	0.00987896921287665	0.0970078371616852
ENSG00000026950.15	704.880555532854	-0.0433739006492556	0.512803215876871	-0.0845819591343398	0.93259374218871	0.976892522002167
ENSG00000027001.8	480.95760401822	1.02434568823004	0.704778024177679	1.45343023347703	0.146104337240052	0.449118688121303
ENSG00000027075.12	269.278279606174	1.02851713990624	0.530956152591046	1.93710372294796	0.0527326656343951	0.263069191447192
ENSG00000027644.4	1.61848333328242	-1.19451740765217	2.67458139242065	-0.446618454400844	0.65515056874897
ENSG00000027697.11	2415.61352066139	-0.127489425800618	0.607807122608198	-0.209753096103153	0.83386038250966	0.94051201638776
ENSG00000027847.12	1336.50471936517	-1.03386900109771	0.526069952477762	-1.96526906018532	0.0493831045905471	0.254434997444562
ENSG00000027869.10	87.5242506273561	0.165515396597406	0.690595398010976	0.239670575671539	0.810585647381764	0.933078955165555
ENSG00000028116.15	170.515582864616	0.51120202095316	0.587051431742625	0.870795970015248	0.383865566084455	0.701370784591726
ENSG00000028137.15	2026.54940010971	0.903514637516476	0.599551194900996	1.50698496675613	0.131814510616391	0.425828598110556
ENSG00000028203.16	934.323509264148	0.581061855467754	0.478282120672555	1.21489353323656	0.224406700542838	0.553124944563223
ENSG00000028277.19	134.47102389708	0.634794816855295	0.5220389455237	1.21599130160391	0.223988235575063	0.552682726016445
ENSG00000028310.16	735.58688087155	-0.640954405132911	0.46150112149957	-1.38884690691593	0.164879308129661	0.478110327343107
ENSG00000028528.13	3220.22534556854	-0.096706504655245	0.402876850965366	-0.240039864349413	0.810299352583886	0.93302473500424
ENSG00000028839.8	478.535396280731	-0.228615169286409	0.769257446762926	-0.297189413308163	0.766321903909193	0.914294019293044
ENSG00000029153.13	136.470336788407	-0.0662549119932781	0.702232860498028	-0.0943489200238931	0.924831990637269	0.974764694492286
ENSG00000029363.14	1451.55692817579	0.843419555900808	0.491796312231706	1.71497738987404	0.0863493723874093	0.341724307634324
ENSG00000029364.10	3035.82807774942	0.327050939528081	0.451562601582453	0.724264893465415	0.468903125433789	0.763533639253339
ENSG00000029534.18	8.11590869353574	-0.102928287794096	0.937647427389384	-0.109772911211063	0.912589474907836	0.972568093506258
ENSG00000029559.6	0.583222250777531	-2.47160752488549	3.97196945601111	-0.622262470106612	0.533769294688175
ENSG00000029639.9	344.779909656571	0.233967560733577	0.450119060108257	0.519790387630565	0.603209679737966	0.839104266732307
ENSG00000029725.15	1416.57132561063	0.526437372596846	0.417393012214033	1.26125104443985	0.207218413191024	0.531231323714104
ENSG00000029993.13	2436.61940133963	-0.992360475369151	0.669139721322679	-1.4830392573431	0.138063980903217	0.437226117307866
ENSG00000030066.12	846.53324275971	-0.115745729102376	0.672521309608535	-0.172107154745401	0.863353288023623	0.952369266793157
ENSG00000030110.11	550.838370926681	-1.61815619917484	0.600821286375855	-2.69324046246021	0.00707612137115538	0.0778122297357258
ENSG00000030304.11	3.13333795044015	2.74801520207424	1.85764404539804	1.47930127350389	0.139059812665003	0.438651017095073
ENSG00000030419.15	65.9941575673152	1.72716862941851	0.679931597174592	2.54020939252661	0.0110786119215709	0.104550484667422
ENSG00000030582.15	13212.2663452932	-0.613032271776714	0.585317510440552	-1.04734996107549	0.294938201252303	0.627266983280035
ENSG00000031003.9	306.363492601857	0.228092316183464	0.644749530621253	0.353768875122226	0.723512101026525	0.89492808453687
ENSG00000031081.9	182.707666483574	0.507787786239193	0.487894569596752	1.04077359717056	0.297980636627318	0.630668997392087
ENSG00000031691.6	99.9917958253312	0.0115223209337998	0.489507614773572	0.0235385938564604	0.981220653559285	0.993571660450321
ENSG00000031698.11	8112.48700207251	-0.872617213616425	0.54701989370462	-1.59522025370364	0.110662991142924	0.387937349464678
ENSG00000031823.13	1432.22247385002	-0.0547489371334643	0.479486523480557	-0.114182431522884	0.909093178431563	0.971535783805659
ENSG00000032219.17	641.396455217299	1.56017119881778	0.637946610524354	2.4456140577899	0.0144605701684084	0.124208515717003
ENSG00000032389.11	900.963286979077	-0.640290122831126	0.513269169383871	-1.24747434879	0.212223620029898	0.538001127904113
ENSG00000032444.14	1973.85504089481	0.0619503512909524	0.44820914670996	0.138217507932834	0.890068518571681	0.963453389327817
ENSG00000032742.16	516.522755738236	0.783339733363628	0.653687439676832	1.19833988817483	0.230784723911238	0.559875676616422
ENSG00000033011.10	1048.068213057	-0.79050969094074	0.424438925254921	-1.86248160548883	0.0625352358780785	0.289721220929061
ENSG00000033030.12	524.314841543427	0.441394396396118	0.550558507231036	0.801721144254141	0.422714281971949	0.730796307545809
ENSG00000033050.6	1024.15683555491	-0.93365099399722	0.402358494697184	-2.32044558845436	0.0203167851514731	0.152840835869057
ENSG00000033100.13	1577.13417259996	-0.409097906208089	0.534132210418709	-0.765911319759943	0.443729070013865	0.745791163856573
ENSG00000033122.17	16.3710578589257	1.20801748986334	0.884354714210729	1.36598750529811	0.171942885163177	0.48744382899878
ENSG00000033170.15	97.6019538206441	0.738283877270765	0.68630154180141	1.07574270536084	0.282042342547506	0.613945085172138
ENSG00000033178.11	705.718286706562	0.0711556812328061	0.506894621166686	0.140375688084896	0.888363165737284	0.963221366611121
ENSG00000033327.11	348.647879960175	-0.315713108027151	0.506656119165393	-0.623130948358466	0.533198473744573	0.801016070236965
ENSG00000033627.13	4483.82871294154	-1.21332666677979	0.555566555608078	-2.18394475789095	0.0289663075874588	0.188318561330174
ENSG00000033800.12	624.081950488414	-0.136201055957253	0.638028506075433	-0.213471740933704	0.830959028586224	0.938925407465695
ENSG00000033867.15	151.508927617553	0.320552563028826	0.489818238684497	0.65443165997602	0.512833742629452	0.789090887693624
ENSG00000034053.13	217.820959106941	-2.76146524941188	1.04414221096962	-2.64472139944185	0.00817582014594967	0.0858164460021887
ENSG00000034152.17	2986.52517019503	0.180952669135795	0.465522592634543	0.388708672787986	0.69749166598888	0.883924017832637
ENSG00000034239.9	19.2370262051824	2.10309367264374	1.10726922689815	1.89935168570994	0.0575182513885503	0.276393351522921
ENSG00000034510.5	25505.8738050377	-1.44074040902145	0.754247669695413	-1.91016885687332	0.056111475603004	0.272591709512489
ENSG00000034533.10	202.451764130179	0.364602280335621	0.52990563208294	0.688051340202692	0.491420451448344	0.774900243085911
ENSG00000034677.10	1491.58084469051	-0.3542903188362	0.528518065539261	-0.670346657828447	0.502636830407643	0.782576869215947
ENSG00000034693.13	600.730107220412	1.33862821258672	0.468515238509814	2.85717112818878	0.00427435321547902	0.0549346044633139
ENSG00000034713.6	2280.13086653986	-0.0142315122855249	0.427251058299297	-0.0333094839885815	0.973427790828593	0.991246097334889
ENSG00000034971.13	0.587890195560186	0.313493296341367	3.59756576246149	0.0871403935440146	0.930559918079598
ENSG00000035115.20	287.960966657594	1.66735862664517	0.659247385842114	2.52918504108334	0.0114327734130975	0.106502984959452
ENSG00000035141.6	1468.71867485835	0.00728796289368602	0.397585332137044	0.0183305627863905	0.985375145981557	0.994695360478687
ENSG00000035403.15	825.188806059274	-0.284660073414567	0.412537775052461	-0.690021837099324	0.490180454901428	0.774683650568552
ENSG00000035499.11	43.1801715695735	-2.1397733717957	0.784091177751166	-2.7289853941894	0.00635295176618971	0.0720133968230157
ENSG00000035664.10	426.220629649857	-2.03001233247964	0.491883783575162	-4.12701617793717	3.67500549275504e-05	0.00162720243205742
ENSG00000035681.6	255.921509609692	0.0833472026119109	0.605949437351327	0.137548114536142	0.890597564219249	0.963487951347579
ENSG00000035687.9	762.445136201551	0.0606845430567737	0.53536977548426	0.113350707932443	0.909752517133073	0.971644708659996
ENSG00000035720.6	6.04216679590646	2.3188144732632	1.20205894769087	1.92903557493382	0.0537264459592787	0.265887082922562
ENSG00000035862.11	4173.72825825017	-0.58382342759483	0.77937900550206	-0.749087957814238	0.45380419267338	0.75296235578477
ENSG00000035928.13	1609.28501058097	-0.0972583561938733	0.455584468068518	-0.213480403768387	0.830952272359007	0.938925407465695
ENSG00000036054.11	878.452785730566	0.397624553826258	0.528329288348086	0.752607441221933	0.451685844740518	0.751763576342433
ENSG00000036257.11	1236.29419164631	0.385499482140865	0.43726634285186	0.881612519332334	0.377986382645488	0.696976184115924
ENSG00000036448.8	348.997186195161	2.15888400934406	0.748814751808835	2.88306821430677	0.0039382214801351	0.051973025080907
ENSG00000036473.6	7690.07546935696	1.38010649728037	0.492803445160758	2.80052120339817	0.00510201555849193	0.0619783480162603
ENSG00000036530.7	33.2625154818034	0.78091375365864	0.7092198569047	1.10108839460141	0.270858187481408	0.603216920098196
ENSG00000036549.11	807.152239384803	0.202245201000735	0.558138617174476	0.362356580923539	0.717085581324283	0.891980558100209
ENSG00000036565.13	1.01658738614446	0.420279519418715	2.14406981929531	0.196019511881776	0.844594893977645
ENSG00000036672.14	318.950459878234	1.4267298359509	0.467341435100499	3.05286398507355	0.00226668652136508	0.0364039190913996
ENSG00000036828.12	18.2568439382796	0.920711067854726	1.45887371830181	0.631110874302728	0.527968031414273	0.797984529413387
ENSG00000037042.8	306.908719108102	-0.605587949997495	0.458408902978949	-1.32106498382145	0.186479697366408	0.50631786359367
ENSG00000037241.6	1057.28861981587	-1.14382165099756	0.442344507544622	-2.58581632978041	0.00971486831696927	0.0960245025079568
ENSG00000037280.14	383.641871923823	0.0124726245411882	0.704497833291122	0.0177042766518121	0.985874768908587	0.994798714458707
ENSG00000037474.13	2206.88881999455	-0.507537724905829	0.459194065828346	-1.10527936372669	0.269038556955826	0.601077183782679
ENSG00000037637.9	505.812701614021	0.404470628216105	0.398087039834714	1.01603565990001	0.309612405646665	0.640011600907094
ENSG00000037749.10	135.553157672674	0.723826026752606	0.675628132217449	1.07133790355498	0.284017522764629	0.615977703760283
ENSG00000037757.12	487.616374304529	1.02489398315065	0.574572126395831	1.78375165808963	0.0744640279620266	0.319145464413073
ENSG00000037897.15	490.60777539442	-1.23765674525463	0.527932431524676	-2.344346873482	0.0190604354375827	0.146487852374706
ENSG00000037965.5	37.9995739339947	-4.7149136959311	1.70288006795585	-2.7687878815746
ENSG00000038002.7	759.986802577938	-0.063013229852696	0.703282099696575	-0.089598796670472	0.928606040679898	0.975927943927124
ENSG00000038210.12	1464.07280631766	0.565877030043461	0.462020711884645	1.22478714803753	0.22065542851903	0.548683955087362
ENSG00000038219.11	502.011674888618	0.787227100843151	0.598979392647579	1.31428077577676	0.188751734205702	0.50896813638167
ENSG00000038274.15	2385.79122656407	-0.00961629650643545	0.479308047292958	-0.0200628730536583	0.983993217191043	0.994365975921158
ENSG00000038295.6	8.39329800508014	2.75551032000844	1.30010808274143	2.11944711104181	0.034052698979411	0.207166578079871
ENSG00000038358.13	403.107988478143	0.445468694647339	0.627237070419135	0.710207855459924	0.477575250245243	0.768377718192656
ENSG00000038382.16	705.262324249537	0.114131902158133	0.542539235437516	0.210366172072503	0.833381892675171	0.940301404589535
ENSG00000038427.14	288.489574789826	-1.28883670599146	1.04537577341575	-1.23289322248229	0.217615604408395	0.544566107640663
ENSG00000038532.13	661.521734941092	-0.252389538957499	0.439863736168545	-0.573790285955262	0.566109723008249	0.820845856471761
ENSG00000038945.13	482.846688029494	0.656820990952973	0.536294284976025	1.22473986643795	0.220673248262522	0.548683955087362
ENSG00000039068.17	6190.21345981563	0.24821415077781	0.894574916241328	0.27746603025794	0.781422286122663	0.922010097385746
ENSG00000039123.14	1141.7466778706	0.204512186511173	0.513037701199508	0.398629937006604	0.690165899603567	0.880917717249028
ENSG00000039139.9	120.351956217066	0.502203317705393	0.965752558758687	0.520012412238277	0.60305492397764	0.839086746015447
ENSG00000039319.15	616.058438505972	0.321792742069801	0.543609980551758	0.59195517665659	0.553880604046102	0.813718417211824
ENSG00000039523.16	1118.90829080315	-0.120517273406269	0.479007369950898	-0.251597952279154	0.801351841564563	0.929600334337371
ENSG00000039537.12	19889.6062921023	2.38383581466031	0.591892656945075	4.02747996057926	5.63778708700001e-05	0.00227355815315153
ENSG00000039560.12	1259.45964359584	0.439506318967567	0.444158598659129	0.989525634073939	0.322406034375266	0.651079541120678
ENSG00000039600.9	2.17173021052773	1.6001392188053	2.02817196451854	0.788956383777426	0.430137499293244
ENSG00000039650.8	1238.48573195501	-0.548174737048188	0.559880925478999	-0.979091646280331	0.327534698861755	0.655613324707504
ENSG00000039987.5	0.298274160676709	0.409037163963165	4.0804728567969	0.100242589111168	0.920151735052521
ENSG00000040199.17	201.73969833511	-0.0100225849708104	0.511862157210171	-0.0195806328513071	0.984377913617971	0.994365975921158
ENSG00000040275.15	110.348486746614	-1.27203990860373	0.511958088108277	-2.48465633838116	0.0129676553696573	0.115755020699394
ENSG00000040341.16	904.33286242981	-0.321261728480662	0.572073838333988	-0.561573886014873	0.574406376701515	0.826193553641549
ENSG00000040487.11	638.908879759014	-0.257057374507153	0.485574053189787	-0.529388612959271	0.596535895753932	0.836395640975017
ENSG00000040531.13	682.367861219795	-0.58983916407489	0.552125017261598	-1.06830725946878	0.285381934934828	0.617377106753386
ENSG00000040608.12	329.795984716416	-0.665199671783626	0.710000654204656	-0.936900082900322	0.348809956563105	0.6742498946537
ENSG00000040633.11	1286.46587358198	-0.855240404851952	0.404350491220055	-2.11509673766296	0.0344217032242554	0.208219199284684
ENSG00000040731.9	0.130813829777563	-0.552743515465693	4.0804728567969	-0.135460652444968	0.892247672257474
ENSG00000040933.14	307.624540300555	-0.0407337441992882	0.471480829775491	-0.0863953349252498	0.931152155256588	0.976764809165227
ENSG00000041353.8	49.4803645903191	3.28487931895523	0.807732836710681	4.06678937596767	4.76652870461132e-05	0.00200028252950188
ENSG00000041357.14	4855.4219811089	-0.515125960458426	0.472056830556935	-1.09123717127592	0.275168535648267	0.607018904732207
ENSG00000041515.14	158.742709613868	1.74275474850096	0.725464295179981	2.40226122785078	0.0162940679833682	0.133856909870184
ENSG00000041802.9	805.291669583007	-0.300448591972842	0.438924590958014	-0.684510729547122	0.493652716426894	0.776276678669124
ENSG00000041880.13	777.53529560656	-0.238945155187264	0.434648672266408	-0.54974320740777	0.582495516896386	0.830070458757569
ENSG00000041982.13	248.846746357469	0.64613571886301	0.96189251728433	0.671733803156321	0.501753177540572	0.781536375283756
ENSG00000041988.14	376.510593180008	0.101709063181075	0.423074876872147	0.24040440295823	0.81001676521479	0.932941483387504
ENSG00000042062.10	198.159146448159	4.02204322098824	0.835279524972154	4.81520628812531	1.47047902582779e-06	0.00012317958665776
ENSG00000042088.12	261.89924598166	0.0274151951526419	0.599740318098215	0.0457117761226656	0.963539977633558	0.987580988929387
ENSG00000042286.13	2259.3751451783	-1.04682602860857	0.511080936201868	-2.04825880688903	0.0405346469867039	0.229140099276584
ENSG00000042304.9	0
ENSG00000042317.15	215.804896236431	0.277751679325942	0.500460030301241	0.554992731704777	0.578899631936477	0.828622047208681
ENSG00000042429.9	384.196694182577	-0.096437753026425	0.439347274201594	-0.219502336054496	0.826258760327923	0.937431891652702
ENSG00000042445.12	6488.31533448	0.968369573364755	0.63818180972541	1.5173882404787	0.129168691174383	0.421103519717418
ENSG00000042493.14	1367.81719134643	-2.91268001002406	0.667327570723614	-4.36469305001996	1.27301384035147e-05	0.000715526121250401
ENSG00000042753.10	4006.42127717545	0.179137038325092	0.608608384452443	0.294338761839865	0.768499056112735	0.915514799111679
ENSG00000042781.11	438.375507059184	2.08078736584169	0.841644329432008	2.4722882256522	0.0134251228884317	0.118403035035534
ENSG00000042813.6	1.31232161625159	1.7531180650581	2.19636993010176	0.79818888477356	0.424760886706842
ENSG00000042832.10	297.414996297802	-1.35281920149608	1.30801844481746	-1.03425086003652	0.301018902950383	0.632655828578079
ENSG00000042980.11	51.3872063464193	-0.420354946876868	0.785234832346261	-0.535323866900885	0.592425925353203	0.834435194990488
ENSG00000043039.6	4.56884150723427	5.85355382973126	2.31135640966882	2.53251891627132	0.011324625926941	0.106135540050655
ENSG00000043093.12	969.026157517809	0.520649719306454	0.459438857570095	1.13322961418652	0.257117840943616	0.588255686714403
ENSG00000043143.19	667.513105224037	-0.534540528962344	0.625754226343541	-0.854233989094754	0.392975354070225	0.709388688868152
ENSG00000043355.9	103.792608598701	-6.81091543766296	1.16085376001983	-5.8671605952731	4.43321244631776e-09	9.07386577691605e-07
ENSG00000043462.10	423.887953579421	1.16139516610941	0.432486500177726	2.68539056278553	0.00724450951867066	0.0787420976500545
ENSG00000043514.14	364.640618353182	0.0981758507398764	0.519508700571121	0.188978260868292	0.850109855096673	0.947232223345038
ENSG00000043591.5	38.7612469273922	0.526122445888101	0.910170424200328	0.578048277442491	0.563231525594479	0.819469563979062
ENSG00000044012.3	497.704352706902	-3.2482339219294	2.1011936022207	-1.54589939665551	0.12212886630408	0.40886998735492
ENSG00000044090.7	926.437808536145	-0.530660273347388	0.511713929430209	-1.0370252651482	0.299724082648724	0.632261774682656
ENSG00000044115.19	7540.46289679198	-0.803788589492971	0.377134981284931	-2.13130213154557	0.0330642595838947	0.203439366273152
ENSG00000044446.10	2495.202010842	0.334752063220356	0.470440036880942	0.711572223826424	0.476729712212294	0.767992960556002
ENSG00000044459.13	413.331188009556	1.77881796228919	0.609693976704467	2.91755869379603	0.00352783246950331	0.0485351003540544
ENSG00000044524.9	146.400387488301	1.16219050789449	1.0826942031224	1.07342452240238	0.283080686802159	0.615105334996283
ENSG00000044574.7	22197.894616697	-0.783173434954209	0.598134639187599	-1.30935977227123	0.190412511318884	0.510950415591195
ENSG00000046604.11	851.6164922224	0.510546055192418	0.90352081490018	0.565062859397238	0.572031009492763	0.824636862588372
ENSG00000046647.12	457.686297157969	-0.291125504188609	0.422763428398552	-0.688625090612512	0.491059227411542	0.774894337356216
ENSG00000046651.13	407.944502179038	-0.00984971675392423	0.445476078762798	-0.0221105402141445	0.982359778657274	0.994043083706367
ENSG00000046653.13	16.463051772433	1.9345866417226	0.798347080438709	2.42324007831219	0.0153827569221777	0.128940717493917
ENSG00000046774.9	5.28130696250498	-0.666944549076516	2.14353618737597	-0.311142192515519	0.755692526907288	0.909991031525231
ENSG00000046889.17	53.8905876259042	0.93092974749991	0.785819343753495	1.18466127730235	0.236151398515438	0.566691289929407
ENSG00000047056.13	423.696410344032	0.0476197599063241	0.477717139371141	0.0996819163093247	0.920596857720631	0.973842788086613
ENSG00000047188.14	646.634882811689	0.194043598977291	0.688154010370427	0.281976993598918	0.777961151241862	0.920796178761629
ENSG00000047230.13	553.139900391741	0.0567857831869848	0.545739627439467	0.104052885903514	0.917127379425427	0.973407237446372
ENSG00000047249.15	1304.07650078286	-0.865923857943822	0.517322848886495	-1.67385581326568	0.09415894009851	0.356833600764589
ENSG00000047315.13	1055.75889550319	0.542929572601221	0.524151797332311	1.03582507083727	0.300283759091407	0.632282388594935
ENSG00000047346.11	890.07071089992	1.57213479466191	0.62364002067295	2.52090106880163	0.0117054757012287	0.108017950432719
ENSG00000047365.10	263.033471926166	1.11971351490958	0.778247560794449	1.43876263970111	0.150217784934848	0.456076834865164
ENSG00000047410.12	1652.89286454184	-0.030953284585862	0.567718562715902	-0.0545222344638247	0.956519094393954	0.984937744279603
ENSG00000047457.12	42263.7479962022	1.69107765276521	0.710029832793676	2.3816994366441	0.0172329564578514	0.13852768555374
ENSG00000047578.11	311.495705156852	-0.752288647107863	0.511084588493836	-1.47194547447587	0.141035602266218	0.440759790441346
ENSG00000047579.18	520.955136973288	-1.00931271857403	0.567381331711156	-1.77889659416544	0.0752567166011204	0.320590952950698
ENSG00000047597.5	103.19040414021	-2.24749372755804	0.989323497210068	-2.27174805197295	0.0231017320862137	0.164929229759981
ENSG00000047617.13	15.1787461770168	-2.4385327748127	1.22976425335847	-1.98292702699164	0.0473755812361626	0.248756198088041
ENSG00000047621.10	206.743280267944	-0.0522979301333256	0.443978386898698	-0.117793864919056	0.906230990789771	0.970942596354315
ENSG00000047634.13	792.951700813947	-0.0250751078806476	0.759214198940954	-0.0330277119627445	0.973652488741563	0.991335322902856
ENSG00000047644.16	570.052864785324	-0.677525075680434	0.491306005478971	-1.37902868706015	0.167885909232956	0.482144958958324
ENSG00000047648.20	40.5357336640566	-0.335914986239739	0.752686360945586	-0.446288126993208	0.655389131570978	0.864449060645872
ENSG00000047662.4	6.13001105628871	0.0310509365463341	1.18482948353095	0.0262070930694585	0.979092158375549	0.992681128469363
ENSG00000047849.20	5273.01987596475	-0.703136546724655	0.4170905934629	-1.68581252549202	0.0918319144776108	0.352011522350927
ENSG00000047932.12	638.961511651152	0.926382379790848	0.599478185126928	1.54531457987033	0.122270190540073	0.409062688996789
ENSG00000047936.9	1.99845984144787	1.78869786936984	1.98268688688499	0.902158520945317	0.36697266546475
ENSG00000048028.10	415.422712256761	0.690778188496005	0.494890852508415	1.39581927003643	0.162768925983753	0.475178460110374
ENSG00000048052.20	56.0563889873032	1.61804140992039	0.708929877549495	2.28237158731884	0.0224674113304583	0.162430175350091
ENSG00000048140.16	1632.59044953798	-0.868610028404128	0.483810512369281	-1.7953517052584	0.0725976818853868	0.314432478014498
ENSG00000048162.18	1086.76499378307	-1.42811640862348	0.513482532351852	-2.78123659257195	0.00541522559917012	0.0646608335715987
ENSG00000048342.14	143.647739016671	-0.00996588682848498	0.829144916800731	-0.0120194752769377	0.990410077153956	0.996518899686139
ENSG00000048392.10	1142.19248945113	-0.470576777653004	0.474791251075439	-0.991123523416052	0.321625267870272	0.650890323094938
ENSG00000048405.8	347.968071986513	0.432501485838452	0.442528974628833	0.97734049211401	0.328400612930594	0.656075478650292
ENSG00000048462.9	12.7635219885845	2.85389314633388	1.04573676557571	2.7290741229345	0.00635124262529115	0.0720133968230157
ENSG00000048471.12	315.496553639176	-0.264926706608919	0.481099161355474	-0.550669649605085	0.581860153749052	0.829819095230358
ENSG00000048540.13	18.2326137620203	-0.872218172111668	1.06709917389133	-0.817373111564691	0.41371523689536	0.724218636411306
ENSG00000048544.5	1554.4260726973	-0.450960313238546	0.469632975683648	-0.960239882180503	0.336934498848525	0.66311247453367
ENSG00000048545.12	0.518175457971108	2.66290702498796	4.00862997855202	0.664293546482393	0.506502450678016
ENSG00000048649.12	631.986678141395	0.91709189474828	0.456150836354152	2.01050139922632	0.0443781482733845	0.240166701157234
ENSG00000048707.12	1297.65253037219	0.937452681342661	0.415385401643006	2.2568262573376	0.0240189333472064	0.168754785589699
ENSG00000048740.16	175.197548966745	0.979148155652712	0.526076581810371	1.86122741347505	0.0627120686566685	0.29016870155152
ENSG00000048828.15	5438.26280578289	0.184399838144161	0.47021285310458	0.39216247902766	0.69493816555403	0.882796172574411
ENSG00000048991.15	476.035594029251	-0.535640388004574	0.442436464553731	-1.21066058274572	0.226025515167342	0.554859648910461
ENSG00000049089.12	64.0510761927677	-1.02661322074565	0.561428957570062	-1.82857190906034	0.0674637640949174	0.301917043276264
ENSG00000049130.12	118.950496101992	-1.21865491191901	0.692124064598002	-1.76074633761915	0.0782813460859283	0.327432443547388
ENSG00000049167.12	133.132568410341	0.11651792199631	0.50789873568087	0.229411718932733	0.818548928638453	0.935238167135704
ENSG00000049192.13	5.52529709513472	-0.384475240629798	1.43847751502453	-0.267279284253005	0.789254135522497	0.924360123623137
ENSG00000049239.11	7897.53939314394	1.28502296921719	0.564990078345529	2.27441687645233	0.0229409336994732	0.164499695912594
ENSG00000049245.11	1742.00254450582	0.438423917667711	0.499726712359057	0.877327360784949	0.380308855115934	0.698542238452023
ENSG00000049246.13	779.866967493702	2.80395282729407	0.647272621119088	4.33195030317556	1.47794306162104e-05	0.000791798285131375
ENSG00000049247.12	128.549824006975	-4.52483699877687	2.11726679659398	-2.13711234033232
ENSG00000049249.7	1561.55440491202	-7.73568704724979	2.30130979688	-3.3614279388796
ENSG00000049283.16	7.7529062286387	-0.174096705103305	1.49082657037018	-0.116778643849952	0.907035467681378	0.971399956735726
ENSG00000049323.14	647.509912194686	1.29306081775783	0.586454091621802	2.20487986396677	0.0274625258523992	0.182210079783992
ENSG00000049449.7	4844.33667683835	-0.493027074207211	0.47326575941392	-1.04175521765564	0.297525181303657	0.630319923207122
ENSG00000049540.15	1702.96393084995	-0.507573268136684	1.22571404437538	-0.414104146449055	0.678797836262316	0.875420427720811
ENSG00000049541.9	866.873229769957	-0.35230188252806	0.46177009485307	-0.762937848195126	0.445500462883628	0.747242214358191
ENSG00000049618.20	821.140564332592	0.866502355423083	0.523668513191353	1.65467721200655	0.0979899919374986	0.365353302126821
ENSG00000049656.12	5431.46515199452	-0.783090383703873	0.423451952789539	-1.8493016233487	0.0644142714864456	0.294365517975903
ENSG00000049759.15	1969.05690976137	-0.824637192546622	0.498671275010223	-1.65366892755096	0.0981947993436471	0.365628288993393
ENSG00000049768.13	96.6434663713853	1.27576395087866	1.02108177980954	1.24942387192201
ENSG00000049769.11	199.361723980168	-0.76298714423946	0.921184367086885	-0.828267577588512
ENSG00000049860.12	6608.21789868983	-1.04405373389973	0.712806945087248	-1.46470757769053	0.143000716625928	0.444242910169993
ENSG00000049883.13	283.280422829245	0.0717149290312828	0.550472772595191	0.1302787941594	0.896345856881095	0.966268494032209
ENSG00000050030.12	2.37025567174204	-0.938651829174137	1.72679883262813	-0.543579142768786	0.58673111573793
ENSG00000050130.16	854.554319920012	0.000814650002924122	0.449045393204208	0.00181418185166338	0.998552493104088	0.999243341653351
ENSG00000050165.16	3163.8532196862	-3.78794218599333	1.32386625824152	-2.86127255106933	0.00421944142167421	0.0543939400384098
ENSG00000050327.13	428.332757926239	-0.428716689981877	0.902211769766944	-0.475184102389421	0.634655757326541	0.855032962125335
ENSG00000050344.8	191.328708521549	-1.1306394817335	0.703917577303784	-1.60621004246575	0.10822776758182	0.383473398557706
ENSG00000050393.10	1799.03351345393	-1.0366362547661	0.591149105867414	-1.75359523422607	0.0794998882243328	0.330047756394015
ENSG00000050405.12	546.368552223009	0.536074812119039	0.465447638613015	1.15174031974141	0.249427798529542	0.580307279624961
ENSG00000050426.14	1848.30658024598	0.151446485590182	0.428082178279306	0.353779001496692	0.723504511463622	0.89492808453687
ENSG00000050438.15	10.8826252000153	0.474716324631241	0.851166751164918	0.557724234389487	0.577032706467425	0.827389493683565
ENSG00000050555.16	749.86477408053	0.372247297637859	1.19011882304154	0.312781623507577	0.754446577698887	0.909778553045808
ENSG00000050628.19	22.8367669208299	-1.70751294048398	0.942332661518873	-1.81200653464751	0.0699851868080467	0.307929144795656
ENSG00000050730.14	3.32771801637119	0.895961476645213	1.33260655530063	0.672337587625847	0.501368805881451	0.781331533716705
ENSG00000050748.16	1023.09145779517	-0.265018324337916	0.430214545530307	-0.616014328411976	0.537885063121326	0.803881954224721
ENSG00000050767.14	97.3388226169643	-1.82767527592024	0.941052234170989	-1.94216134828086	0.0521175706174092	0.261413236764836
ENSG00000050820.15	1953.58503598438	-0.853521413209711	0.552969681887821	-1.54352298356723	0.122703935380892	0.409579702466126
ENSG00000051009.9	1040.97823015756	0.628658628672669	0.419061280164653	1.5001591853718	0.133573172847218	0.429708594364264
ENSG00000051108.13	5384.34585173137	0.329899823203639	0.549252998657482	0.600633631514076	0.548084032570496	0.81032924461215
ENSG00000051128.17	620.422439077028	-1.89579448051138	0.763021744456666	-2.48458775163916	0.0129701537297302	0.115755020699394
ENSG00000051180.15	63.226710405454	-1.58786736295908	0.569164489596946	-2.78982155770738	0.00527370985148779	0.0634952324849496
ENSG00000051341.12	20.2870281490827	-1.17457706006052	0.887433826406293	-1.32356579736996	0.18564729059971	0.505381347057736
ENSG00000051382.7	742.881959418076	-0.166345175536101	0.484066973466163	-0.34364082793128	0.731116416268196	0.898831739430701
ENSG00000051523.9	1569.5323962982	1.02732088393638	0.631853119484523	1.62588559311773	0.103973995453299	0.375850046450649
ENSG00000051596.8	333.692877093595	-0.892622003356135	0.514916766963623	-1.73352677680274	0.0830020824355494	0.33603147522177
ENSG00000051620.9	2633.93197587684	1.11411897715758	0.626926480550713	1.77711264673155	0.0755497077987006	0.320979736289431
ENSG00000051825.13	298.610408674556	0.736501345988303	0.642477704678008	1.14634537607405	0.251652274701668	0.583067893200276
ENSG00000052126.13	590.769322000742	0.386580069106486	0.748377350186925	0.516557681776351	0.605464963216192	0.839927566365607
ENSG00000052344.14	1249.6254279739	-0.525212172230958	0.764308088366003	-0.687173379721517	0.491973477347426	0.775152982173548
ENSG00000052723.10	762.656505947637	0.437267186714211	0.477319244797194	0.916089580465166	0.359619912325991	0.681875250970489
ENSG00000052749.12	1156.90107261292	-2.10501685751186	0.535612068915086	-3.93011468501017	8.49053544517007e-05	0.00312221452573576
ENSG00000052795.11	2076.68238913758	3.49646720269761	0.721545985297856	4.84579953868672	1.26102794749725e-06	0.000109876555618074
ENSG00000052802.11	12053.2520546034	-0.0163712427017775	0.644155380214086	-0.0254150523377395	0.979723904956943	0.992774534173033
ENSG00000052841.13	2322.2168613358	0.121624487232867	0.57045805402111	0.213204961128247	0.831167098810202	0.938925407465695
ENSG00000052850.5	0.818207872823011	-1.45440754386485	3.84257189990906	-0.378498459299948	0.705060338093625
ENSG00000053108.15	76.3766410200668	-6.31298463269006	0.926188552114754	-6.8160901128347	9.35516281072839e-12	4.05939224683126e-09
ENSG00000053254.14	1999.77102283234	0.849302072111796	0.595700511701271	1.42571989687613	0.153949210864776	0.461986139328836
ENSG00000053328.8	7.3958198926695	2.99877624364824	1.66308742615322	1.80313806507726	0.0713665343595308	0.311417604477953
ENSG00000053371.11	2392.27395346925	0.613688873559793	0.488802434806129	1.25549471496229	0.209299225454726	0.533978832956931
ENSG00000053372.4	926.254061441699	0.081493949804615	0.426207239580454	0.191207333514173	0.848363158304142	0.946821527870401
ENSG00000053438.8	1.10929335740417	2.68122668686477	2.89615377537395	0.925788785686483	0.3545557562311
ENSG00000053501.11	2444.95202998031	-1.71287301618486	0.760019180472559	-2.25372340619068	0.0242135739306021	0.169463774193014
ENSG00000053524.10	11.6556969879101	-2.76851823001578	1.42049572078544	-1.94898033799425	0.0512977728417842	0.259412591511488
ENSG00000053702.13	82.9879704136374	-1.1544741179311	0.906930359309289	-1.27294682119842	0.203036913074425	0.526609547646472
ENSG00000053747.14	1336.86581503694	-3.52845150389124	1.21438642129053	-2.90554261973842	0.00366616916739981	0.0493738089732503
ENSG00000053770.10	701.380509897379	0.811867879961064	0.519566958880846	1.56258566116259	0.118150083089109	0.40196190395685
ENSG00000053900.9	422.561978266714	-0.137871827718575	0.407811589869799	-0.338077266912873	0.735304961344878	0.900798328277077
ENSG00000053918.14	234.443652476173	-0.856075566308845	0.636732689857155	-1.34448188375706	0.178792610803289	0.495754274126262
ENSG00000054116.10	2139.448973534	-0.72497707275139	0.503336187375376	-1.44034363301345	0.14977020249225	0.455311196241773
ENSG00000054118.12	3046.14257161393	0.575604153512632	0.477434112042193	1.20562008242462	0.2279640122041	0.55668586696227
ENSG00000054148.16	2951.59888506982	-0.906868261765607	0.688875141641558	-1.31644794092088	0.188023740574427	0.508141887830439
ENSG00000054179.10	82.4242049847217	-1.22794583502168	0.928438171398358	-1.32259300926008	0.18597076028848	0.505616743761762
ENSG00000054219.10	53.4667972264499	0.76620408092919	0.610327829134712	1.2553975820101	0.209334466688564	0.534005948180492
ENSG00000054267.19	758.85811300322	0.0916489512967378	0.591309163283807	0.154993287754531	0.876826608956042	0.956923043657459
ENSG00000054277.11	234.837457553477	0.328614989791209	0.934278331931895	0.351731361586542	0.725039738462233	0.896016300163853
ENSG00000054282.14	451.623272795778	0.186653589214652	0.619688044984754	0.301205728794146	0.763257621619561	0.913449826673783
ENSG00000054356.12	2.45356553967886	-4.55068550115957	2.32686191394269	-1.95571790224921	0.0504983946428446
ENSG00000054392.11	178.578560411739	-0.036312697052086	0.492124567133488	-0.0737876128875238	0.941179383638965	0.980093742255483
ENSG00000054523.15	1304.64011257679	0.702234177324425	0.514936439214129	1.36372981954072	0.172652615302894	0.487967204372488
ENSG00000054598.6	162.24617021606	-2.14473215822707	1.071085235385	-2.00239167469818	0.0452426231692467	0.242665995619277
ENSG00000054611.12	1595.91681636906	-0.607926351715449	0.498134000173698	-1.22040726291212	0.222310525451128	0.550507059914796
ENSG00000054654.14	1283.65513115631	1.02308096083018	0.626024569242171	1.63425049286589	0.102206264254227	0.372217143358112
ENSG00000054690.12	93.2522757252451	-0.778047772408787	0.716478564030582	-1.08593307806984	0.277508601107307	0.609518554311127
ENSG00000054793.12	1463.97668400839	-0.62674777805792	0.580613941357323	-1.0794569909788	0.280384056799808	0.61220727792921
ENSG00000054796.11	0
ENSG00000054803.3	276.150179566877	-3.6654260664177	2.02282756913142	-1.81203090285722
ENSG00000054938.14	378.382774878612	0.0244062699092619	0.61892861752004	0.0394330932815071	0.968545095796513	0.989424522013674
ENSG00000054965.9	1188.4193325532	0.458827254320355	0.49801872750918	0.921305222024803	0.35689109550627	0.680031690334599
ENSG00000054967.11	62.4983910066701	-0.127066782860669	0.628504012987115	-0.202173383518673	0.839781180339175	0.943400429174066
ENSG00000054983.15	382.116067518149	1.62444886606536	0.439697452575282	3.69446958710145	0.000220346263556422	0.00639977581542187
ENSG00000055044.9	1915.13284013963	-0.927798772199705	0.496850073654282	-1.86736164770157	0.0618511018003716	0.288089631743423
ENSG00000055070.15	2754.4401470494	0.372672543103091	0.440845297083133	0.845359008180174	0.397910424162276	0.712240290621627
ENSG00000055118.13	106.762501843749	-4.20857884494285	2.15268888821593	-1.95503347835402	0.0505791188998696	0.257174727830225
ENSG00000055130.14	2565.29907693371	-0.256320365114496	0.497670091132208	-0.515040726139204	0.606524561250953	0.84041109215102
ENSG00000055147.16	601.161535053811	-0.237398509528517	0.511809887941464	-0.463841194009265	0.642761527224337	0.859067805122384
ENSG00000055163.17	1960.16588956722	1.19399382500988	0.844521476497502	1.4138110850203	0.157417377971021	0.466681094273695
ENSG00000055208.16	2229.01987448867	0.645341511973987	0.791750725950754	0.81508168015766	0.415025557291245	0.725341911631292
ENSG00000055211.11	1412.59899768645	0.622048347226133	0.585724453002223	1.06201532826182	0.288228726604052	0.619816273933696
ENSG00000055332.15	940.580109469761	0.157569361519207	0.5177425498058	0.304339215655175	0.760869471426701	0.912790934590749
ENSG00000055483.18	1067.78811032619	-0.871358998371613	0.499365970787643	-1.74493067078085	0.0809969377572059	0.332613275801521
ENSG00000055609.16	988.156853258182	0.813323936259632	0.530215174043258	1.53395069789775	0.125041782217376	0.413768610455173
ENSG00000055732.11	27.032167968194	-1.87423311831491	1.14953419855115	-1.63042832538357	0.103011002152112	0.373900653443391
ENSG00000055813.5	1.71536390861332	0.660577313210414	2.29183258161701	0.288231050779609	0.773169881776341
ENSG00000055917.14	2901.14138908374	0.376680209077399	0.45698556196135	0.824271575366002	0.409785265725262	0.721238024269918
ENSG00000055950.15	2847.19964524972	-0.251704878325119	0.42652443313395	-0.590130034229647	0.555103474470935	0.81470633547309
ENSG00000055955.14	2569.29686768595	0.416682596996439	0.71433690908694	0.58331382810534	0.559682055338904	0.817315869464418
ENSG00000055957.9	110123.214853197	1.16502265622906	0.525708859200338	2.21609857973706	0.0266847515044926	0.1793532740525
ENSG00000056050.6	539.643056058649	0.105448922175655	0.520858184935496	0.202452270551752	0.839563168317902	0.943253197650314
ENSG00000056097.14	1427.4580443169	0.291852279038007	0.505280173478238	0.577604850451503	0.5635309314535	0.819469563979062
ENSG00000056277.14	53.5026768094301	-0.28741103551041	0.721923603516736	-0.398118352288709	0.690542946983844	0.881103314751971
ENSG00000056291.16	1.03039669378969	-2.08918549922657	2.58494534142028	-0.808212640224989	0.418968182384817
ENSG00000056487.14	16.1253670261869	-6.27884912122199	1.86117212780181	-3.37359937183125	0.000741922618533418	0.0158432609563987
ENSG00000056558.9	179.152881498038	0.105184079426405	0.544626950699246	0.193130507572862	0.846856760819504	0.946058610923225
ENSG00000056586.14	892.722300771997	0.426480602332398	0.390150547383414	1.09311804172168	0.274341975519705	0.606297589503796
ENSG00000056736.8	2135.15569677865	-1.16843669729734	0.438351837862132	-2.66552252408905	0.00768687821709358	0.0821954212903214
ENSG00000056972.17	466.791469482152	0.0821885925903201	0.707335940101861	0.116194566019768	0.907498343271242	0.971399956735726
ENSG00000056998.17	1380.12576710921	1.26853427574722	0.564718487000742	2.24631264063001	0.0246839894643226	0.171396437266602
ENSG00000057019.14	784.260340979961	0.907594932730245	0.52555814737815	1.72691630271162	0.0841826961067455	0.338234179319813
ENSG00000057149.13	4.22529185177628	5.74853066120912	2.50726527347276	2.29274928426179	0.0218624433536202	0.160191682202008
ENSG00000057252.11	847.204371030629	0.396096421077215	0.550086663727183	0.720061850606253	0.471486914832255	0.765156713606149
ENSG00000057294.12	973.471740364763	0.440524711933065	0.697473583146196	0.63160056893614	0.527647914714067	0.797984529413387
ENSG00000057468.6	1.4571815133501	-0.905020490003131	2.05059441782286	-0.441345437272769	0.658962936457326
ENSG00000057593.12	9146.47849699777	0.727432825446219	0.647133066101648	1.1240853907038	0.260976802379283	0.592426853184208
ENSG00000057608.15	9028.17998438512	0.160932039649622	0.386577584446789	0.416299459990479	0.677190887676638	0.874775707886559
ENSG00000057657.13	118.810901467492	0.68708155576656	0.533572637801633	1.2877001313212	0.197850367851068	0.519932362027226
ENSG00000057663.11	870.737110595249	0.677562384329972	0.474337835503042	1.42843841164685	0.153165709753411	0.46072194588932
ENSG00000057704.9	203.579449476503	-0.771189834105405	0.633948374825759	-1.21648680670152	0.223799533853547	0.552458150698208
ENSG00000057757.8	1209.87450465517	0.476787091304816	0.401295197064297	1.18812060247116	0.234785898529596	0.565174176689018
ENSG00000057935.12	670.428272706496	-0.652922616623213	0.457853425156619	-1.42605161553584	0.153853443615939	0.461815759918569
ENSG00000058056.7	537.974999609266	0.0879003860949191	0.501874780045995	0.175144059015803	0.860966439196904	0.951415905490977
ENSG00000058063.14	629.742315091798	1.33286766053734	0.591239859108059	2.25436029050561	0.0241735112829937	0.169456704619008
ENSG00000058085.13	66.3889136304832	1.53531249685155	0.907662718162701	1.69150111173382	0.0907411356389571	0.350056841895948
ENSG00000058091.15	1025.901399732	-0.894796221829073	0.75809489400135	-1.18032218513726	0.237872097785015	0.56831578355391
ENSG00000058262.8	14677.4150635131	-1.00202600975934	0.508593467826303	-1.97019048247303	0.0488165439212068	0.252894875098974
ENSG00000058272.14	503.812983015027	0.367413993600134	0.42384766209677	0.866853887508878	0.386022071932223	0.702956610991689
ENSG00000058335.14	82.8739925326801	-5.02999443476381	1.38969205368551	-3.61950291175955
ENSG00000058404.18	632.325307418301	-1.62962105274614	1.02613735270145	-1.58811200903655	0.112261013231365	0.391200601199438
ENSG00000058453.15	278.11412206508	-0.176027309744263	0.594186991115333	-0.296249013149625	0.767039920699249	0.914781119145278
ENSG00000058600.14	958.889199551314	-0.401261150496944	0.439825384848199	-0.912319216489596	0.361600701327662	0.683462885399873
ENSG00000058668.13	1439.80513212626	-0.192899426162376	0.48575865138992	-0.397109604966222	0.691286637324168	0.881518448535627
ENSG00000058673.14	2043.7328004786	0.447207141174637	0.487177554277078	0.917955142326388	0.358642350859292	0.681059469955642
ENSG00000058729.9	567.194174259495	-0.355299982484401	0.496557002159565	-0.715527081360597	0.474283413009756	0.766598594104125
ENSG00000058799.12	2138.93104470311	-0.758170264674182	0.468651975291283	-1.61776820465326	0.105712560979833	0.378784429895698
ENSG00000058804.11	690.034286385826	-0.717372615856292	0.450187676556785	-1.59349678636929	0.111048788683539	0.388921238108212
ENSG00000058866.13	86.5070682383851	-1.17351079520747	0.686682949994946	-1.70895577823231	0.0874591411926896	0.343317084732512
ENSG00000059122.15	874.115155133341	-0.90525742992531	0.460451684276944	-1.96602045521205	0.0492962478090568	0.254347536852627
ENSG00000059145.17	335.543895437333	-1.51809257912189	0.797180466832839	-1.90432736661649	0.0568675622195835	0.274299384152086
ENSG00000059377.14	443.871853349852	0.563868126567757	0.593209682653221	0.950537631223029	0.341839142219079	0.666895245893817
ENSG00000059378.11	1360.32128886918	-0.707850848212153	0.518059764665349	-1.36634978527893	0.171829201738494	0.487321092930506
ENSG00000059573.7	1285.55820305976	-0.196696523607656	0.602428970377763	-0.3265057513491	0.744041738579094	0.904810804338996
ENSG00000059588.8	521.463094292297	-1.43902807133084	0.569034935661592	-2.5288923072144	0.0114423130388756	0.106523683386904
ENSG00000059691.10	1305.09061074566	0.225069956826661	0.576812611053553	0.39019597095072	0.696391640695003	0.883717203984254
ENSG00000059728.9	268.454222652208	0.148538632946045	0.624362358875283	0.23790452905204	0.811955142681235	0.933534749021197
ENSG00000059758.6	455.38539501234	0.231791416321193	0.527467328311424	0.439442224911304	0.660341136509158	0.866693006042925
ENSG00000059769.18	1289.97782659702	1.42046154325757	0.525740976398669	2.70182771939853	0.00689594837506455	0.0762339571073918
ENSG00000059804.14	372.906179717018	1.60742694330404	0.890349116305886	1.80538949706982	0.0710137535380586	0.310565288603451
ENSG00000059915.15	122.756577160149	-0.794363361118722	0.709529858377484	-1.11956297785019	0.262900039537105	0.594465831121759
ENSG00000060069.15	754.118786316378	-0.669571503999319	0.460742756092595	-1.45324369215857	0.146156104983733	0.449214173923654
ENSG00000060138.11	994.283206827706	0.0252843539933705	0.917982431331727	0.0275433963988725	0.978026327642706	0.992517567169403
ENSG00000060140.7	2.44317707337189	1.7386465745611	1.62527881206143	1.06975280896936	0.284730589021322
ENSG00000060237.15	2521.00608765139	0.387359511283986	0.527735499244169	0.73400313573517	0.462946826956424	0.759296168748456
ENSG00000060303.5	0.652216991621548	3.06318825239512	3.9842812500057	0.768818278677173	0.442001196233116
ENSG00000060339.12	1009.73767012019	-0.132432676576353	0.394266519876094	-0.335896328752368	0.736949045613819	0.901666425908463
ENSG00000060491.15	3304.51462419173	-0.243189411797028	0.516422662348622	-0.470911579850185	0.637703878336228	0.856641901082459
ENSG00000060558.3	112.801239428244	-0.0630300342748144	0.622576573677026	-0.10124061350807	0.919359457406956	0.973641603933799
ENSG00000060566.12	9753.94187565956	0.999410738567321	0.721541975268839	1.38510408655706	0.166020642531867	0.479262932397772
ENSG00000060642.9	1052.43892034907	1.47854974651891	0.470581513675195	3.14196308939462	0.00167819190390631	0.0293866437023014
ENSG00000060656.18	660.997999513948	-0.408192888013172	0.682252145195865	-0.59830209532868	0.549638378759495	0.811043371028454
ENSG00000060688.11	528.145386447234	0.26206814895064	0.439401727737931	0.596420388012092	0.550894423687096	0.811694765114787
ENSG00000060709.12	2.25613980038506	4.82088087203437	2.31797067469968	2.07978510024031	0.0375452483442602
ENSG00000060718.17	6.31001864271445	-2.28975779686426	1.6231220858067	-1.41071199565757	0.158329552471055	0.467634337766371
ENSG00000060749.13	390.592273168895	0.401398897621837	0.473511792050643	0.847706233214369	0.396601594124462	0.711030525714526
ENSG00000060762.17	5786.09410506412	2.49468479312987	0.551281567056333	4.52524615769521	6.03252492612754e-06	0.000380469944178091
ENSG00000060971.16	15126.1110213954	1.28642553218978	0.584582874586606	2.20058709913369	0.0277652677130162	0.183460996638729
ENSG00000060982.13	104.502708471253	-1.02981530054971	0.74664061861259	-1.37926503712498	0.167813052157807	0.482144958958324
ENSG00000061273.16	776.628601451129	-0.747491709635309	0.463656916409039	-1.61216555427348	0.106925918719167	0.380890065278735
ENSG00000061337.14	76.6507236442946	-1.05548501115527	0.708395913804275	-1.48996484958113	0.136233478516239	0.433708224488383
ENSG00000061455.10	94.183258368284	-3.38615869932635	1.14726349061045	-2.95150915813123
ENSG00000061492.10	0.160797295611202	-0.552743515465692	4.0804728567969	-0.135460652444968	0.892247672257474
ENSG00000061656.8	365.861719938405	-2.20527301197001	0.73348872532101	-3.00655338772232	0.0026422765096602	0.0400606786538
ENSG00000061676.13	2178.36074542621	-0.0533778032065141	0.524529744889983	-0.101763157812356	0.918944669595061	0.973641603933799
ENSG00000061794.11	2831.4603703356	0.113296670396414	0.451035635664908	0.251192281579689	0.801665451708269	0.929655975213138
ENSG00000061918.11	186.667092047308	0.844053267921641	0.820946310633436	1.0281467338228	0.303880810097712	0.63449119968049
ENSG00000061936.8	797.010611834062	-0.70659856684538	0.403144887567022	-1.75271617881526	0.0796507372011241	0.330294800136771
ENSG00000061938.15	1105.14955524528	0.0865856275579953	0.584756318905797	0.148071298690736	0.882286500054017	0.959768724082469
ENSG00000061987.13	864.686812896982	1.06675166733164	0.546773831427759	1.95099254210118	0.0510579329620691	0.258820774192769
ENSG00000062038.12	10.9920843476572	2.6106580536119	1.14677833332831	2.27651497917209	0.0228152051054706	0.164071306906049
ENSG00000062096.13	70.4286546801101	3.35558846205468	0.942112869548402	3.56176905179437	0.000368364352775907	0.00946923340974653
ENSG00000062194.14	1987.36560717843	-0.429481092385501	0.446315420259912	-0.962281545493975	0.335908196510728	0.66241267328638
ENSG00000062282.13	9666.21326640121	0.909324005578454	0.554432085140697	1.6400998967217	0.100984397904376	0.370419815922643
ENSG00000062370.15	33.2927899601389	1.5868188823901	0.970482930982759	1.6350817018319	0.102031921485416	0.372035236452712
ENSG00000062485.17	2177.65763350875	-0.443900463127172	0.44190119520215	-1.00452424194985	0.315125992482973	0.645656572527042
ENSG00000062524.14	80.780063085312	3.53988105750238	0.753590251911148	4.69735515888779	2.6355195127519e-06	0.000193176457259004
ENSG00000062582.12	520.432104001507	-0.246022448060312	0.489901537329426	-0.502187540380952	0.615535606509253	0.844128931416523
ENSG00000062598.16	502.242585996407	-0.169914331608445	0.455202868181996	-0.373271662999521	0.708946264484348	0.88914377445242
ENSG00000062650.16	1205.40508711584	0.204340949994941	0.431155863828543	0.473937541241933	0.635544447414704	0.855272119442079
ENSG00000062716.9	4324.92414335058	-0.716193804190947	0.405336774140968	-1.76691050474949	0.0772432174840485	0.324918125666596
ENSG00000062725.8	656.087529881581	0.369480791410577	0.46658925681709	0.791875908011786	0.428433035889807	0.734810830402533
ENSG00000062822.11	536.72989762546	-0.793883226039903	0.573563146863902	-1.38412523604533	0.16632011088306	0.479723627455313
ENSG00000063015.18	14.3526437385814	-2.94447185569578	1.53758155905814	-1.91500206174393	0.0554922406769849	0.27113137213074
ENSG00000063046.16	8245.1880810759	0.307896907116055	0.436119799853682	0.705991581256696	0.480193372908814	0.768933162493884
ENSG00000063127.14	213.8533155161	2.04843775580521	0.534018775219612	3.83589089159421	0.000125109945167955	0.00416956278089699
ENSG00000063169.9	289.13791269474	-0.19417562837636	0.524817938639558	-0.369986645044385	0.71139244115603	0.890050770043321
ENSG00000063176.14	751.233967407808	0.817643929364789	0.477849790295307	1.71108985704376	0.0870645262911335	0.342666748054557
ENSG00000063177.11	25279.9764601454	-0.329072976991242	0.536884806160526	-0.612930321765989	0.539922413016277	0.804820108059165
ENSG00000063180.7	224.137043298679	-1.40400617058369	0.934401706001929	-1.50257235358771	0.13294935704233	0.428407730638704
ENSG00000063241.6	9357.2988621361	0.0393701299288152	0.591385328517196	0.0665727200698899	0.946921863782898	0.981855711634869
ENSG00000063244.11	2857.58175166149	-0.326160335644847	0.428660285186422	-0.760883027694067	0.44672693679359	0.747868243299253
ENSG00000063245.13	10549.5872527887	-0.395928261711531	0.529189137407911	-0.748179117301761	0.454352125209672	0.753180295579848
ENSG00000063322.12	2385.07423366399	-0.177755105636216	0.435308253845921	-0.408343062796906	0.683021828306238	0.877496518199856
ENSG00000063438.15	12.2556094427736	0.609099347689031	0.860792901177154	0.707602661285977	0.479192039733277	0.768701043164313
ENSG00000063515.2	0
ENSG00000063587.13	842.905501631685	1.15978547832744	0.542338613838287	2.13848958701152	0.0324770283721323	0.201377995873616
ENSG00000063601.15	485.184379078602	0.296774477772515	0.456120555473723	0.650649207125268	0.515272958194443	0.790427346008718
ENSG00000063660.7	5230.2713342459	-1.88516161629782	0.719475368514012	-2.62018923620886	0.00878809859151346	0.0897254527254004
ENSG00000063761.14	331.00734752083	-1.04688934765206	0.566584423386484	-1.84771995918064	0.0646428650669599	0.294950914930129
ENSG00000063854.11	11004.2470554121	0.305787639923451	0.463834076399822	0.659260833738021	0.509728288419306	0.786859150673389
ENSG00000063978.14	1000.47638964312	-0.497463668847128	0.413148397405225	-1.20407987050523	0.228558709336655	0.557244689418935
ENSG00000064012.20	556.142671228882	-0.408273623089084	0.528495746062741	-0.772520169047142	0.439806405971498	0.742763553525532
ENSG00000064042.16	388.080166938038	0.614242311517695	0.665931969719586	0.922379971900648	0.356330412893271	0.67978639441031
ENSG00000064102.13	488.297955066826	-0.205320924284835	0.466015751356189	-0.440587949414402	0.659511328438014	0.86609059164612
ENSG00000064115.9	3153.54769359641	0.233224983019888	0.643122140974778	0.36264492879438	0.716870143385322	0.891964491358639
ENSG00000064195.7	3.01393811824395	-1.84140353558525	2.03299249104304	-0.905760126364514	0.365062830151436	0.686462399286319
ENSG00000064199.5	78.2991341457417	-1.0515151090668	0.625102800500282	-1.68214749354067	0.0925402427663204	0.353789093754729
ENSG00000064201.14	23.9171998187351	1.06552130979132	0.70179507696138	1.5182798294978	0.128943870316669	0.420757344278313
ENSG00000064205.9	151.572352243822	-0.851146952971923	1.3109006185357	-0.649284118824102	0.51615474884135	0.790882897365896
ENSG00000064218.4	1.09885777817907	1.25610655577801	3.53969872278619	0.354862561520291	0.722692557036957
ENSG00000064225.11	1931.78357745487	1.37516260106522	0.762787975478971	1.8028110631945	0.0714178921144852	0.311516402757513
ENSG00000064270.11	20.1137890938191	-1.19699936672852	1.47299184220633	-0.812631361851662	0.416429444941802	0.726391159145951
ENSG00000064300.7	909.166055894359	1.59663026254842	1.04527923751083	1.52746769021314	0.126644755541906	0.416519117601578
ENSG00000064309.13	163.082561073387	0.154693064131013	0.754237461824293	0.205098622066388	0.837495072982571	0.942249477958336
ENSG00000064313.10	422.117032654919	0.0359078875144715	0.653566994219447	0.0549414028432635	0.956185146974599	0.98482757886356
ENSG00000064393.14	1861.41903358519	0.93417208014122	0.515309909786482	1.81283546541593	0.0698572021482256	0.307690656783165
ENSG00000064419.12	1213.21886495684	0.204259106067485	0.480710618001848	0.424910743425059	0.67090174256615	0.871368162589204
ENSG00000064489.20	10.462861668097	-0.061562721830941	0.880755025804251	-0.0698976673732015	0.944275109756804	0.981323612885652
ENSG00000064490.12	1236.98512532014	-0.603422783786032	0.621279706937268	-0.971257836121406	0.331419899535711	0.658850443740381
ENSG00000064545.13	2051.38657110717	-0.356667644143431	0.432164584164514	-0.825305120346595	0.409198385575678	0.720848341462319
ENSG00000064547.12	81.7246156518514	0.253750669857421	0.808296836027038	0.313932528926703	0.753572283875488	0.909467890691583
ENSG00000064601.15	11251.1678413869	-1.28789465708277	0.502882031478346	-2.56102739104972	0.0104363127603739	0.100544512277563
ENSG00000064607.15	675.219329912287	-0.57733719632281	0.671133037667742	-0.860242550909307	0.389655353535818	0.706439588059924
ENSG00000064651.12	436.139767221955	0.478804687399195	0.573978211410188	0.834186172716967	0.40417608171526	0.71730865747136
ENSG00000064652.9	338.085825563205	-0.0265855636646084	0.490376309991106	-0.0542146166585629	0.956764175402004	0.985003110445188
ENSG00000064655.17	158.554449656726	0.682028776664828	1.08120192695152	0.630806105375548	0.528167310884147	0.797984529413387
ENSG00000064666.13	1560.40513376357	0.634025409395883	0.424092851771741	1.49501555319101	0.134910383086643	0.431690477074736
ENSG00000064687.11	256.489065363868	-0.197660328284762	0.624981517951853	-0.316265877641504	0.751800708591926	0.908390965338072
ENSG00000064692.17	29.4146220617265	1.52349252743257	0.817576666702482	1.86342466643189	0.0624025423123452	0.289470441565018
ENSG00000064703.10	271.615339623948	-0.537343143011821	0.495384909136016	-1.08469824797244	0.278055324110304	0.610163680782558
ENSG00000064726.8	1225.06553955032	0.00142708428971549	0.40272146432273	0.00354360126325888	0.99717262117969	0.998807480137784
ENSG00000064763.9	71.9955632634155	-0.312896637044009	0.675997896719918	-0.462866287842386	0.643460213273778	0.859427930492361
ENSG00000064787.11	50.600594718655	-1.33149368937385	0.970296810240232	-1.37225401065082	0.169984376901483	0.484432029588147
ENSG00000064835.9	1.21403118287724	0.730542949424052	2.21675513404499	0.329555095285155	0.741736157391371
ENSG00000064886.12	11.5583471837477	0.578584647328771	0.937264168754843	0.617312244100211	0.537028792271392	0.803432400849546
ENSG00000064932.14	1007.18163781522	0.105270782534505	0.523680238761728	0.201021109338447	0.84068206810715	0.943923725593993
ENSG00000064933.15	199.030643765548	-0.0721202988485317	0.441091510789845	-0.16350416429323	0.870121494641707	0.955372264562068
ENSG00000064961.17	1937.32731885038	0.0638980896657448	0.446794314636959	0.143014554063126	0.886278686869429	0.962012326912103
ENSG00000064989.11	342.263786458372	0.00667383739764888	0.756138974790082	0.00882620473240604	0.992957798947109	0.997400550504026
ENSG00000064995.15	815.37505569433	-0.353415837052908	0.4382564478776	-0.806413319791278	0.420004569288552	0.729051854971151
ENSG00000064999.13	651.75780897468	0.673458438341892	0.576137650787565	1.16891933276933	0.242436133570322	0.574093033573048
ENSG00000065000.14	4403.6272465257	-0.470436690554566	0.434302320989002	-1.08320095891562	0.27871923421034	0.610817424790661
ENSG00000065029.13	899.314613392204	-0.39419483238745	0.39997834969761	-0.985540424089122	0.324358685292016	0.65293060271809
ENSG00000065054.12	14177.2222418908	0.828784773147416	0.635464821858475	1.30421817957375	0.192159203134611	0.513371022190436
ENSG00000065057.6	2063.29879458892	0.709775851634508	0.607096353434667	1.16913212806983	0.242350401348235	0.574021212625689
ENSG00000065060.15	403.182071792629	-0.399154162344232	0.528127105032411	-0.755791851129732	0.449774003244524	0.750420067019315
ENSG00000065135.8	2233.81684934473	-0.152758249045306	0.424037668044965	-0.360246885022271	0.718662515914025	0.89301843901894
ENSG00000065150.17	3373.00150262588	0.350875138783529	0.610337505867638	0.574887067254264	0.565367677009893	0.820315284017025
ENSG00000065154.10	2960.03886802754	3.34739630064044	0.988232968679675	3.38725422722207	0.00070595937425571	0.0152432282448079
ENSG00000065183.14	756.710635485824	0.146695576939406	0.557518747521101	0.263122231479495	0.792456369269587	0.925095984332699
ENSG00000065243.17	701.446671705134	0.587767423597937	0.583227165965972	1.00778471562525	0.313557825015818	0.644201763104805
ENSG00000065268.9	1866.89385867874	-0.399172508272522	0.589974100779135	-0.676593273747721	0.498664047927869	0.779580284179496
ENSG00000065308.4	913.306995629237	1.62827857633666	0.559329758479702	2.91112452296912	0.00360130461237739	0.0491099339221494
ENSG00000065320.7	685.87847612305	-0.260779535166744	0.597641358233337	-0.436347872472587	0.662584353392103	0.867819506863572
ENSG00000065325.11	55.4567286867762	0.0842932615198154	1.10151131202586	0.0765250983803213	0.939001346897618	0.97915487640714
ENSG00000065328.15	33.9835252175273	-1.84704784052605	0.758145253609553	-2.43627171934691	0.0148395327436992	0.125961855401916
ENSG00000065357.18	137.070884590664	0.28194350950504	0.56016953958403	0.503318173484416	0.614740591166646	0.843762444168605
ENSG00000065361.13	6638.28961161115	-0.148413350889319	0.480652022250569	-0.308775047266834	0.757492651635549	0.911057185536054
ENSG00000065371.16	0.160797295611202	-0.552743515465692	4.0804728567969	-0.135460652444968	0.892247672257474
ENSG00000065413.15	260.333853494734	0.381703359620989	0.534358064010845	0.714321323713086	0.47502850948839	0.767137601432106
ENSG00000065427.13	4489.74890215157	-0.44034366543231	0.487057884633091	-0.904088978590353	0.36594822204333	0.68741234852399
ENSG00000065457.9	348.272662110704	-0.323731221288982	0.51051522727539	-0.634126474574968	0.525998286336767	0.79687583411511
ENSG00000065485.16	2485.59659328466	1.67631954278679	0.488428598946638	3.4320667266454	0.000599000159504966	0.013737745730042
ENSG00000065491.8	201.859572534703	-0.320466056816189	0.481789185149661	-0.665158261526026	0.50594927347504	0.784468215698071
ENSG00000065518.7	3545.76454424237	-0.360880608687155	0.385295372940406	-0.936633642737706	0.348947040341113	0.674375241541391
ENSG00000065526.9	1049.75269756159	1.41184857289138	0.544712614625642	2.5919145894238	0.00954434637092675	0.0947707729352983
ENSG00000065534.17	2783.22622537553	0.961305940974973	0.740876186838899	1.29752576483337	0.194450345979476	0.515888184700258
ENSG00000065548.16	1670.33933958792	-0.249508397356768	0.430411330297358	-0.579697558575863	0.562118590048297	0.818914829816814
ENSG00000065559.13	734.360666697168	0.988854764998207	0.719719534304583	1.37394459628454	0.169458883212382	0.483760517128399
ENSG00000065600.11	89.0745494179731	-0.907040078455255	0.671045643715179	-1.35168164334324	0.176477179851026	0.492646538091593
ENSG00000065609.13	0.810177383229873	0.0378360587763282	3.28148317057058	0.0115301699900991	0.990800459220468
ENSG00000065613.12	1132.48007802972	0.319811818318477	0.417725450143032	0.765602905470499	0.443912615155866	0.745847448185678
ENSG00000065615.12	351.076550043952	0.142853565844606	0.541036186099778	0.264036989603983	0.79175141622662	0.924674880732488
ENSG00000065618.15	20.8794187114483	3.01395169565663	1.30822202054163	2.30385335847564	0.0212308766703363	0.157270778656632
ENSG00000065621.13	390.221382140209	-1.8255398199697	0.727079038391743	-2.51078593051959	0.01204627220317	0.109721209790083
ENSG00000065665.19	202.317675892418	0.959104954910106	0.625716585152348	1.53281050505731	0.125322551527407	0.414181990044141
ENSG00000065675.13	25.9764638669333	1.06560879999877	0.651304416846148	1.63611480658896	0.101815561899798	0.371633652587148
ENSG00000065717.13	502.367251651545	0.371612359963971	0.454206005186839	0.818158183115847	0.413266869411133	0.724110628202813
ENSG00000065802.10	562.965121517251	-0.797163028164048	0.46073543067026	-1.73019693103343	0.0835950964885676	0.337011162454481
ENSG00000065809.12	3926.91535433965	0.048087979713467	0.492146294707725	0.0977107421727627	0.922161985357775	0.973842788086613
ENSG00000065833.8	2009.12345853887	-2.74569214195956	0.870532301314872	-3.15403821065847	0.00161028000560276	0.0284732151601936
ENSG00000065882.14	1463.05012918111	0.13258244335836	0.473868521420407	0.279787403816038	0.779640616209599	0.92151929517336
ENSG00000065883.13	893.586414434051	0.538491155569364	0.485362758519461	1.10946121456035	0.267231267354208	0.599260938141281
ENSG00000065911.10	105.087738543219	0.525888268752328	0.713376879171846	0.737181543313862	0.461011955837304	0.75809584164693
ENSG00000065923.8	584.307248170583	0.540045687013059	0.511204670081821	1.05641774932655	0.290777400389635	0.622596178849806
ENSG00000065970.7	403.027999152515	0.341048783821588	0.55215921358339	0.617663846643538	0.536796948371376	0.803251713350257
ENSG00000065978.16	11517.3437941617	-0.458543695157495	0.465837832433374	-0.984341895895881	0.324947436489112	0.653153050287573
ENSG00000065989.14	276.570678682214	-0.706778167587344	0.718728245583658	-0.983373301286344	0.325423745546465	0.653642166486206
ENSG00000066027.10	3458.12008115829	-0.251001100287395	0.449686943221438	-0.55816853050989	0.576729307750833	0.827389493683565
ENSG00000066032.17	77.4288465188412	-6.70160745872894	1.62281746385231	-4.12961260770536	3.633749924528e-05	0.00161552947464261
ENSG00000066044.12	1617.25821518708	-0.12128852992558	0.436923285381149	-0.277596855062954	0.78132184659238	0.922010097385746
ENSG00000066056.12	711.942303539808	0.253158850103659	0.673630616631905	0.375812565303862	0.707056245687724	0.888353855652099
ENSG00000066084.11	1169.75023699408	0.402011348818422	0.566601421110282	0.709513484859713	0.478005886327152	0.768530753779339
ENSG00000066117.13	869.620871596305	-0.356024065923698	0.411559123291743	-0.865061775513895	0.387004883312171	0.703851464435973
ENSG00000066135.11	1115.33251752039	0.338738667333773	0.627553681984372	0.53977640010438	0.589351244278257	0.832350253603766
ENSG00000066136.18	1738.33651788158	-0.328185111648237	0.506446676628843	-0.648015135241479	0.516975161100959	0.791384540693318
ENSG00000066185.11	167.914954353005	0.736952189246901	0.596740563528391	1.234962451504	0.216844478896983	0.543623489061528
ENSG00000066230.9	249.929181269133	-6.56346386077659	2.34555185246737	-2.79825997190054
ENSG00000066248.13	1266.73034043895	-0.675471145891784	0.447233125831009	-1.5103334410587	0.130958362807016	0.424193817720381
ENSG00000066279.15	138.60059646218	-2.20241820649155	0.788133632414278	-2.79447306384441	0.00519843712898685	0.0627631006958812
ENSG00000066294.13	164.307327406194	0.782610800486449	0.517505936836321	1.51227405287522	0.130464159041609	0.423481507266119
ENSG00000066322.11	1848.85594659591	-1.02079097655033	0.476582360099028	-2.14189836220169	0.0322016616951505	0.20037508662198
ENSG00000066336.10	524.278577252945	0.450254436765388	0.511189393805301	0.880797689118093	0.378427330748717	0.696976184115924
ENSG00000066379.13	742.25838289387	-0.630866920011139	0.506751710240245	-1.24492311967147	0.213160011554022	0.539137282662166
ENSG00000066382.15	25.7170541287354	-1.03437635888952	0.798818610124201	-1.29488265017848	0.195360714482398	0.51721123385114
ENSG00000066405.11	1.07924828857559	-1.14781040572577	2.94941115844307	-0.389165953495502	0.697153387338535
ENSG00000066422.4	343.044910095882	0.207799646486967	0.503069741645745	0.413063297759014	0.679560238715316	0.875694709062942
ENSG00000066427.20	433.155636468635	0.317184907792893	0.529341413266796	0.599206674262283	0.549035072604552	0.810661830354455
ENSG00000066455.11	1569.65650694303	0.584012228467383	0.519424580372497	1.12434461235656	0.260866859334047	0.592426853184208
ENSG00000066468.19	1375.57472859304	1.42816179046311	0.76773343209715	1.86023133910155	0.0628528029643721	0.290510100791439
ENSG00000066557.5	392.965845274587	1.00610955352173	0.66280297132869	1.51796174284619	0.12902404334291	0.420821654294615
ENSG00000066583.10	2441.49688605626	0.450876578876858	0.612726993576869	0.735852318574722	0.461820577516194	0.758304745611736
ENSG00000066629.15	147.893965661331	1.01866826148684	0.666218956367063	1.52902923543591	0.126257196486435	0.415901449639606
ENSG00000066651.16	305.076237222908	0.971041801658992	0.527226206258188	1.84179350368533	0.0655053606727692	0.297447531426622
ENSG00000066654.11	738.442867100829	0.145835345172409	0.481790626890264	0.302694442425558	0.762122733527491	0.913195250846353
ENSG00000066697.13	449.679962076709	-0.411893225218011	0.606882824035172	-0.678703052558528	0.49732603162848	0.778666780848056
ENSG00000066735.13	78.0962269024097	0.511168075658086	0.880071540033051	0.580825594745274	0.561358003157396	0.81856541881127
ENSG00000066739.10	939.893519713816	1.82658557727422	0.589709604230362	3.09743230256208	0.00195204976018162	0.0328293551382987
ENSG00000066777.7	1201.07370865244	-0.170271963916119	0.520169082286201	-0.327339647269604	0.74341100850587	0.904709771135356
ENSG00000066813.13	20592.1379827345	0.0127948422220849	0.568587272644575	0.0225028642702015	0.982046827222398	0.993923421049583
ENSG00000066827.14	321.687794021204	-1.3102965994478	0.657481038562777	-1.9929040118207	0.0462719589501303	0.244972533180258
ENSG00000066855.14	1527.88963078962	-0.179962963432509	0.496323947670668	-0.362591739280576	0.716909882020278	0.891964491358639
ENSG00000066923.16	235.918097135021	0.906533993886791	0.892669565498159	1.01553142273972	0.309852575707641	0.640061076126153
ENSG00000066926.9	1244.18082613289	0.260847642273384	0.457345138843309	0.570351841790873	0.568439085813824	0.822502011744424
ENSG00000066933.14	282.262179600722	1.05449851775611	0.597184785208065	1.76578262520321	0.077432324543548	0.32519777648022
ENSG00000067048.15	573.10320293569	1.64666617918419	3.2451924007189	0.507417119188188	0.611862176463407	0.84296294755953
ENSG00000067057.15	1044.73875915186	-3.58180671325519	0.611017027048966	-5.86204075286458	4.57212770288709e-09	9.18489654091096e-07
ENSG00000067064.9	5719.56124353207	-1.21552460758399	0.446447208398359	-2.72266145855121	0.0064758380870142	0.0729490047434372
ENSG00000067066.15	2352.11165176307	-0.00461712508378984	0.495020549391862	-0.00932713821570041	0.992558128322942	0.997214985060871
ENSG00000067082.13	7245.09323710258	0.506065703991665	0.664090010381061	0.762043843576687	0.446033837183882	0.747732199933666
ENSG00000067113.15	2339.78168045819	-0.779098162148765	0.504384610333307	-1.54465093935741	0.122430717742818	0.409221514735509
ENSG00000067141.15	751.898595075903	0.120924914849187	0.529624544349379	0.228321961546812	0.819395952574381	0.935701547552466
ENSG00000067167.6	8097.88344477261	-0.37430836787662	0.514362039731218	-0.727713825989602	0.466788785009741	0.761977991089559
ENSG00000067177.13	84.7567289674182	1.38716447247654	0.574484513144016	2.41462466043675	0.0157514318864883	0.130835783387921
ENSG00000067182.6	6790.23822807186	0.460798899491656	0.483830963714835	0.95239646498368	0.340895951582806	0.666318590448356
ENSG00000067191.14	30.2402506804013	-0.830393600048337	0.802396483696033	-1.03489187318387	0.300719410365282	0.632516561055275
ENSG00000067208.13	760.860671547746	0.954876233666885	0.651547273624724	1.46555172943118	0.142770449858207	0.443880842858319
ENSG00000067221.12	793.542458114015	-0.979085990790828	0.442719913320151	-2.21152462614169	0.0269995284789383	0.180260888498061
ENSG00000067225.16	3217.03670008788	-1.30595438793118	0.610812367560508	-2.13806146910051	0.0325117546333566	0.201535722435802
ENSG00000067248.8	940.838687224493	-0.126550423920736	0.449080911298844	-0.281798715413495	0.778097855984194	0.920882123250767
ENSG00000067334.12	1864.17889484195	-0.723756744922197	0.595884910550553	-1.21459149595431	0.224521933918051	0.553234284870645
ENSG00000067365.13	386.366708804391	-0.228839471351884	0.43275019405476	-0.528802700716817	0.596942324062794	0.836428614238335
ENSG00000067369.12	181.393061924176	0.63898840217945	0.639670441372258	0.998933764718994	0.317826778396043	0.648079866924863
ENSG00000067445.19	280.135863710961	1.72274342644207	0.716388196706584	2.40476243796584	0.0161829819177461	0.133145990021774
ENSG00000067533.5	568.532359485173	-0.965422083466203	0.445859707695633	-2.16530461668281	0.0303643650563412	0.193756242504817
ENSG00000067560.9	11199.1423455692	-0.413864741306921	0.400056073712466	-1.0345168302691	0.300894612884734	0.632655828578079
ENSG00000067596.9	1009.38242483485	-0.375264297708205	0.398963633253186	-0.940597754858671	0.346911032896247	0.672076236245823
ENSG00000067601.7	29.5024727355808	-0.654655500683066	0.626093098107619	-1.04562005660464	0.295736485464084	0.62812518733517
ENSG00000067606.14	489.780024467714	1.15652200616111	0.559725175558108	2.06623188783305	0.0388065892590631	0.223627791380581
ENSG00000067646.10	126.794893326038	1.39000212978874	3.08130630785932	0.451108066161203	0.651911664448037	0.863488186391239
ENSG00000067704.9	4202.950549488	0.480962280038007	0.47906403706212	1.003962399239	0.315396737711019	0.645856311597761
ENSG00000067715.12	176.927533518842	-1.65844005435182	1.36982671919712	-1.21069331697944
ENSG00000067798.12	27.055103360605	0.553631267275194	1.11126721806964	0.49819814557015	0.618344389395523	0.845503237683574
ENSG00000067829.17	2578.63524145393	-0.923038809360899	0.566597426168454	-1.62909107371496	0.103293740590651	0.374025654535246
ENSG00000067836.11	1661.88624328288	-0.610920997242475	0.600826951996128	-1.0168002537383	0.30924846140299	0.639774607411026
ENSG00000067840.11	138.046051314283	0.241757164953717	0.906826832673788	0.266596836620828	0.789779591524048	0.924360123623137
ENSG00000067842.16	0.853096119769398	3.41587543147719	3.66511891417535	0.931995799171978	0.351338696415237
ENSG00000067900.6	796.393343295595	0.684107060507862	0.594088761834362	1.15152331512812	0.249517009082499	0.580307279624961
ENSG00000067955.12	529.131326207279	-0.166438843572961	0.47462938962346	-0.350671170415727	0.72583505640471	0.896590604859746
ENSG00000067992.11	166.206321224919	1.48447425293961	0.53068646148816	2.79727176151586	0.00515361647459231	0.0623849698884938
ENSG00000068001.12	1456.85228441986	-0.338710427111479	0.450872045811298	-0.751234036925054	0.452511819354275	0.752189773449839
ENSG00000068024.15	352.331711293613	-1.36912689840441	0.655251378346547	-2.08946817000103	0.0366656003085652	0.216520648964243
ENSG00000068028.16	642.394634502804	-0.667672698072145	0.52176455529434	-1.27964364634829	0.200670492241477	0.523668316850723
ENSG00000068078.16	1927.57699829524	0.510825102932105	0.491304610486358	1.0397319545331	0.298464450338045	0.631138861065713
ENSG00000068079.6	2347.89295654257	-0.709130998409168	0.534744902857668	-1.3261108139967	0.184802994683198	0.504020838799078
ENSG00000068097.13	167.16336288987	-0.177765981258382	0.562327336605198	-0.316125448091435	0.751907291667992	0.908431584705726
ENSG00000068120.13	4256.52912601376	-0.240673786498985	0.478188844032734	-0.503302804953163	0.614751394664065	0.843762444168605
ENSG00000068137.13	724.408116484084	-0.0385917313795274	0.408750095682721	-0.094413999622603	0.924780295390766	0.974764694492286
ENSG00000068305.16	740.403256749089	1.08849367788583	0.61924059466148	1.75778798623639	0.078783590240266	0.328583001509575
ENSG00000068308.12	2666.94830372673	-0.211853326861008	0.440479039094512	-0.48096119919012	0.630544075625869	0.853524099374773
ENSG00000068323.15	1331.62508223549	-0.317281195178764	0.45165243907175	-0.702489719375479	0.482373810826159	0.770321080500835
ENSG00000068354.14	522.155443030891	-0.41476146190249	0.433124741410509	-0.957602792562214	0.338263090470255	0.663858488612679
ENSG00000068366.18	3286.18153435378	-2.97222108068184	1.14184574411362	-2.60299703003147	0.00924127542533023	0.0928664713422718
ENSG00000068383.17	604.087926840334	0.343332467196404	0.478614695929711	0.717346270635253	0.473160463434148	0.76617206562236
ENSG00000068394.10	1092.4331068221	-0.601886258331919	0.453354885990257	-1.32762715685136	0.184301308512592	0.503475344936941
ENSG00000068400.12	1452.90923648889	-0.0446075449687025	0.393832032798443	-0.113265405690176	0.909820142964392	0.971647915136355
ENSG00000068438.13	649.847972868944	-0.936197047318371	0.439635298140346	-2.12948562428558	0.0332141030132534	0.20369988155708
ENSG00000068489.11	85.0625914590125	-1.4772335348676	0.706485819141898	-2.0909599242372	0.0365316566002518	0.216307341595445
ENSG00000068615.15	214.059680278125	-2.47309872863565	0.967124680903552	-2.55716638967906	0.0105528726830104	0.101218004301765
ENSG00000068650.17	901.187097541662	-0.0085469792703149	0.827288479200244	-0.0103313166872303	0.991756948561288	0.996983816489074
ENSG00000068654.14	968.424945240725	-1.27989936268724	0.41376406183806	-3.09330722683249	0.001979391033366	0.0331364721141271
ENSG00000068697.6	10922.8762425759	0.0738850431838166	0.411205357301122	0.179679184310119	0.857404435983205	0.950063669207948
ENSG00000068724.14	1014.83949711203	-0.184348500110151	0.614303406441905	-0.300093566431468	0.764105786430072	0.913449826673783
ENSG00000068745.13	1595.87627908576	-0.369690288161493	0.52224562280708	-0.707885852971635	0.479016145708493	0.768701043164313
ENSG00000068781.19	1.01443825544488	1.42921477086123	2.35468384405143	0.606966737582126	0.543872986625287
ENSG00000068784.11	305.328121487587	0.274474617198382	0.491171442372688	0.558816318539379	0.576287084313334	0.827177928628966
ENSG00000068796.15	172.590970965353	-0.829951470745322	0.481634958464045	-1.72319607653081	0.0848530730156304	0.339662780838951
ENSG00000068831.17	226.454797701851	0.358469825081615	0.812499624733762	0.441193834642173	0.659072676248208	0.86609059164612
ENSG00000068878.13	2516.47561278773	0.0375622425976099	0.453638191283341	0.0828022051920859	0.9340088156616	0.977485662273603
ENSG00000068885.13	121.468478047301	-0.0453098159162387	0.582968710807989	-0.0777225519589889	0.938048754498647	0.978640932738245
ENSG00000068903.18	2013.75010509389	0.0527419838214384	0.396393577870815	0.133054587071608	0.894150209991385	0.965436595798402
ENSG00000068912.12	1722.56420233622	-0.144418402881595	0.423013908813	-0.341403438215167	0.732799887108325	0.899722727791469
ENSG00000068971.12	403.066421587927	-0.814560251807029	0.470417819070457	-1.73156759541251	0.0833505799501204	0.33661890367086
ENSG00000068976.12	19.9775099150475	-0.170811295684037	0.857755045483942	-0.199137616949447	0.842155096388226	0.944649863860373
ENSG00000068985.4	0.726580474736602	-1.45420094459425	3.97450915540287	-0.365881895785153	0.714453206159721
ENSG00000069011.14	244.238218802752	-5.33173922432772	2.18789781564231	-2.43692332713557	0.0148128198109878	0.125932185979307
ENSG00000069018.16	0.270593865736928	-1.37746071476224	4.04462614405664	-0.340565645798028	0.733430595582749
ENSG00000069020.17	834.598549106855	0.564647078573524	0.539850427004955	1.04593244781918	0.295592222040621	0.628041662447974
ENSG00000069122.17	359.762349896245	0.38010135857738	0.571346035266287	0.66527346846859	0.505875597071027	0.784426228046739
ENSG00000069188.15	261.691829151283	-4.54222342006186	1.25627906978032	-3.61561656906066	0.000299633604187042	0.00816821113281461
ENSG00000069206.14	0.259087728985554	1.3708098361768	4.0804728567969	0.335943868341979	0.736913195371712
ENSG00000069248.11	865.99907232075	-0.134555476212056	0.431719606319974	-0.311673304251854	0.755288818170579	0.909991031525231
ENSG00000069275.12	8780.85807062121	0.342997265090451	0.421992160621032	0.8128048269562	0.416329967614785	0.726391159145951
ENSG00000069329.14	2058.77838383382	-0.576814829966858	0.555437605784603	-1.03848717472426	0.29904330315421	0.631687568308246
ENSG00000069345.10	2423.40084443755	-0.19608663810538	0.517145451985473	-0.379171154561151	0.704560770382704	0.88757064526378
ENSG00000069399.11	3155.09390720113	0.139388670113065	0.636964386377777	0.218832752810131	0.826780332114406	0.937651075552127
ENSG00000069424.13	1416.5747738001	0.187480898858688	0.78895201783674	0.237632827624612	0.812165886958498	0.933534749021197
ENSG00000069431.9	1297.50513402875	3.06885299306767	0.85608838292377	3.58473850864174	0.000337416095550765	0.00886268717805013
ENSG00000069482.6	13.8352197270238	-6.05510697856349	1.93364762730127	-3.13144281981428	0.0017394965606298	0.0301967351050492
ENSG00000069493.13	57.8247104168559	1.200923587614	0.58689586754203	2.04622941484248	0.0407338045950419	0.229600248216349
ENSG00000069509.5	280.047907765482	-0.22756678132678	0.473646012933064	-0.480457504366113	0.630902113392972	0.853576684399348
ENSG00000069535.13	12617.2715870697	0.605765625469345	0.417578134670537	1.45066413965206	0.146873405643862	0.450334286157325
ENSG00000069667.14	1366.15857826624	0.787740161015269	0.747581933444153	1.05371749339381	0.29201227742342	0.624064063335158
ENSG00000069696.6	36.6455819053848	-1.85554652195185	0.896744081331517	-2.06920409131295	0.0385269389630069	0.22272327944082
ENSG00000069702.9	1034.71434026696	1.24429177025987	0.779193890332811	1.59689620991305	0.110288844789025	0.387208044441938
ENSG00000069712.10	59.475488092758	1.30973533391298	0.781938521763245	1.67498504992384	0.0939371649526716	0.356377336283484
ENSG00000069764.8	1.52072663301709	-0.336730653269253	2.36587353790139	-0.142328255451872	0.886820729086482
ENSG00000069812.10	11.5870829167742	-2.07930442421337	1.07274176363389	-1.93830844915535	0.052585602205573	0.262456228537408
ENSG00000069849.9	960.725059926102	-1.13550694209641	0.666077277111332	-1.70476757144595	0.0882377818123768	0.344689757688392
ENSG00000069869.14	1397.5273217636	0.410666472875236	0.577184001514731	0.711500096671952	0.476774390935139	0.767992960556002
ENSG00000069943.8	247.264859059719	-0.186997473064723	0.539818880760445	-0.346407804042162	0.729036260989389	0.898039557055912
ENSG00000069956.10	1198.23654889782	0.356630530576798	0.554632467725039	0.643003342446947	0.520221931056989	0.793342049925056
ENSG00000069966.17	1203.38877482068	-0.50137145197557	0.584041567267871	-0.858451658365638	0.390643113079801	0.707225716069706
ENSG00000069974.14	1277.09192882229	0.702816390263039	0.471326915660978	1.49114418657255	0.135923643478241	0.433384330086502
ENSG00000069998.11	2125.01267548936	0.358262604181943	0.419199884898605	0.854634309521814	0.392753627472334	0.70921204341571
ENSG00000070010.17	2403.88728665483	-0.788487427009353	0.516506631676786	-1.5265775474162	0.126866093675388	0.416782779125003
ENSG00000070018.7	1281.01096304261	0.849899131666407	0.523361364606706	1.62392409746388	0.104392008892043	0.376340986574243
ENSG00000070019.4	47.406534990879	-2.03455721490135	1.24786005127578	-1.63043701320615
ENSG00000070031.3	5.94499910336473	0.0710413834141866	1.22479641364765	0.0580026056760022	0.953746552993814	0.983857227736487
ENSG00000070047.10	1461.88710022569	-0.0433826631230141	0.459910791882635	-0.0943284304015308	0.92484826640381	0.974764694492286
ENSG00000070061.13	1050.20125453224	0.369361568639464	0.424883909215743	0.869323503733613	0.384670210668227	0.70162643847815
ENSG00000070081.14	2420.01098707913	-0.307776229980045	0.53235379740699	-0.578142264560098	0.563168074508972	0.819469563979062
ENSG00000070087.12	340.644089373226	1.75952494068395	0.602064494567402	2.92248580768446	0.00347249446219245	0.0480786470017405
ENSG00000070159.12	2564.12267770663	1.64617063922268	0.596172392449058	2.76123258988942	0.00575836511044703	0.0673859166322863
ENSG00000070182.16	29.6361270497677	-1.00539307638879	0.972962414694305	-1.0333318751112	0.301448615318196	0.632700895612226
ENSG00000070190.11	40.8075771018662	1.11166928443895	0.641842520748913	1.73199694395727	0.0832741065632982	0.33661890367086
ENSG00000070193.4	1.71013000727989	3.34554576565584	2.27282736628536	1.47197530938027	0.141027545164155
ENSG00000070214.14	3229.02446905607	0.820026832246722	0.463685218140179	1.76849897336778	0.0769775236764639	0.324607260191363
ENSG00000070269.12	347.0210922108	0.566040255032412	0.475681262691456	1.18995701413525	0.23406328768551	0.564123204801692
ENSG00000070366.12	194.841618516627	1.74927125569181	0.726146215057257	2.4089793755296	0.0159972019757734	0.13226954804359
ENSG00000070367.14	854.985810924259	0.568687695620398	0.489203369543821	1.16247706173957	0.245041736883904	0.575964251419125
ENSG00000070371.14	316.381100478005	-0.184459975206735	0.55423750915756	-0.332817559546112	0.739272002565501	0.902858691069594
ENSG00000070388.10	7.04168244489219	-2.34727086098467	1.80312529842059	-1.30177911820144	0.192991904140827	0.514444956247712
ENSG00000070404.8	1186.31746381185	-1.19976179096467	0.839279633243954	-1.42951376804819	0.152856620591042	0.460352198826103
ENSG00000070413.17	3059.09640193279	-0.091759408522754	0.47926421149742	-0.19145892040647	0.848166061916164	0.94679002260409
ENSG00000070423.16	1753.07864171509	-1.00753156185389	0.568637154267042	-1.77183561484401	0.0764218487011678	0.323395441665796
ENSG00000070444.13	361.490694019782	-0.424682746241496	0.517986725956174	-0.819871871151825	0.412289153769306	0.723114509475925
ENSG00000070476.13	912.440509016728	-0.140777230228589	0.487540701551756	-0.288749697780145	0.772772928418316	0.917718585480343
ENSG00000070495.13	1304.61874329527	-1.61598514433328	0.553193158500305	-2.92119510066643	0.00348691392350096	0.0482167523800363
ENSG00000070501.10	785.654338241688	-0.460205901145078	0.458225958610611	-1.004320886884	0.315223969197881	0.645685350804119
ENSG00000070526.13	12.3308157862006	3.54111264416937	1.02433555589392	3.45698499265613	0.000546255269212435	0.0127848482425383
ENSG00000070540.11	507.771108448707	-0.0932601055785315	0.5655989400826	-0.16488734148779	0.869032656051118	0.955046728076439
ENSG00000070601.8	39.000030161368	-0.666384326136062	1.12064593941712	-0.594643056024161	0.552082093091532	0.81256177272328
ENSG00000070610.13	1349.5485615046	0.419632502548012	0.396907649299032	1.05725476263588	0.290395332930969	0.622017686175368
ENSG00000070614.13	3626.28953807227	-0.141964470817501	0.518454276242225	-0.273822547759591	0.784220995022999	0.923183212143531
ENSG00000070669.15	325.166588467771	-2.2048979273287	1.03582021315675	-2.12864925719985	0.0332832899646483	0.203987078834183
ENSG00000070718.10	178.004069666793	-0.642919393988171	0.509084435144039	-1.26289344086166	0.206627477481938	0.530594123736315
ENSG00000070729.12	4.03721890508615	-1.46400305425793	1.67218953962242	-0.875500665186856	0.381301548444972	0.699129060269528
ENSG00000070731.8	160.856099583427	-2.15304350067154	0.664024255566829	-3.24241694881106	0.00118520486523001	0.0225761235786044
ENSG00000070748.16	0.518175457971108	2.66290702498796	4.00862997855202	0.664293546482393	0.506502450678016
ENSG00000070756.12	31726.2042068705	-1.31379288294363	0.639570227464349	-2.05418080224328	0.0399581957706938	0.227362448319164
ENSG00000070759.15	269.93056501451	2.09451132456575	0.624233336637909	3.35533397791071	0.000792692210755257	0.0166327371417273
ENSG00000070761.6	1048.87788775544	0.178840520458951	0.422140708639733	0.423651443224298	0.671820032175563	0.871396580302923
ENSG00000070770.7	1562.78190522736	-0.02760946050665	0.453491669759806	-0.060881957371507	0.951453218719026	0.982987096825142
ENSG00000070778.11	428.781397487803	1.45503719201801	0.695020533427313	2.09351684164333	0.0363030422519031	0.215395000410774
ENSG00000070785.15	1233.6731484108	-0.611670538094763	0.586885678719055	-1.04223115382506	0.297304522530381	0.630037011214998
ENSG00000070808.14	13.8351659949554	-1.51581575601695	1.46903193489207	-1.03184670122799	0.302143937613187	0.633416227888443
ENSG00000070814.16	1264.37794902002	-1.03195078418345	0.499723975513275	-2.0650415724471	0.0389190669468244	0.223831366303579
ENSG00000070831.14	4155.77864640744	0.295163497240309	0.419665432540048	0.703330496995705	0.481849809337993	0.769824260927621
ENSG00000070882.11	92.4741886894478	-0.896815478486929	0.615572639910103	-1.4568800176335	0.14514950283605	0.447387926343363
ENSG00000070886.9	1.57753864741607	0.871523048303063	2.70548424396504	0.32213199919649	0.747352697410355
ENSG00000070915.8	1.77318170958102	1.1200214091622	2.02697362684082	0.552558451837302	0.580565798877852
ENSG00000070950.8	311.646438892916	-0.727317444931512	0.416698017192538	-1.74543053943895	0.0809099535673331	0.332550442804661
ENSG00000070961.13	658.773677824934	0.822987960516169	0.485358585025568	1.69562872875282	0.089956213575649	0.348671555700667
ENSG00000070985.12	1.59166596832672	-3.92130518369256	2.55052963752993	-1.5374474093507	0.124183784217228
ENSG00000071051.12	333.864502535698	0.72662012819776	0.72836108727598	0.997609758252283	0.318468627357139	0.648623801089797
ENSG00000071054.14	3505.01107377216	-1.09852805222249	0.605446083965757	-1.81441102901679	0.0696144690273555	0.307403578300966
ENSG00000071073.11	760.076640712457	-0.167924827895822	0.499511722408164	-0.336177952113418	0.736736678012056	0.901536320707815
ENSG00000071082.9	27672.4293277682	-0.169936282584612	0.597271137034348	-0.284521169779612	0.776011012977913	0.919405550218691
ENSG00000071127.15	6702.18453606736	-0.498308834360926	0.434074457147228	-1.14798008995012	0.250976783195482	0.582158407731279
ENSG00000071189.20	543.933923730794	0.925087518453377	0.452280229982236	2.04538570808128	0.0408168468394811	0.229668639912951
ENSG00000071203.8	0.259087728985554	1.3708098361768	4.0804728567969	0.335943868341979	0.736913195371712
ENSG00000071205.10	449.960695871938	1.96130571063192	0.704981114249995	2.78206844266812	0.00540136478507668	0.0645476597505058
ENSG00000071242.10	501.469095681904	0.874658400316941	0.593497780937856	1.47373491259696	0.140552978867733	0.440374889695959
ENSG00000071243.14	177.177135956522	1.005839430814	0.572414291329445	1.75718783763752	0.0788857976408326	0.328630235333238
ENSG00000071246.9	309.124344860948	-0.466957203371641	0.586554395683765	-0.79610212932987	0.425972676630055	0.732949631490567
ENSG00000071282.10	434.214341401339	-0.306381504760369	0.659729808005349	-0.464404519915045	0.642357952380151	0.858918449301358
ENSG00000071462.10	2854.0304406628	-0.280174859972458	0.499799085742929	-0.560574974954166	0.575087315278636	0.826677074195937
ENSG00000071537.12	5059.63677134361	0.298076031278805	0.564661337672981	0.527884612230055	0.597579425502662	0.836685076972877
ENSG00000071539.12	81.4814823768036	-3.07624939892572	0.613149161365198	-5.01713056587461	5.24489252111173e-07	5.36760321405849e-05
ENSG00000071553.15	4381.59534207191	-0.92417358988405	0.405453511337929	-2.2793577168303	0.0226458096616155	0.16306786804461
ENSG00000071564.13	892.443685898602	-0.908908822939872	0.409380561277953	-2.22020513163242	0.0264048461364027	0.1784115670431
ENSG00000071575.10	931.687574503754	-1.73198316800817	0.993405849906774	-1.74347993639328	0.0812498159540255	0.333005547371633
ENSG00000071626.15	2811.03467156234	-0.317235368712103	0.405724600553282	-0.781898283415629	0.434274353926659	0.739155596045564
ENSG00000071655.16	3614.07978840868	-0.234366786086002	0.582749733183146	-0.402173991236038	0.687555981935954	0.87959327458735
ENSG00000071677.1	0.130813829777563	-0.552743515465693	4.0804728567969	-0.135460652444968	0.892247672257474
ENSG00000071794.14	814.71399990182	0.0218942305290813	0.551251004897318	0.0397173525935968	0.968318467223042	0.989424522013674
ENSG00000071859.13	3736.25263221466	-0.998018157896629	0.574254386180049	-1.73793737046654	0.0822218499449735	0.334656521892828
ENSG00000071889.15	3150.18113236744	-0.188441145157036	0.555025129838215	-0.339518221836127	0.734219372395805	0.900254494461487
ENSG00000071894.13	3244.96996705792	-0.970001742453663	0.568000190547122	-1.70774897367431	0.0876829307486103	0.34352897579646
ENSG00000071909.17	29.357364584832	-0.844801547765701	1.2715812692349	-0.664370865004963
ENSG00000071967.10	814.25413598651	1.28778456449938	0.544887482796529	2.36339538924638	0.0181083382594363	0.142301441779204
ENSG00000071991.7	66.4056234835336	1.28286484236891	0.859805955879536	1.49203995808171	0.135688670481152	0.432926675699864
ENSG00000071994.9	1164.84580731858	-0.26582220700874	0.492324088862975	-0.5399333752339	0.589242980095281	0.832350253603766
ENSG00000072041.15	1.57773300335353	0.385052505336895	2.33837741412704	0.164666534585325	0.86920645888199
ENSG00000072042.11	8807.57367641408	-0.626331286815283	0.804598217543056	-0.778439814007873	0.436309774980455	0.740702416117054
ENSG00000072062.12	3813.30872487598	0.584502997112232	0.547896051467892	1.0668136693927	0.286055984694533	0.618031332795518
ENSG00000072071.15	931.996381059913	-3.82791851214304	1.07593131995561	-3.55777217480848	0.000374013482987557	0.00956960742213711
ENSG00000072080.9	6130.53080111874	2.68543450995861	0.820180124617498	3.27420090947826	0.00105961244546315	0.0207672552997005
ENSG00000072110.12	3994.85746130666	0.563483235262824	0.654986225722355	0.860297840067375	0.389624883216419	0.706439588059924
ENSG00000072121.14	541.974812642755	-0.200533560368275	0.498981641365215	-0.401885648176584	0.687768185411863	0.87959327458735
ENSG00000072133.9	22.7491109076116	7.19543845251404	1.39807678500127	5.14666900252371	2.65152582979744e-07	3.07633713386553e-05
ENSG00000072134.14	514.260111868575	0.0571141863113199	0.442370513840852	0.129109388000185	0.897271093635452	0.966881575817759
ENSG00000072135.11	1832.52010840486	0.133362059393347	0.427023470587884	0.312306157808486	0.754807860682703	0.909924180377033
ENSG00000072163.17	1952.89338245996	0.858224851825102	0.604544845005604	1.4196214870001	0.155717906501337	0.464392536007285
ENSG00000072182.11	0.319445460522831	0.409037163963165	4.0804728567969	0.100242589111168	0.920151735052521
ENSG00000072195.13	22.6345670082351	-0.477541698454532	0.882684131087278	-0.541010857265898	0.588500099218075	0.831797925253118
ENSG00000072201.12	192.073838262532	1.37168233325653	0.593508106077617	2.31114338491806	0.0208249362877453	0.155424085895742
ENSG00000072210.17	17435.5304350777	0.181618091654485	0.511549050325697	0.35503553674638	0.722562968722326	0.894687745924815
ENSG00000072274.11	2246.03304453292	-1.91554380554735	0.547280719905757	-3.50011198252555	0.000465062745944368	0.0113243561571369
ENSG00000072310.15	12638.3911571372	0.218365893512058	0.736425123073201	0.296521515453992	0.766831838414226	0.914633511062949
ENSG00000072315.3	23.8642768360849	-0.184317773159541	1.07410554894948	-0.171601173962663	0.863751084456752	0.952426485483518
ENSG00000072364.11	3378.8664426833	0.138815682258785	0.456570554592278	0.304039936133744	0.761097465808153	0.912963488592563
ENSG00000072401.13	344.010009598716	-0.363362986209512	0.469286928548295	-0.774287464885393	0.438760814772244	0.742134141833524
ENSG00000072415.7	855.91401965903	0.546370764223295	0.529896505332823	1.0310895782944	0.302498814532511	0.633431382131306
ENSG00000072422.15	464.955947458772	0.162513568616799	0.938897218366855	0.173089839268541
ENSG00000072501.16	1579.30514548148	0.545504126385974	0.518114124095392	1.0528648052944	0.292402958418379	0.624529886379715
ENSG00000072506.11	8913.34844823146	0.48848065459831	0.429791104156375	1.13655366496507	0.255724919337271	0.587017834279633
ENSG00000072518.19	742.196044648156	-0.360564775614243	0.462025470269305	-0.780400213442946	0.435155342283908	0.739900494215648
ENSG00000072571.18	110.881865996751	-2.40345789967068	0.814497590103405	-2.95084715887931	0.00316903690660894	0.0452040925218852
ENSG00000072609.16	521.223294628442	-0.692205193573992	0.470741969758639	-1.47045565945374	0.14143838626937	0.441595514246691
ENSG00000072657.7	17.9374170184955	3.64631410096496	1.50129019977239	2.4287869870314	0.0151494300992319	0.127708086218663
ENSG00000072682.17	2492.40783692077	-3.24017438084524	0.774846611623694	-4.18169781249406	2.8934036338468e-05	0.00134135224871667
ENSG00000072694.17	567.388050851019	2.5679154688727	0.734939697791804	3.49404920783058	0.000475753319168659	0.0114943697245916
ENSG00000072736.17	594.068556408797	0.216051590486326	0.629592729240379	0.343160872818526	0.731477438359534	0.898954033230342
ENSG00000072756.15	299.628530566648	-0.699523754595566	0.501234554800167	-1.39560161584321	0.162834495596131	0.475178460110374
ENSG00000072778.18	36707.1543962866	0.537973525670486	0.60387824960056	0.890864219776639	0.373002017588062	0.693961558085599
ENSG00000072786.11	886.363813308535	-0.556065483843361	0.486360581959347	-1.14331938991273	0.252906007343745	0.584214736747419
ENSG00000072803.16	1233.64714106819	-0.276616973536077	0.444140146827461	-0.622814612711733	0.533406354562604	0.80121740989963
ENSG00000072818.10	232.93793233264	0.330152206580955	0.483161335927479	0.683316693682025	0.494406747791332	0.777011865272057
ENSG00000072832.13	179.428831356053	-1.1783576110496	1.10816467309742	-1.06334161307993	0.287627060387823	0.619250115829595
ENSG00000072840.11	330.459473364554	0.355231325146851	1.1934452971367	0.297651954387117	0.765968816911129	0.914056402381819
ENSG00000072849.9	1757.84565153216	-0.145777195515151	0.437225237276509	-0.333414412267695	0.738821485530639	0.902817903354931
ENSG00000072858.9	23.1172145519906	0.883480341079629	0.674119206519167	1.31056990000553	0.190003114069876	0.510592958867877
ENSG00000072864.11	128.60194243846	-0.22236696049692	0.482942632690627	-0.460441769777174	0.645199158959988	0.860265545279984
ENSG00000072952.17	108.56273261044	-0.93581896466808	0.81288959681819	-1.15122517046726	0.249639612651364	0.580325836931748
ENSG00000072954.5	677.442345809947	-0.917991439117176	0.644438976849115	-1.42448156007812	0.154307119282194	0.462290505268507
ENSG00000072958.7	4491.3235749334	-1.22235386470461	0.624231268703668	-1.95817467978344	0.0502095191453475	0.256180393955567
ENSG00000073008.13	1996.1884255377	-0.14574673286043	0.437801354594041	-0.332906080191496	0.739205179657394	0.902858691069594
ENSG00000073050.10	709.705003416535	-0.366583556170679	0.423786625891997	-0.86501917185113	0.387028266127543	0.703851464435973
ENSG00000073060.14	20073.4549634212	-1.18164139682179	0.766901961154781	-1.54079850707711	0.123365832918113	0.41058638620351
ENSG00000073067.12	9.7858584948395	-2.59348935096153	1.4842319954269	-1.74736116655104	0.0805747091446598	0.331951350665955
ENSG00000073111.12	485.368102922691	-2.07508142640841	0.430920741431662	-4.8154596121651	1.46861466600764e-06	0.00012317958665776
ENSG00000073146.14	38.835065498988	0.485465060360558	0.680489434820282	0.713405727583074	0.475594729901553	0.767289058591916
ENSG00000073150.12	1321.1239529502	-0.95173111126244	0.585744853260873	-1.62482197831377	0.104200496561668	0.376162058802323
ENSG00000073169.12	4071.61662362698	0.159077878652149	0.635938971582401	0.250146453922012	0.802474092583474	0.929997217706909
ENSG00000073282.11	30.7976842812855	0.100525097976362	1.36390075835552	0.0737041147316073	0.941245824614504	0.980093742255483
ENSG00000073331.16	266.559401511824	0.518167220259917	0.717655627464072	0.722027669581477	0.470277466010281	0.764474382782228
ENSG00000073350.12	3287.71946715313	-0.722646242574596	0.405512378207453	-1.7820571736158	0.0747399086985546	0.319518632339673
ENSG00000073417.13	1327.27368539403	1.24157586207081	0.552938510138593	2.24541398239672	0.0247415686173411	0.171396437266602
ENSG00000073464.10	340.61820657459	-0.0565247607665556	0.564672674425289	-0.100101817082056	0.920263492757392	0.973810502797853
ENSG00000073536.16	612.465797361012	-0.760113327242407	0.601875657521466	-1.26290757524995	0.206622397231725	0.530594123736315
ENSG00000073578.15	13912.4827410354	0.170909590489585	0.450019672047952	0.379782487533953	0.704106883014516	0.887138287099568
ENSG00000073584.17	1380.62754934126	-0.0535288389839247	0.378711049017414	-0.141344803968113	0.887597556427785	0.962817688328445
ENSG00000073598.5	0.571171197307494	-2.44404958747917	3.52837464840429	-0.6926842614586	0.488507718089191
ENSG00000073605.17	545.796338588702	-0.480011677567631	0.481343033636984	-0.997234080528197	0.31865090208884	0.648623801089797
ENSG00000073614.10	930.288460084564	0.234471504691187	0.610329340047467	0.384172100710333	0.700850895076776	0.885656449065788
ENSG00000073670.12	20.607561838754	-2.53548966448799	1.17018631379854	-2.16674014606917	0.0302546736028164	0.193305355648273
ENSG00000073711.9	101.049767846667	-0.155574727009686	0.677440659878622	-0.229650707764663	0.81836320064944	0.935196183133865
ENSG00000073712.12	2359.68259792805	1.58810257526675	0.679262801296214	2.33797960411821	0.0193883062108976	0.147751560081361
ENSG00000073734.8	1426.37433669868	2.40083953344427	0.841764331629626	2.8521516572178	0.00434243775367434	0.0554537926505419
ENSG00000073737.15	68.0193392175194	0.12693843623428	0.52541433445958	0.241596827320754	0.809092580706133	0.932784559806592
ENSG00000073754.5	2912.36988137993	3.61159158513762	1.29629310372075	2.78609179881562	0.00533477615540569	0.0640018619481449
ENSG00000073756.10	58.0511038967582	2.03256414985512	1.01380838918308	2.00487998673294	0.044975878737402	0.242195778320236
ENSG00000073792.14	204.898703386766	-1.84911214382972	0.570429968478925	-3.241611145993	0.00118856076671361	0.0226003631854675
ENSG00000073803.12	1638.29309049915	-0.235992556843686	0.378262347792938	-0.623885930546988	0.532702500787398	0.800605718604601
ENSG00000073849.13	28521.8516997424	1.04456476265424	0.552202007442563	1.89163521424338	0.0585396006581386	0.278990483519936
ENSG00000073861.2	33.5711902458334	2.11562172569195	0.713988920431746	2.96310161845739	0.00304556007633774	0.0440216331886899
ENSG00000073905.8	2.14168514169915	-0.188517644368328	1.72815924314374	-0.109085806250928	0.913134432673026
ENSG00000073910.18	1190.98809156277	-0.654429363074707	0.700999957771882	-0.933565481451385	0.350528078122698	0.675564659872295
ENSG00000073921.16	3272.64579376127	0.672502444326644	0.431616148522371	1.55810306595094	0.119208818036021	0.403375546487378
ENSG00000073969.17	869.604253732789	-0.327240693206592	0.396586481883438	-0.825143337343434	0.409290218150821	0.720951576926217
ENSG00000074047.19	19.1606953609829	1.06169703281669	1.01611386897937	1.04486029098599	0.296087544754698	0.628501019400785
ENSG00000074054.16	1014.63207606671	0.322244579407414	0.539237555868467	0.597592982722474	0.550111547628683	0.811312632543805
ENSG00000074071.12	4012.85752920173	-0.595674738940055	0.514143570399012	-1.15857665686215	0.246628788450414	0.57717289061283
ENSG00000074181.7	584.83367650346	-1.98360235570293	0.784158143153708	-2.52959479286325	0.011419432258736	0.10642439960719
ENSG00000074201.7	2644.15900101783	-0.0760808985563605	0.419380762634371	-0.181412466510034	0.856043834369222	0.9493256733253
ENSG00000074211.12	385.254442170388	-7.34958071301753	0.735263557860182	-9.99584521012685	1.58925614721344e-23	3.83116681888254e-20
ENSG00000074219.12	531.545000548397	-0.927431290251202	0.629856208887557	-1.47244923073668	0.140899607190276	0.440678539660096
ENSG00000074266.16	330.821665597091	-0.440656443240409	0.472552427318498	-0.932502761102968	0.351076760415066	0.676084333754168
ENSG00000074276.9	2978.61658690222	1.60810603784376	1.25859504955989	1.27769931909878	0.201355465415917	0.524661881823407
ENSG00000074317.9	2.45970347960818	-3.43165854484805	2.41891482758394	-1.41867688176341	0.155993240136905
ENSG00000074319.11	2274.9802390699	-0.343279186463908	0.393929638178133	-0.871422592246483	0.383523454549118	0.701370784591726
ENSG00000074356.15	571.412954229796	0.68106249400153	0.459378025892229	1.48257525526767	0.138187295526648	0.437319927288425
ENSG00000074370.16	352.424336379232	0.448005580816136	0.613747209817538	0.72995131163093	0.465419946130955	0.760888490035204
ENSG00000074410.12	327.282571566776	-5.93784548585899	1.19983202814891	-4.94889730108291	7.4635112517359e-07	7.26136054339291e-05
ENSG00000074416.12	5476.40534283295	0.723250564236994	0.565198670827009	1.27963953485368	0.200671938896428	0.523668316850723
ENSG00000074527.10	553.205632091978	1.71482063682786	0.610787084106272	2.8075587736716	0.00499185698128728	0.0610847879672921
ENSG00000074582.11	1097.65419872612	-0.652225296115929	0.53446104395133	-1.2203420688886	0.222335228317534	0.550507059914796
ENSG00000074590.12	385.946670312453	-0.021238911452518	0.63894635091639	-0.0332405239063604	0.973482782560934	0.991255570959873
ENSG00000074603.17	485.835539270995	0.0432549780229477	0.455758251014519	0.094907723396476	0.924388121830911	0.974610005405941
ENSG00000074621.12	219.983524609961	0.707442222116018	0.536902531471706	1.31763622007303	0.187625454622872	0.507761240301589
ENSG00000074657.12	152.153605919994	-0.639447929217783	0.617810443097793	-1.03502285589654	0.300658237383107	0.632457029068881
ENSG00000074660.14	286.453979093489	0.681985078164618	0.464616154355763	1.46784624634987	0.142145992187144	0.442823720290268
ENSG00000074695.5	7042.66262190131	1.09695895070845	0.643202695138519	1.70546385921504	0.0881079471360235	0.344370976265331
ENSG00000074696.11	6571.49437202082	-0.436479538162404	0.465021495819094	-0.938622283242164	0.347924707852051	0.67343870653565
ENSG00000074706.12	44.5233434066135	2.34912287828048	0.63577431149178	3.69490058943795	0.000219972834298033	0.00639749411920928
ENSG00000074755.13	839.614096499598	0.473397325540968	0.526179711054471	0.899687531836362	0.368286560413452	0.68971473584206
ENSG00000074771.3	0
ENSG00000074800.12	29832.2445276486	-0.442292827573058	0.437828878412592	-1.01019564807294	0.312401563882487	0.642897550965837
ENSG00000074803.16	28.2336216278651	-0.355096259726517	1.5980933081248	-0.222199954108554	0.824158229839782	0.93670949184355
ENSG00000074842.6	6607.9297376476	-0.216696807952783	0.609911948055272	-0.35529195426279	0.722370882366402	0.894687745924815
ENSG00000074855.9	227.067587840198	-0.0960702764613974	0.5815677459476	-0.165191892313184	0.86879294659427	0.954923309612893
ENSG00000074935.12	649.209257399427	2.60610448877719	0.693603763608031	3.75733902483544	0.000171729767324447	0.00526994205356606
ENSG00000074964.15	2836.55804349297	1.46232883557609	0.499073857608453	2.93008502305356	0.00338869270640526	0.0473510205085191
ENSG00000074966.9	17.2232466889561	0.852655721411999	0.870974988453714	0.978966942467271	0.327596313587594	0.655676164169412
ENSG00000075035.8	3.38874571119244	0.380719235867601	1.62560007596032	0.23420227490005	0.814827949013631	0.934014105184059
ENSG00000075043.16	1.8176853841904	-2.93153650110872	2.68876519620976	-1.09029100244275	0.275584977371476
ENSG00000075073.13	30.3023364058527	-1.49268913523847	1.25971169030657	-1.18494505268519	0.236039172773191	0.566556686855533
ENSG00000075089.8	714.201402491304	-0.352813986873023	0.523036940274446	-0.674548888818246	0.4999624150123	0.780455085162229
ENSG00000075131.8	112.15787547979	-0.481672935430184	0.598511015219881	-0.804785414439244	0.420943519867035	0.729732306356383
ENSG00000075142.12	949.192178088025	0.516358738487426	0.620414237289952	0.832280607780611	0.405250573916373	0.717732301571529
ENSG00000075151.18	823.591546523069	0.709970189472069	0.427342478078006	1.66136114683753	0.0966409361054473	0.362315837177084
ENSG00000075188.7	411.245225563564	-0.910730664188964	0.527656981037553	-1.72598998386823	0.084349214702414	0.338535737471998
ENSG00000075213.9	12.7043111290201	0.38871485628309	1.20976976833328	0.321313084900962	0.747973141415079	0.906796226874248
ENSG00000075218.17	36.5470953809007	-2.35160630122744	0.680032487599403	-3.45807934783954	0.000544041126181743	0.0127605581336639
ENSG00000075223.12	33.3389636545273	0.352794965495088	1.06986482353174	0.329756580210269	0.741583897826903	0.903947978665846
ENSG00000075234.15	9246.47534543897	0.958829096379379	0.485090492225994	1.97659841152417	0.0480870418594554	0.250913049587
ENSG00000075239.12	22423.5904330484	1.61264512837197	0.540589218137075	2.98312484649492	0.00285321582631451	0.0419968592725371
ENSG00000075240.15	1789.90283681549	0.845701152152659	0.598002205746226	1.41421075712812	0.157300030462364	0.466481883667503
ENSG00000075275.15	463.507713756574	-0.573737476914132	0.904512973087914	-0.634305415162208	0.525881523183726	0.796865870023336
ENSG00000075290.7	2.06626312192976	1.43847014659555	2.97284526039827	0.483869835324979	0.628478249307847
ENSG00000075292.17	2473.35182453611	0.40236816192159	0.44373307314785	0.90677974275657	0.364523284288159	0.685906139009606
ENSG00000075303.11	275.853741827044	0.73059373514615	0.530364181511142	1.37753219507491	0.16834776803256	0.482556899885641
ENSG00000075336.10	678.33769663376	-0.125402299749375	0.42575494532033	-0.294541029124217	0.768344516380106	0.915466878298581
ENSG00000075340.21	12.4588715722813	0.275822399395578	1.23671641290483	0.223028009103332	0.823513707361542	0.936570393401269
ENSG00000075388.3	1.22215549890707	-3.54548925534806	3.22383825352778	-1.09977268601125	0.271431175970043
ENSG00000075391.15	244.347769388838	-0.119822909425461	0.665276064655829	-0.180110056247777	0.857066167969842	0.949846841250077
ENSG00000075399.11	749.770512386326	-0.218785337619974	0.524743990196557	-0.416937290769204	0.676724276548346	0.874565755539249
ENSG00000075407.16	298.561618017756	0.494048350923755	0.582498268240736	0.848154196948744	0.396352101812917	0.711030525714526
ENSG00000075413.16	1011.59409850115	0.107913510088187	0.483781934849043	0.223062297937727	0.823487020967465	0.936570393401269
ENSG00000075415.11	18787.8752990557	-0.743695051676096	0.503679485430638	-1.4765244032924	0.139803169058652	0.440163917558628
ENSG00000075420.11	1907.31008492935	0.269729403247355	0.517575862089501	0.521139842492717	0.602269357513883	0.838477668161011
ENSG00000075426.10	1321.28443591822	0.185049761559537	0.708445770328629	0.26120525989406	0.793934222081421	0.925593515437069
ENSG00000075429.7	0.259087728985554	1.3708098361768	4.0804728567969	0.335943868341979	0.736913195371712
ENSG00000075461.5	338.772206743387	-7.45711920042744	2.163641954876	-3.44655879112624
ENSG00000075539.12	485.73701149565	0.879316529393664	0.468890846506084	1.87531178299991	0.0607498432833273	0.285354472813572
ENSG00000075568.15	1125.21543319983	0.282192527395655	0.463069580332539	0.609395519336439	0.542262307115153	0.806708385007063
ENSG00000075618.16	864.366178675852	0.0419637285328253	0.648579314098394	0.0647009974272153	0.948412068656419	0.982183686948433
ENSG00000075624.12	94270.1730093599	-0.220288208678376	0.436668181518136	-0.504475063679966	0.613927581074547	0.843762444168605
ENSG00000075643.5	1579.74882353959	0.027000359431773	0.434129463401452	0.0621942570315827	0.950408135862889	0.982609240680545
ENSG00000075651.14	953.465522404799	2.65327461395314	0.477787624614079	5.55325102046387	2.80404954211669e-08	4.67974298967414e-06
ENSG00000075673.10	0.130813829777563	-0.552743515465693	4.0804728567969	-0.135460652444968	0.892247672257474
ENSG00000075702.15	110.876322960119	-2.21447661763967	0.641632926354756	-3.45131386916277	0.00055786439708583	0.0130004575286511
ENSG00000075711.19	1118.22002160433	0.560073705694131	0.502395719272734	1.11480588748824	0.264933612987381	0.596327385348503
ENSG00000075785.11	7454.68675491208	0.113482888542478	0.393052069314133	0.288722277281234	0.772793913573278	0.917718585480343
ENSG00000075790.9	1184.58316074636	0.123582117044989	0.470662911902247	0.262570332014298	0.792881769503678	0.925143947251457
ENSG00000075826.15	125.259753128248	-0.262099668701213	0.685186232482039	-0.382523256125237	0.702073282218642	0.886176512854474
ENSG00000075856.10	935.98723095813	-0.562792553716598	0.511554016216741	-1.10016251632388	0.271261319151974	0.603481417499477
ENSG00000075884.11	248.533810694516	0.990177119670934	0.525134501983052	1.88556858468022	0.0593531141281743	0.281293033864251
ENSG00000075886.10	46.8760952153237	-3.6275962138688	1.49468063052162	-2.42700423073178
ENSG00000075891.20	69.4012303534114	-6.22556192842498	2.98833068871031	-2.08329083255233
ENSG00000075914.11	1006.62147223874	-0.220265032154199	0.43076740736921	-0.511331703341729	0.60911880909027	0.841779196302264
ENSG00000075945.11	848.187985041865	-0.453166028080816	0.397296351168356	-1.14062469173996	0.25402613747948	0.585496242848299
ENSG00000075975.14	542.880073952166	-0.000715597390302093	0.49547765898181	-0.00144425763166118	0.998847649534487	0.999354328074716
ENSG00000076003.4	626.076724019016	-1.61952786392191	0.48078491986022	-3.36850803139325	0.000755761951235197	0.016028359036167
ENSG00000076043.8	1382.23162506207	-0.304185440149931	0.415194857707448	-0.73263296619214	0.463782318890904	0.759699599143606
ENSG00000076053.9	709.215546326324	0.732846735514568	0.503630308518819	1.45512834140161	0.145633734366204	0.448181549776711
ENSG00000076067.10	254.585078429535	0.399427731321267	0.447990950887628	0.891597766717967	0.372608567628197	0.693498797568959
ENSG00000076108.10	1246.68214486415	0.19345692461602	0.529257815875999	0.365524927196059	0.71471960296392	0.891006054105558
ENSG00000076201.13	1522.95519293096	-0.819589817074676	0.495089150243964	-1.65543885716503	0.097835509422807	0.3650282394561
ENSG00000076242.13	882.075939026152	-0.139038172236477	0.426248935352967	-0.326190075105625	0.744280550023694	0.904898336414349
ENSG00000076248.9	1383.7049561999	-0.0139819865749159	0.470234343292891	-0.02973408211107	0.976279130337398	0.992270656789198
ENSG00000076258.8	1141.31836797256	1.0172277521573	0.745910975506314	1.36373881811676	0.172649782152379	0.487967204372488
ENSG00000076321.9	380.276172649892	1.13732775013753	0.627325181045292	1.81297959097137	0.0698349691714098	0.307690656783165
ENSG00000076344.14	28.8559349629913	0.718734142956101	0.866874352901744	0.829109940270163	0.407042199464541	0.719445015037286
ENSG00000076351.11	1217.26497540297	-0.341861796672407	0.43548961979041	-0.785005614684769	0.432450276647472	0.737686467177658
ENSG00000076356.6	603.091288975339	-0.184588129254108	0.508675727191026	-0.362879766788614	0.716694701776367	0.891869778057463
ENSG00000076382.15	460.558644986101	0.494946255822914	0.475505804907739	1.0408837299451	0.297929513694834	0.630668997392087
ENSG00000076513.15	922.038205325086	0.132493592423076	0.480865156386255	0.275531696700125	0.78290777740175	0.922547413739983
ENSG00000076554.14	1675.77565268497	-0.742489912787013	0.46648979572761	-1.59165306419813	0.1114626798867	0.389607351637777
ENSG00000076555.14	5551.78126425292	1.1643548785713	0.635542172589811	1.83206548485461	0.066941664873165	0.300448150825029
ENSG00000076604.13	2039.57453061734	-0.24607272892532	0.538934873629045	-0.456590844211531	0.647965161311904	0.861401811685091
ENSG00000076641.4	430.500238426448	-0.328662704654189	0.505241517079942	-0.650506131312614	0.515365342549173	0.790427346008718
ENSG00000076650.5	252.541541780946	-0.167833596313646	0.53716872336856	-0.312441117683043	0.754705305860061	0.909924180377033
ENSG00000076662.8	23.7213809011317	1.22650077840143	0.745097434380152	1.64609448618187	0.0997443074700209	0.368537550216208
ENSG00000076685.17	204.084135938338	1.78979623748725	0.681755281908485	2.62527667182417	0.00865785843718371	0.0887716902897626
ENSG00000076706.13	725.867922765517	-1.48995156598722	0.632595297809725	-2.35529978035875	0.0185077679218033	0.144181160801237
ENSG00000076716.8	247.174416101951	-1.85936962028258	0.814206028582949	-2.28365985390534	0.0223915291856324	0.162097636707201
ENSG00000076770.13	3059.53995629505	0.935415652827312	0.879344488718554	1.06376473023726	0.287435292622897	0.619031782320839
ENSG00000076826.8	1583.13092694686	-0.242537845612336	0.45034233249655	-0.538563284219331	0.5901882274667	0.832773399006083
ENSG00000076864.18	1430.99919494165	-0.554444012982799	0.91914596376543	-0.603216501883367	0.546364671237423	0.808920970872604
ENSG00000076924.10	2290.50296530145	-0.0471068377341402	0.512073772068742	-0.0919922876421337	0.926704167179457	0.975556754916214
ENSG00000076928.16	1630.53838725053	0.189541697790709	0.397978947226136	0.476260614064617	0.633888721207791	0.854690518380583
ENSG00000076944.13	1580.35567707584	-0.0620034869107478	0.607459454162498	-0.102070165318658	0.918700981931411	0.973641603933799
ENSG00000076984.16	1373.06911774354	0.035559908453903	0.455561791331793	0.0780572671600639	0.937782499298497	0.978640932738245
ENSG00000077009.12	1.04785705269359	1.44693922204241	3.08309207944624	0.469314306792387	0.638844990433869
ENSG00000077044.8	543.484506958551	-0.0617536141661071	0.53673361621354	-0.115054493142718	0.908401929500474	0.971399956735726
ENSG00000077063.9	114.678017099244	-0.742776716530369	1.0431577785114	-0.712046376714289	0.476436058207258	0.767839358429739
ENSG00000077080.8	4.38054167454742	-1.22448284589547	1.47134518395475	-0.832219970710238	0.405284793387174	0.717732301571529
ENSG00000077092.17	115.45227336721	1.1141245100899	0.638414550637317	1.74514272736686	0.0809600276557851	0.332613275801521
ENSG00000077097.12	2044.55746082202	0.337402609272777	0.45725401882733	0.737888778185213	0.460582038736908	0.757861230599244
ENSG00000077147.13	5383.69717111435	0.0392156986246354	0.390465778080324	0.100433125836109	0.920000472095292	0.973657690630872
ENSG00000077150.16	2739.81607045339	-1.63883275844824	0.466908526732627	-3.50996536712791	0.000448165062577804	0.0110117657957962
ENSG00000077152.8	130.065799471633	-2.46540276505868	0.630240086889023	-3.91184695538544	9.15929512000077e-05	0.00332207211671737
ENSG00000077157.19	508.69114744331	0.792544656962424	0.426391148036699	1.85872680662266	0.0630658717714816	0.291122798713631
ENSG00000077232.15	1247.35045788997	-0.591448128469705	0.427065706771213	-1.38491131245655	0.166079587515296	0.479284747370558
ENSG00000077235.16	1970.8663472052	-0.239339833150403	0.393464360495182	-0.6082884682343	0.542996167957745	0.807239191007599
ENSG00000077238.12	2404.91698873888	0.247715923358529	0.590340579437543	0.419615272923546	0.674766529278156	0.873388296099444
ENSG00000077254.13	927.21520366058	0.118021113010247	0.564886984408296	0.208928717190875	0.834503885762468	0.940735545334226
ENSG00000077264.13	21.0359073466198	-2.1482666423498	1.31107049604635	-1.63855921464795	0.101305092296621	0.370488324659809
ENSG00000077274.8	277.725453518249	-4.01257182779227	2.04838925639309	-1.95889126798966
ENSG00000077279.15	6.66434647345145	-3.10745468180916	1.78190710849803	-1.74389263446423	0.0811778132270208	0.332936452887229
ENSG00000077312.7	1908.03866770894	-0.758208733334148	0.462503417083469	-1.6393581221851	0.101138697850748	0.370419815922643
ENSG00000077327.14	0.550153937655656	-2.3942589528279	3.97552787634434	-0.60224931815332	0.547008191567549
ENSG00000077348.7	1072.75557509494	-0.817180795238421	0.520879557453486	-1.56884789112	0.116683386208612	0.39907392231817
ENSG00000077380.14	895.47052207648	0.0387078350327147	0.470933834114755	0.082193786533678	0.934492614356362	0.977740230775636
ENSG00000077420.14	730.315662274705	0.126304852133759	0.805439235456405	0.156814873889509	0.875390750215723	0.95623973860925
ENSG00000077454.14	153.047829387024	1.29264320415484	0.659863073744081	1.95895672237022	0.050117855292275	0.256089728785021
ENSG00000077458.11	260.932937794936	1.43971279991609	0.543136544954864	2.65073822280867	0.00803160649943476	0.0848362875422281
ENSG00000077463.13	703.681308194147	-0.838518434801429	0.535086817130495	-1.56706988091791	0.117098358379286	0.39977434829221
ENSG00000077498.8	0
ENSG00000077514.7	238.241230763964	-0.0493814671088918	0.437797305980819	-0.112795274055559	0.910192865189923	0.971780148770266
ENSG00000077522.11	92.6222334386087	-2.71249913974705	1.17390394952763	-2.31066531536805	0.0208513484726994	0.155507797540673
ENSG00000077549.16	4491.47083721929	0.209324489539886	0.444003426964115	0.471447914200003	0.637320906590851	0.856376173649009
ENSG00000077585.12	500.831463532683	0.728915803183173	0.41037450417651	1.77622097806947	0.0756965018871824	0.321328762462201
ENSG00000077616.9	20.3156211677438	1.29340172048091	0.797362854134418	1.62209929115016	0.104782089936984	0.37719466123657
ENSG00000077684.14	901.983498403095	0.0691798627796096	0.435858968188473	0.158720751042789	0.873888888460008	0.956121700657001
ENSG00000077713.17	550.078068250792	-0.481836059779183	0.471725549176077	-1.02143303584206	0.307049320274481	0.637766033311101
ENSG00000077721.14	1269.80406730621	-0.7025561822101	0.390418393672972	-1.79949560163035	0.0719403190510517	0.312449389222176
ENSG00000077782.18	590.383376399647	-0.857391001396837	0.96946722878077	-0.884394001100086	0.376483560165641	0.696468309126018
ENSG00000077800.10	7.22151826470799	-2.2978950342721	2.18808663117342	-1.05018466889485	0.29363321682157	0.625925159379129
ENSG00000077935.15	5.83800088541977	-1.76522622667582	1.32437478438984	-1.33287514039245	0.182572781882594	0.501468423309883
ENSG00000077942.16	1174.78995259251	-1.23399689226388	1.14242843034786	-1.08015247124771	0.280074289254193	0.612102491513128
ENSG00000077943.7	41.1663484024149	0.0784156135061921	0.803457987885642	0.0975976525076917	0.922251788635594	0.973842788086613
ENSG00000077984.5	199.122165417674	1.48425131668769	0.506566717565379	2.93002138755026	0.00338938674639243	0.0473510205085191
ENSG00000078018.18	745.517857309834	-3.20272321070189	0.793990459509792	-4.03370490456427	5.49042606723855e-05	0.00221825482224967
ENSG00000078043.14	555.274798487454	-0.211150985059441	0.461699170043768	-0.457334556264038	0.647430595362471	0.861272246822169
ENSG00000078053.15	8.92895361105447	1.76125483825896	1.16734903384967	1.50876454872345	0.131358963368529	0.424860475438819
ENSG00000078061.11	4076.58602621117	0.427285321274283	0.427059306197074	1.00052923580854	0.317054456492555	0.64725174880949
ENSG00000078070.10	2335.89935682627	1.34584552792051	0.479999402925261	2.80384833755734	0.00504966520637396	0.0614873812313556
ENSG00000078081.6	38.2780029409867	-0.399609247658959	0.666157288822066	-0.599872213911476	0.548591401701998	0.810462121407905
ENSG00000078098.12	22.3849322568688	-1.68759477439254	1.21384666814501	-1.39028661418293	0.164441860969453	0.477266396301042
ENSG00000078114.17	70.9621775316977	1.81491419994302	0.773953856372525	2.34499018901387	0.0190275802783664	0.146356735502117
ENSG00000078124.10	429.485558118904	-0.625337564170052	0.611579731963918	-1.02249556596971	0.306546410193278	0.637232302657267
ENSG00000078140.12	2309.58876538631	0.280118262340376	0.424908597008395	0.65924357453008	0.509739369594141	0.786859150673389
ENSG00000078142.10	657.16310407107	0.537195980710531	0.441853033838178	1.21577977193944	0.22406882642149	0.552682726016445
ENSG00000078177.12	351.589496590342	1.61926888217688	0.576376936489056	2.80939222176463	0.00496351353085411	0.0607722288743853
ENSG00000078237.5	128.552725003917	-0.886594163482195	0.645894416942899	-1.37266113504829	0.16985771674805	0.48419826863299
ENSG00000078246.14	328.970740969768	-0.561320072581722	0.576980366934196	-0.972858185044171	0.330623789657169	0.6580930037066
ENSG00000078269.12	337.249778013806	0.453186152600613	0.537068314927066	0.843814725249907	0.398772945674191	0.713136979009829
ENSG00000078295.14	1.29256927006348	-1.11679363895488	2.47084960351284	-0.451987703892263	0.651277840628334
ENSG00000078304.18	2943.71541919768	0.345808850990434	0.639020179406678	0.541154821294553	0.588400874535995	0.83178214523301
ENSG00000078319.8	298.584079159345	-0.361582750761256	0.511605041725795	-0.706761507942788	0.479714698793986	0.768701043164313
ENSG00000078328.18	1.09885777817907	1.25610655577801	3.53969872278619	0.354862561520291	0.722692557036957
ENSG00000078369.16	4863.55854676527	0.771589858696751	0.567447283185799	1.35975601885842	0.173907144434097	0.489311549614247
ENSG00000078399.14	1.15224431738545	-2.28181141037936	2.45671313300442	-0.928806615524065	0.35298931540257
ENSG00000078401.6	98.1792827831236	0.825987730567721	0.689659712914905	1.19767432416288	0.231043828801558	0.560269018629552
ENSG00000078403.15	595.19692465144	0.890017233085992	0.551975770454235	1.61242083570729	0.106870393874237	0.380871927082528
ENSG00000078487.16	291.305612209691	0.222423043895603	0.640091060161363	0.347486565176416	0.728225809899271	0.897740454397272
ENSG00000078549.13	11.5874745309673	1.8563409531452	1.37810482719574	1.34702449081657	0.177972345129437	0.494827014979293
ENSG00000078579.8	2.09618615884688	-0.369981026943804	2.19756727952537	-0.168359362824019	0.866300575487163
ENSG00000078589.11	11.826293431031	2.34872833125201	0.994559207946114	2.36157718161639	0.018197383541726	0.142633827066939
ENSG00000078596.9	171.522825900705	0.760622802172462	0.672501595244957	1.13103494110732	0.258040385184537	0.589147250126176
ENSG00000078618.18	5448.58722716389	-0.616481752167885	0.455396963424406	-1.35372389734922	0.175824481042046	0.491646854064728
ENSG00000078668.12	3250.1736267965	-0.75236512173094	0.514579034338586	-1.46209828136117	0.143714279648999	0.445686822650757
ENSG00000078674.16	2663.44050126344	-0.105193373610143	0.659667335562197	-0.159464275308542	0.873303102296911	0.955949835402732
ENSG00000078687.15	501.355732144512	0.213937720774196	0.439851386998508	0.486386372984023	0.626693250372413	0.85060782984828
ENSG00000078699.20	404.699299035845	-0.267058076803805	0.501512382924242	-0.532505449310404	0.594375968636677	0.835422455010452
ENSG00000078725.11	16.8818717872745	1.9334479133992	0.95322830674879	2.0283156718181	0.0425280404937236	0.234692471229697
ENSG00000078747.11	2062.22744467771	1.38773000532991	0.517089004287885	2.68373528313764	0.00728047269579649	0.0788602773879185
ENSG00000078795.15	2.02811595098188	-1.33017708773017	1.70816287511976	-0.778717947278249	0.436145881534307
ENSG00000078804.11	2059.4143393435	0.210601862557744	0.543140212455671	0.387748610263198	0.698202078844636	0.884390752971955
ENSG00000078808.15	5914.28847738989	0.493485987632138	0.409497231072277	1.20510213546483	0.228163875536249	0.556707539769957
ENSG00000078814.14	49.2249178169532	0.0752323161233588	0.531273513725069	0.141607503818252	0.887390039478486	0.962736988525115
ENSG00000078898.6	43.9033226811415	-0.887087415856592	1.27646015740989	-0.694958954031603	0.487081025009744	0.772553886108911
ENSG00000078900.13	22.8464179618981	-0.986440847858288	0.914501576982982	-1.07866500472601	0.280737091505036	0.612640508679669
ENSG00000078902.14	6790.60280284122	0.203562518164736	0.394554513512003	0.515930020297546	0.605903286072233	0.840140454695671
ENSG00000078967.11	929.82906420511	0.207880643758815	0.422726126260979	0.491761996348612	0.622887605358712	0.848773363011093
ENSG00000079101.15	11.3956002775634	-3.58442204933238	1.64646925586079	-2.17703551801725	0.0294779174776471	0.190280202874144
ENSG00000079102.15	47.7337650180753	-0.0601526031629827	0.867451647810863	-0.0693440416129087	0.944715769948695	0.981323612885652
ENSG00000079112.8	2.26509658687827	-2.46798238213887	2.2400970616809	-1.10173010998326	0.27057902266271
ENSG00000079134.10	495.688950392043	-0.0317363709921052	0.451742195357055	-0.0702532801192524	0.943992067641787	0.981259673225192
ENSG00000079150.16	278.332690292398	0.676215765043089	0.503506241532671	1.34301366947248	0.179267547651985	0.496290935634154
ENSG00000079156.15	239.589241838838	0.277972252623999	0.636864865552683	0.436469756237486	0.662495937638311	0.86778731704412
ENSG00000079215.12	216.93293981584	-2.97808164115082	0.731920309893837	-4.06886050420269	4.72436201686613e-05	0.00199025223357343
ENSG00000079246.14	6385.63460548061	0.156609923613809	0.406216897116789	0.385532765193623	0.699842735915631	0.885197224883433
ENSG00000079257.6	83.4347389964222	0.811038458152806	0.806164513012165	1.00604584431834	0.314393517719449	0.644897585368362
ENSG00000079263.17	44.0973314768445	0.553319671521253	0.707847154777808	0.781693714224137	0.434394596652809	0.739186287763086
ENSG00000079277.18	648.605336754174	-0.225932803427126	0.424786800150156	-0.531873408842417	0.594813675430158	0.835490940387426
ENSG00000079308.15	2697.46251703759	0.498494823255444	0.452914146221841	1.10063866941192	0.271053948592966	0.603455514148765
ENSG00000079313.10	603.233214931497	0.589675390579756	0.545001066770066	1.08197107589982	0.279265380434875	0.611273375092317
ENSG00000079332.13	4126.76901138036	-0.399611248431151	0.421223824725912	-0.948690992707204	0.342777796477463	0.668052256989717
ENSG00000079335.16	73.7984395614904	-0.328153583020747	0.677877186275236	-0.484090023480312	0.628321981259382	0.852044893332365
ENSG00000079337.14	163.710960987983	0.125802430698585	0.599448914445047	0.209863472377875	0.833774232153542	0.94051201638776
ENSG00000079385.20	3239.01134853323	-0.331884085695722	0.435959947113273	-0.761271965219068	0.446494641845194	0.747858504930973
ENSG00000079387.12	194.011038727961	0.0185147365122937	0.475507590379453	0.0389367843687186	0.968940789109201	0.9894441086875
ENSG00000079393.19	41.5557853062889	-7.66165770142211	3.55469262104806	-2.15536433616113
ENSG00000079432.6	1291.02145425135	0.0465060158141078	0.447959626895687	0.103817426888199	0.917314236543884	0.973407237446372
ENSG00000079435.8	61.7497940290496	-0.505924755826713	0.664858761507939	-0.760950723848845	0.446686499972553	0.747868243299253
ENSG00000079459.11	5054.43239706828	-0.933175830534156	0.613830403624966	-1.52025025971881	0.128448090006635	0.419826719009333
ENSG00000079462.6	573.817806717448	-1.2037191210398	0.678372852982408	-1.77442112511984	0.0759935181117757	0.322274309803183
ENSG00000079482.12	24.4151626357065	0.26596677071214	0.715475891992229	0.37173407754042	0.710090850107866	0.889550844964504
ENSG00000079557.4	11448.2703101061	2.08095829323867	0.693699113659856	2.99979955612144	0.0027015732713102	0.0404788216121175
ENSG00000079616.11	2244.9188778273	-0.592392719123566	0.617445712718329	-0.959424783298816	0.337344794920064	0.6635236564731
ENSG00000079689.12	290.262350887548	-1.62894052477	0.813897773083603	-2.0014067842924	0.0453485701596197	0.242993968432479
ENSG00000079691.16	192.549300108894	-0.0275030289415425	0.770167007945742	-0.0357104740371845	0.97151321880619	0.990342945914449
ENSG00000079739.14	11325.3924983121	1.25883279834393	0.514683696576948	2.44583771880896	0.0144516031547486	0.124208515717003
ENSG00000079785.13	3251.79321171753	-0.446609056886046	0.394357987072137	-1.13249654254968	0.257425737140995	0.588687447921198
ENSG00000079805.15	2770.9258008038	-0.194828262972232	0.541065368135269	-0.360082671052649	0.718785311317371	0.893093419196881
ENSG00000079819.15	651.743456170177	0.487126626384552	0.580026699649486	0.839834832911874	0.40100100008677	0.714750417573598
ENSG00000079841.17	1.37572380267956	-0.0949802511540383	2.8376215742786	-0.0334717821484652	0.973298367801921
ENSG00000079931.13	120.982352975061	-0.932104496829017	1.0007476576087	-0.93140812245946	0.351642490877456	0.676470604901338
ENSG00000079950.12	759.156133761868	0.616369891838681	0.429441298533819	1.43528322483903	0.151206406037071	0.457857859928404
ENSG00000079974.16	179.47380247563	0.448338553208348	0.467856088821722	0.958283036002528	0.337920055612942	0.663845651091475
ENSG00000079999.12	3899.45270451637	-0.531813707569303	0.545923697489128	-0.974153915675907	0.329980122575775	0.657354580791848
ENSG00000080007.7	8.37269468792972	3.00323439540808	1.62181974182617	1.85176830566042	0.0640591006981132	0.293583913972595
ENSG00000080031.8	1423.81244093399	0.246512878480955	0.815217930366084	0.302388930982241	0.7623555918343	0.913341760595578
ENSG00000080166.14	5.32277499726541	2.09551322967298	1.22936726442037	1.70454614363023	0.0882791030996792	0.344779406955344
ENSG00000080189.13	2736.70452452907	-0.246024027589615	0.430381900399194	-0.571641203687745	0.567565074948266	0.821638210854579
ENSG00000080200.8	50.942340580959	2.39468216296566	0.842313363107747	2.8429825144058	0.00446935223425551	0.0565076142624753
ENSG00000080224.16	2.5646239642208	5.01376463117712	2.60962552442704	1.92125827412649	0.054699154746981
ENSG00000080293.8	36.7397341547604	0.889994982440021	0.768308385078988	1.15838249292115	0.24670798035225	0.577221647980418
ENSG00000080298.14	74.9613080202065	0.214542031410483	0.599223573926845	0.358033363081064	0.72031834615757	0.893642731571363
ENSG00000080345.16	775.853642575633	-0.122287791047545	0.447049670296262	-0.273544080608547	0.784435012454855	0.923197227095244
ENSG00000080371.5	1557.2151052142	0.142384988121415	0.427766888600385	0.332856497115253	0.739242608935747	0.902858691069594
ENSG00000080493.12	1181.27881158007	2.11021883872314	0.495380965320485	4.25978991210924	2.04619139433476e-05	0.00102764278915479
ENSG00000080503.18	2160.53519434483	1.31563078415421	0.578457188092608	2.27437883258456	0.0229432190187827	0.164499695912594
ENSG00000080511.3	22.9843445825933	-5.28558695642577	1.83392058341799	-2.88212423385024
ENSG00000080546.12	774.910016685351	0.977048093068133	0.571090463998971	1.71084645018673	0.0871094621894683	0.342750615100236
ENSG00000080561.12	161.939652022049	-0.469250583327382	0.576521167129865	-0.813934700201008	0.415682360520887	0.725780598357416
ENSG00000080572.11	0
ENSG00000080573.6	2005.62426170833	-1.79401456827014	0.819894841005076	-2.18810325244995	0.0286620820586653	0.187079582534538
ENSG00000080603.15	1830.09359502414	-0.116394548566083	0.407618139408771	-0.285548010044174	0.775224327981085	0.918945661370645
ENSG00000080608.9	530.522912144433	-0.48029393439232	0.547084559041491	-0.877915354134304	0.379989656139878	0.698192376322053
ENSG00000080618.12	27092.7605287288	1.39446012820109	0.67252578209813	2.07346716708864	0.038128823653215	0.221365522606409
ENSG00000080644.14	157.482189634155	-8.29216997058265	3.83190832280114	-2.16397921663247
ENSG00000080709.13	439.242794465606	5.54947178152455	0.729421651761072	7.60804367148444	2.78275820436031e-14	1.63174924329192e-11
ENSG00000080802.17	450.998468956506	0.278171511165201	0.475544403698241	0.584953810836382	0.558578774715829	0.816969468534085
ENSG00000080815.17	1672.06762838205	0.0250830046117213	0.509385629247925	0.0492416809024524	0.960726694980417	0.986441147496426
ENSG00000080819.5	941.772386725612	1.19119843612687	0.470557650614439	2.53146120262085	0.0113588382873102	0.106224722190294
ENSG00000080822.15	898.936596024635	0.617501281323951	0.429907910665587	1.43635710347346	0.150900752816924	0.457247107964274
ENSG00000080823.20	97.2706981592074	0.450495128443844	0.568082844725464	0.79300956300054	0.427772251183203	0.734310211383083
ENSG00000080824.17	25066.6682492416	-1.08256998577603	0.474128858285694	-2.2832822066353	0.0224137504416995	0.162204379447335
ENSG00000080839.10	106.839810797404	-0.0983777832285	0.471776335825718	-0.20852632011802	0.834818033820422	0.940796387999578
ENSG00000080845.16	1915.19271397715	-1.09671880850159	0.42179130752321	-2.60014559081742	0.00931842168474584	0.0933390936621634
ENSG00000080854.13	7.31692505615509	-3.00401213720555	1.6542096505254	-1.81598029986794	0.0693733941457771	0.307231100099363
ENSG00000080910.10	528.676149140684	1.13199230623598	0.799743460870512	1.41544427884889	0.156938274877844	0.466148094487105
ENSG00000080947.13	15.0167048765288	0.340996710305214	0.845588810351877	0.403265400547713	0.686752992052345	0.87959327458735
ENSG00000080986.11	102.105073092249	-2.39542183696773	0.632002341878876	-3.79021038094004	0.000150519744104325	0.00474662262803406
ENSG00000081014.9	207.49073651782	0.0336612080272089	0.550175332542104	0.0611826922004592	0.951213713530454	0.982967537519751
ENSG00000081019.12	269.995237256968	0.815712354286226	0.596200434931287	1.36818476890282	0.171254247931463	0.486262552430444
ENSG00000081026.17	377.799176933611	1.1998835066762	0.604312987877071	1.98553321001977	0.0470851790283508	0.247710970950315
ENSG00000081041.8	3820.3324880973	1.08285281666579	0.827352665623897	1.30881649586422	0.190596517805811	0.511210539042512
ENSG00000081051.6	249.84901826676	0.12656746463955	0.70854866383023	0.178629176936641	0.858228883065329	0.950375630861508
ENSG00000081052.11	118.897552977453	0.516198638908807	0.869144877290286	0.593915528235233	0.552568612546614	0.81264151161348
ENSG00000081059.18	901.294177159944	-1.359108431374	0.828907958305797	-1.63963732976081	0.101080596566933	0.370419815922643
ENSG00000081087.13	646.724346947127	0.116944939215835	0.401478350024236	0.291285792144894	0.7708327527849	0.916935544954284
ENSG00000081138.12	0.130813829777563	-0.552743515465693	4.0804728567969	-0.135460652444968	0.892247672257474
ENSG00000081148.11	6.14401395926348	0.110484464092889	1.28711359705855	0.0858389378726009	0.931594452749613	0.976834065216655
ENSG00000081154.10	1913.09802464394	0.269850060816239	0.431012563342194	0.626083979371144	0.531259859737118	0.799820547974222
ENSG00000081177.17	329.118340337145	1.08441116081133	0.552328302928575	1.96334526958247	0.0496060686433279	0.254842987277189
ENSG00000081181.6	118.698893177021	-1.60703066586293	1.17911689703628	-1.36291038649536	0.172910754900027	0.488282147378757
ENSG00000081189.12	328.266273360001	-0.254077638265155	0.536331005628523	-0.47373289181259	0.635690394941889	0.855272119442079
ENSG00000081237.17	450.455200129448	1.94453503439805	0.629442893727876	3.0892953972068	0.00200631845519937	0.0333812003098203
ENSG00000081248.9	5.02219008658169	-2.80115515306328	1.50654497955619	-1.85932394390804	0.0629812350648858	0.290818751119364
ENSG00000081277.10	43.2490970045444	5.10841416715211	1.49273428291508	3.42218586765231	0.00062119832742171	0.0140390821997306
ENSG00000081307.11	1309.54886387242	-0.0212348949319486	0.389237648641928	-0.054555089945791	0.956492918470812	0.984937744279603
ENSG00000081320.9	221.807308639319	0.640153973080389	0.567471564485427	1.12808114651678	0.259285650617227	0.59046516141994
ENSG00000081377.15	1553.18921320925	1.7774299998345	0.521732849295866	3.40678184675036	0.000657336433218441	0.0145377892508739
ENSG00000081386.11	125.587733792164	0.905202490976306	0.605949059739029	1.49385905700747	0.13521246175307	0.432297313615473
ENSG00000081479.11	39.4692355249641	-1.52850191450329	1.06920314295999	-1.42957110121448	0.152840154681821	0.460352198826103
ENSG00000081665.12	145.119041489758	-0.212559069838699	0.566509031610738	-0.375208616241009	0.707505322700531	0.888363648435136
ENSG00000081692.11	808.035954029612	-1.06587037416459	0.50294029717008	-2.11927813333307	0.0340669685094098	0.207166578079871
ENSG00000081721.10	382.174170021955	-1.36271440407693	0.552668745792358	-2.46569833096535	0.013674644769389	0.119969710035044
ENSG00000081760.15	668.537097854477	-2.01641490654293	0.41194477507528	-4.89486705147418	9.83722090067805e-07	9.04357392631826e-05
ENSG00000081791.7	2812.48911891722	0.115140019532909	0.424333094213873	0.271343482521011	0.786126866227881	0.923367951957417
ENSG00000081800.7	0.459071456287911	-0.507445744565855	3.90238591862446	-0.130034741603599	0.896538940209193
ENSG00000081803.14	681.122204710924	0.135194971046524	0.515778980044185	0.262118031709904	0.793230445374588	0.925165452254976
ENSG00000081818.3	13.5646363616763	-0.2401485059863	0.828596929764473	-0.289825483730144	0.771949751012153	0.917409169476318
ENSG00000081842.16	0.870144314897151	-0.145923354074492	2.79089882990207	-0.0522854331052953	0.958301260138551
ENSG00000081853.14	48.7706745109781	-0.873758643673913	1.13564029095366	-0.76939736167706	0.441657454348666	0.744017402713617
ENSG00000081870.10	864.780205356576	-0.472769124212453	0.506714147975311	-0.933009520459428	0.350815052805723	0.675957671907013
ENSG00000081913.12	1480.80359851837	0.730890546706777	0.551915881234167	1.32427888299281	0.185410441084335	0.504996969704041
ENSG00000081923.9	729.126433653911	-0.179850033343501	0.489005389756075	-0.367787425478508	0.713031745883872	0.890676467026871
ENSG00000081985.9	13.7848630148601	0.277895908865628	1.03223806678606	0.269216877198565	0.787762793443402	0.924003977215118
ENSG00000082014.15	177.072584689119	-0.0775857508778506	0.697665938252058	-0.111207594672366	0.911451729314164	0.97211959095468
ENSG00000082068.7	769.81703623976	-0.431338520423738	0.404286983654867	-1.06691171831533	0.28601170274172	0.617997201741297
ENSG00000082074.14	260.640580008922	1.16829928181415	0.545922630425388	2.14004552422347	0.0323510878785082	0.201056775311405
ENSG00000082126.16	1.93648855289547	-1.46707853472527	1.85980507833206	-0.788834567567152	0.430208702940816
ENSG00000082146.11	2035.75198002631	0.390161381833161	0.532780394438958	0.732311822855304	0.463978264731324	0.759744687672437
ENSG00000082153.16	3057.12103924202	0.741079516931624	0.406290107231298	1.82401565714159	0.0681497052149308	0.304171159091368
ENSG00000082175.13	31.3854674573998	-0.0969102243807665	0.901154250990997	-0.107540106784376	0.914360509178111	0.973126246777783
ENSG00000082196.19	529.539711955672	-3.48404334000538	1.07158952101245	-3.25128537717839	0.00114884478216587	0.0220034637920024
ENSG00000082212.10	502.830145964196	-0.282331040253282	0.430946080957749	-0.655142377964826	0.512376089596915	0.788684756289086
ENSG00000082213.16	469.956802154368	-0.266253506198449	0.486013755565139	-0.547831214959848	0.583807802961406	0.83099542882001
ENSG00000082258.11	603.330295384351	0.60529052953987	0.521349008251382	1.16100830721829	0.245638521160598	0.576390713197675
ENSG00000082269.15	139.757410616759	0.555073158907081	0.644960519586583	0.860631220129383	0.389441185381005	0.706405480982049
ENSG00000082293.11	1.39283367745663	3.00822107549734	2.41188465997548	1.24724914313602	0.212306158706293
ENSG00000082397.14	156.557873527258	0.665370954488886	0.468766190790191	1.41940900935556	0.155779807335775	0.464449457187985
ENSG00000082438.14	3198.10022888127	1.58210531655292	0.606586545680106	2.60821036638565	0.00910169999251808	0.0919399089457848
ENSG00000082458.10	205.601603828501	-0.368836367087637	0.736087424751398	-0.5010768485988	0.616317039582191	0.844511780498841
ENSG00000082482.12	5.22277634317695	1.39731561324908	2.11346784186133	0.661148272792486	0.50851723030739	0.786160834039495
ENSG00000082497.10	45.0512034354955	-2.46810854585134	1.35015778741411	-1.8280148948949	0.0675473162431837	0.302104014267597
ENSG00000082512.13	107.790516672066	-0.993149512175089	0.513603494889173	-1.9336891630564	0.0531513570515666	0.264246526716496
ENSG00000082515.15	1333.83773689831	-0.731478082699544	0.411887787877807	-1.77591592717128	0.0757467753682884	0.3214792719856
ENSG00000082516.8	459.884321081035	-0.265081243434175	0.48146185850731	-0.550575790688829	0.581924508368711	0.829856325329798
ENSG00000082556.9	0.883624425667321	2.27170766043893	2.73156279982838	0.831651265927934	0.405605816033567
ENSG00000082641.14	9215.55480047671	0.35412029789554	0.43889276923588	0.806849241358134	0.419753345540682	0.728732382559866
ENSG00000082684.13	82.398698308949	-2.42859809055129	0.51450479908101	-4.72026324125483	2.35539621321264e-06	0.000178058105372339
ENSG00000082701.13	1186.51492035384	-0.0813360824622077	0.420497200682835	-0.193428356550598	0.846623509441793	0.946058610923225
ENSG00000082781.10	6347.29033635211	-0.630100634341092	0.539869568802962	-1.16713493545894	0.243155881460841	0.574317337207481
ENSG00000082805.18	775.997163384437	0.661367349555596	0.514810471243546	1.28468123027497	0.19890369991659	0.521683189445624
ENSG00000082898.15	2361.39336061936	0.0546542982770879	0.436139260461095	0.125313869288691	0.900275072631754	0.968253712527188
ENSG00000082929.7	11.0502543766714	-1.2088987853994	1.48296114964728	-0.815192485445044	0.414962138582498	0.725289499612171
ENSG00000082996.18	1755.14152550475	0.36168645621626	0.449744132433291	0.804204947064892	0.421278622211612	0.729791857758298
ENSG00000083067.21	22.3430152769222	0.963559948981876	1.07419806052074	0.897003992461847	0.369716786623512	0.691341491086645
ENSG00000083093.8	241.827832947506	-0.14172857473418	0.514262483445478	-0.27559578871984	0.782858544564837	0.922547413739983
ENSG00000083097.13	232.468980118756	1.84483888659606	0.633580856051085	2.91176551339379	0.00359392318340847	0.0491099339221494
ENSG00000083099.9	766.11602125697	0.176638141601484	0.489648328952916	0.360744908451366	0.718290149961197	0.892811406104734
ENSG00000083123.13	2143.66890004738	1.83517396061437	0.737187773462516	2.48942539021597	0.0127949770882222	0.114722162374353
ENSG00000083168.8	654.205507217397	0.505728263959544	0.525264430945097	0.962806986663075	0.335644393897522	0.662105260584867
ENSG00000083223.16	1614.7747987135	1.1611138535499	0.607054340538863	1.9127016743167	0.055786254734966	0.271721365259941
ENSG00000083290.18	282.276481142642	-0.412602722267217	0.710935879828843	-0.580365591291511	0.561668103837051	0.818675425010689
ENSG00000083307.9	22.4948276077021	4.44500767015467	1.09768746411626	4.04942920044489	5.13427072617475e-05	0.00209839682750819
ENSG00000083312.16	1705.49515639229	-0.21596206546219	0.454520548177385	-0.475142578983925	0.634685351449805	0.855032962125335
ENSG00000083444.15	8360.97421253377	-0.241274642617935	0.456547555324638	-0.528476474803093	0.597168670982565	0.836455769523675
ENSG00000083454.20	39.4628979201578	-1.89199962582563	1.00981232106131	-1.87361511279358	0.0609834935118555	0.286075216266641
ENSG00000083457.10	274.230481275397	-0.00728727265675592	0.593644945517957	-0.0122754732635646	0.990205835383017	0.996518899686139
ENSG00000083520.13	853.808437246081	0.835407425693268	0.572033937003008	1.4604158453782	0.144175820556662	0.446479960433533
ENSG00000083535.14	221.346341102408	0.510923733798159	0.649529892557508	0.786605419785084	0.431512885595735	0.736918229997567
ENSG00000083544.12	386.011958023439	0.469863627188438	0.634010695902409	0.741097319375132	0.458634434843788	0.756714657816782
ENSG00000083622.8	0
ENSG00000083635.7	177.810047269146	-0.167242809999065	0.604472668090601	-0.276675553466047	0.782029244858905	0.922264852772669
ENSG00000083642.17	519.782973976114	0.359754312441722	0.554780287237775	0.64846268102445	0.516685740602578	0.79127647547918
ENSG00000083720.11	62.2972591980059	-0.589615087700885	0.859898611849998	-0.68567977616847	0.492915062554886	0.775773941766856
ENSG00000083750.11	181.605568569075	0.037011425841134	0.529299204390282	0.0699253381341633	0.94425308557257	0.981323612885652
ENSG00000083782.6	0.160797295611202	-0.552743515465692	4.0804728567969	-0.135460652444968	0.892247672257474
ENSG00000083799.16	1108.1971348301	0.178913953072071	0.554571795914131	0.322616394108462	0.746985776403353	0.906308209643617
ENSG00000083807.8	52787.7047868315	0.858860895337346	0.814156872058197	1.05490836571352	0.29146723581549	0.623292065495823
ENSG00000083812.10	214.946588908662	-0.6490060898228	0.447786507209714	-1.44936499732192	0.147235678321041	0.451062592043674
ENSG00000083814.11	122.489528353217	-0.938516850736187	0.871115732443292	-1.07737332226092	0.281313517455233	0.613219941194489
ENSG00000083817.8	108.729422049762	-0.988893893059157	0.722751981944976	-1.36823407996471	0.171238817238618	0.486262552430444
ENSG00000083828.14	85.9359501361039	0.448005757841641	0.766618470200658	0.584392074097013	0.558956558003711	0.817175624249389
ENSG00000083838.14	224.87197348173	-0.933791147921199	0.520116292357491	-1.79535069683873	0.0725978424514363	0.314432478014498
ENSG00000083844.9	388.338433493943	0.564399931473112	0.504095364487367	1.11962928293751	0.262871771618998	0.594465831121759
ENSG00000083845.7	26231.7378826694	-0.881791897834616	0.614429728672607	-1.43513872569221	0.151247570156106	0.457857859928404
ENSG00000083857.12	1618.4806614008	-0.657615371836437	0.688338940988243	-0.955365638463375	0.339392824427408	0.664549294017015
ENSG00000083896.11	1264.60736964181	0.550576569446586	0.474548050335632	1.16021247807715	0.24596230784929	0.576471668045608
ENSG00000083937.7	982.526794921031	0.513991644629434	0.499832524974017	1.02832772768469	0.303795692324506	0.634442833332276
ENSG00000084070.10	3175.76367062276	0.154560646140523	0.41946981944897	0.368466666668795	0.712525295607332	0.890543741776409
ENSG00000084072.15	1548.39553025115	-0.281374513196884	0.495735978375814	-0.56758945380312	0.570313769888856	0.823649368910422
ENSG00000084073.7	2436.27838395321	-1.08714400818454	0.578261779845551	-1.88002051333033	0.0601052822733446	0.283721969521143
ENSG00000084090.12	5292.50536257746	-0.343449584864854	0.425239349695552	-0.807661814718571	0.419285291344092	0.728471684719056
ENSG00000084092.6	540.38621439101	-0.394146885564548	0.562702354263035	-0.700453592522742	0.483644077323891	0.770962190663815
ENSG00000084093.14	575.05535972825	0.341868961990574	0.492477994907669	0.694181192917398	0.487568585451921	0.772809012768983
ENSG00000084110.9	3434.40559217782	2.66988010881442	0.844333833992221	3.16211432176129	0.00156628060906714	0.0279687441105521
ENSG00000084112.13	856.5924954628	0.112062342041307	0.531983248272638	0.21065013307313	0.833160289405412	0.940246847279055
ENSG00000084207.14	1480.3907017103	0.908396681878762	0.709979694642288	1.27946853795085	0.200732111961392	0.523679868775611
ENSG00000084234.15	22592.9718768027	0.363411881751768	0.466796846694314	0.778522572132437	0.436261005029956	0.740677577676652
ENSG00000084444.12	113.390223997779	0.928855306493222	0.535767222810371	1.7336919224377	0.0829727605060879	0.33603147522177
ENSG00000084453.15	272.336406696267	1.92048939592125	0.756262175894655	2.53944922427109	0.0111027160256156	0.104645387713684
ENSG00000084463.6	1594.68506796567	0.22623678390163	0.655568380045981	0.345100207373886	0.730019037554438	0.89842478726938
ENSG00000084623.10	5443.62622738153	0.284656515032475	0.542009179308954	0.525187627625429	0.599452764917002	0.837244966878848
ENSG00000084628.8	8.29434705044051	-4.34170909586015	1.63153436895642	-2.66112021816448	0.00778811447386561	0.0831959289143222
ENSG00000084636.16	294.680928539588	-0.759768332070909	0.863813335855082	-0.879551519448147	0.379102311941235	0.697566259000682
ENSG00000084652.14	2422.81575500571	-0.403567647145847	0.41709003826857	-0.967579203812066	0.33325456747937	0.660119702002412
ENSG00000084674.12	210304.633725635	0.938901644217428	0.436320594613057	2.15186185527199	0.0314082363331115	0.197688742524858
ENSG00000084676.14	1054.5175164016	0.54467253188178	0.479497602794975	1.13592336793115	0.255988637471586	0.587038289284291
ENSG00000084693.14	905.818259511702	-1.03198997508085	0.61958564081461	-1.66561312448111	0.0957904953635988	0.360310434710236
ENSG00000084710.12	17.342635253629	-0.633336246606835	0.754885564496248	-0.838983120613089	0.401478781682613	0.715205160307577
ENSG00000084731.12	82.5333670827905	0.270949305853544	0.630180624714618	0.429954992628098	0.66722838109427	0.869537016057631
ENSG00000084733.9	3057.22788164389	-0.756797449265915	0.465487868453469	-1.62581562389647	0.103988883653943	0.375850046450649
ENSG00000084734.7	3108.32489616821	0.886107375556083	0.643937653403714	1.37607634974025	0.168797996752919	0.482954152387093
ENSG00000084754.9	15443.2974054313	0.143308181040625	0.456438662717283	0.313970293812269	0.753543600846582	0.909467890691583
ENSG00000084764.9	869.879817328227	-0.493180351664311	0.541004125682608	-0.911601831209779	0.361978358068982	0.683737272336653
ENSG00000084774.12	797.956064955736	-0.817921990189847	0.621478697084016	-1.31609014762299	0.188143787413503	0.508225235430433
ENSG00000085063.13	11228.2146209416	-0.608638846384258	0.501076671081911	-1.21466210963305	0.224494989574516	0.553230723967366
ENSG00000085117.10	2248.4384893471	1.73664373921675	0.525538949853343	3.3045005316949	0.000951457954298605	0.019274352732458
ENSG00000085185.14	371.434031878521	-0.279086187918805	0.619048833140046	-0.450830650149481	0.652111609020553	0.863575024224135
ENSG00000085224.19	831.622754929517	0.389236796624142	0.475579188054891	0.818447918665475	0.413101469323277	0.724098588045589
ENSG00000085231.12	867.01708100804	-0.804317578726866	0.482133946228219	-1.66824506969302	0.0952670873349159	0.359026355188177
ENSG00000085265.9	200.285482598466	1.74988938987958	0.718886551060606	2.43416626350555	0.014926137181953	0.126400262412042
ENSG00000085274.14	370.762305550123	0.293997750720678	0.423829233646867	0.693670297801203	0.48788899707418	0.772809012768983
ENSG00000085276.16	85.6849488789354	-0.451321485527188	0.708911326660668	-0.636640251825487	0.524359199985238	0.795771387794173
ENSG00000085365.16	825.314517007176	0.366483975277248	0.485232086827542	0.755275640721388	0.450083611396626	0.75061720614147
ENSG00000085377.12	769.545576102246	0.651450954023193	0.528585882095834	1.23244107738973	0.217784364415621	0.544685741593921
ENSG00000085382.10	57.2478937621722	2.00741681055692	0.667651963738583	3.0066815041121	0.00264116327090338	0.0400606786538
ENSG00000085415.14	1071.74724557448	-0.378667541021384	0.484110366971295	-0.782192588418245	0.434101399562713	0.738977164763642
ENSG00000085433.14	102.482428123425	0.38537568379121	0.624865787127044	0.616733531792577	0.537410500108888	0.803670954670694
ENSG00000085449.13	793.352309503535	0.45808972766915	0.427897965617312	1.07055832109013	0.284368072360327	0.616287054033528
ENSG00000085465.12	402.803517548827	2.31246395792921	0.737657769106944	3.13487372434081	0.00171928101673151	0.0299130079703342
ENSG00000085491.14	104.566024855345	0.807767464016885	0.695140876618831	1.16201980229658	0.245227421362251	0.576173593697532
ENSG00000085511.18	528.724941548267	0.511961663008421	0.535621120779977	0.955827996967141	0.339159141174132	0.664424803940103
ENSG00000085514.14	163.405462467575	0.205061907342857	0.58027825322741	0.353385477057494	0.723799472012539	0.895138268517416
ENSG00000085552.15	814.140781654545	-0.0789035605239526	0.66499576422326	-0.118652726481822	0.905550490674626	0.970500414516169
ENSG00000085563.13	2021.19920995644	-0.555463614705831	0.736143160622341	-0.754559227632078	0.450513495400093	0.750646053236936
ENSG00000085644.12	153.720946927128	-0.809053558566974	0.535180835589883	-1.51173865871939	0.130600359841719	0.423716535522274
ENSG00000085662.12	1353.10020810667	-1.5992307585418	0.887449288844579	-1.80205311857755
ENSG00000085719.10	2367.81973653575	0.183235272461243	0.46822910896364	0.391336781403465	0.6955483146647	0.883215277710718
ENSG00000085721.11	956.84166486939	0.340248486644156	0.532147575416853	0.639387460100002	0.522570904642103	0.79453648740588
ENSG00000085733.14	4562.91502840997	-0.76917319833601	0.423810687288903	-1.81489806983485	0.0695395752327501	0.307403578300966
ENSG00000085741.11	110.672432603528	-0.686257244528556	0.786420034156927	-0.872634488850796	0.382862335718337	0.700570739899587
ENSG00000085760.13	1448.35180455451	-0.124215701483504	0.400201695128141	-0.310382746988943	0.75626991264501	0.910293038820867
ENSG00000085788.12	391.565593197139	0.510556216763505	0.539473491476075	0.946397227723927	0.343946018868511	0.669227221398299
ENSG00000085831.14	304.47418206902	-3.54913401524475	0.919276423209506	-3.86079086294144	0.000113020611550876	0.0038615672255241
ENSG00000085832.15	1569.24757667911	0.268324892099281	0.439463429740192	0.610573881558046	0.541481718125854	0.806202810627129
ENSG00000085840.11	69.2007768643166	-2.46880339239507	0.726012581420149	-3.4004967070486	0.000672635460565372	0.0147558128942632
ENSG00000085871.7	6552.94061169544	0.176015597922088	0.48433719001965	0.363415408829017	0.716294592918556	0.891595001562273
ENSG00000085872.13	1551.6131563126	-0.292977386035557	0.568540303950734	-0.515315069133507	0.606332870454354	0.840278926666452
ENSG00000085978.20	742.853178939343	-0.0357647752565395	0.428333500640281	-0.0834974971676921	0.933455967415449	0.977142751570278
ENSG00000085982.12	1502.89588712743	0.121646800538328	0.443880080774693	0.274053299093803	0.78404366220267	0.923135143818806
ENSG00000085998.12	3265.58572640798	-0.706243411721348	0.488920178790347	-1.44449634594483	0.148599406854644	0.453682460519552
ENSG00000085999.10	22.0131620722974	-1.73321359349304	0.844059637950221	-2.05342551114292	0.0400313272025687	0.227587720692797
ENSG00000086015.19	739.696593725781	-0.941356247649093	0.577827541665059	-1.62913011196472	0.103285477903016	0.374025654535246
ENSG00000086061.14	7932.80497001462	0.14447647659249	0.440018007339204	0.328342190962005	0.742652947005407	0.904236957081167
ENSG00000086062.11	6453.72729316807	0.100609871625706	0.600610549025336	0.16751266155577	0.866966685808684	0.954322913328767
ENSG00000086065.12	1876.22900932184	0.335550120876823	0.536186327761434	0.625808797247288	0.531440360923761	0.799896240339833
ENSG00000086102.17	1410.90397610346	0.51857303813249	0.522240847898775	0.992976784981408	0.320721267956539	0.650193293738092
ENSG00000086159.11	154.613175277949	-2.96030861024716	2.07285235947218	-1.42813288014442
ENSG00000086189.8	510.896412705561	-0.490465447155711	0.440644545657769	-1.11306369723372	0.265681073654459	0.597575842215129
ENSG00000086200.15	486.62864414346	-0.370478131145156	0.440840828310104	-0.84038979004129	0.400689871850614	0.714503777403709
ENSG00000086205.15	765.73473271754	2.00994585442815	0.813936767349717	2.4694127787995	0.0135335006235267	0.119020198430497
ENSG00000086232.11	6839.85374094774	-0.170020315718946	0.514814276256346	-0.330255635013289	0.741206812106005	0.903827247513419
ENSG00000086288.10	4.55039714474516	-0.808785417169045	1.2800762095169	-0.631825989074728	0.527500589312527	0.797926011693829
ENSG00000086289.10	784.900773764298	-1.13108679435242	0.598019840776207	-1.89138673540381	0.0585727379555929	0.278990483519936
ENSG00000086300.14	1350.44441900565	0.501075627285736	0.677663642534642	0.739416424070767	0.459654172145521	0.757685527949341
ENSG00000086475.13	1990.10101239626	0.0274092767132929	0.458569469945523	0.0597712637008938	0.95233781288806	0.98335965077847
ENSG00000086504.14	4444.32644103553	-0.588839953085648	0.607909509516836	-0.968630929221119	0.332729365833736	0.65989305237827
ENSG00000086506.2	0.698900179796822	-2.7373798322086	3.96107849557294	-0.691069322475685	0.489521977820412
ENSG00000086544.2	1271.92776817092	-0.943901464549876	0.680994720294035	-1.38606282313367	0.165727721141993	0.479161598866827
ENSG00000086548.8	7.55358812464141	5.59041925692868	1.77769247069406	3.14476173415193	0.00166222148035673	0.0291776353056794
ENSG00000086570.11	13.8207511360102	0.844945743397863	1.52877705084288	0.552693895379976	0.580473034222591	0.828985186314727
ENSG00000086589.10	1531.78955287345	-0.882948773107228	0.396266045235861	-2.22817166326146	0.0258690699185461	0.176218317410605
ENSG00000086598.9	10685.4894675978	-0.0196716745440333	0.481784392767577	-0.0408308671665987	0.967430731430333	0.989206109507435
ENSG00000086619.12	1064.10579271395	0.339629622439683	0.449727023191896	0.75519060435638	0.450134625345423	0.75061720614147
ENSG00000086666.17	2665.6248422097	-0.204364769529829	0.393440244690169	-0.519430262378889	0.603460732491564	0.839104266732307
ENSG00000086696.9	7176.40640696881	0.830168682837039	0.667465400241342	1.24376287150894	0.213586848946661	0.539525005791915
ENSG00000086712.11	437.690443664936	0.196648258678078	0.536191780790577	0.366749856531061	0.713805613783327	0.890676467026871
ENSG00000086717.17	7.01095477420872	-5.06796700257651	2.01525544806876	-2.51480129103891	0.0119099489717272	0.109155705248355
ENSG00000086730.15	357.730640375802	-0.739546146987883	0.722308747933812	-1.02386430886152	0.305899370230282	0.636445219468993
ENSG00000086758.14	4353.03488606465	0.10107559720452	0.462759312113944	0.218419369548273	0.827102375128484	0.937675835813503
ENSG00000086827.7	444.882609953192	-0.115633507701858	0.443426974250961	-0.260772380609426	0.794268044763055	0.925825210452494
ENSG00000086848.13	276.737392390201	0.268495716135642	0.522953046750916	0.513422223665764	0.607656003205022	0.840757893650363
ENSG00000086967.9	4.09304501612663	-1.23243433392096	1.59140310750944	-0.774432529448636	0.438675053215331	0.742046932368612
ENSG00000086991.11	28.7781993879623	-2.29303186943425	0.950320019718366	-2.412904939237	0.0158259465887054	0.131311642193206
ENSG00000087008.14	1021.98871885525	0.677989119523529	0.603699895772462	1.12305654559706	0.261413479904988	0.592723488248633
ENSG00000087053.17	270.904172157554	-0.450355665213289	0.519305251937738	-0.867227249354459	0.385817508723454	0.702829275337032
ENSG00000087074.7	1953.4596176374	0.677908911345434	0.602471430835157	1.1252133738619	0.26049862724933	0.591871213404698
ENSG00000087076.7	2463.70780452731	-2.38359361167479	1.09248385257942	-2.18181129729925	0.0291234624572549	0.188954139196352
ENSG00000087077.10	3094.06468558736	-0.552723480688446	0.655078021499237	-0.843752137223992	0.398807926405938	0.71314075424901
ENSG00000087085.12	344.195817031156	-3.49834629874843	1.02198484275924	-3.42309019897331	0.000619135290238695	0.0140070482346389
ENSG00000087086.12	726545.828840049	-0.874238138039696	0.739944418249061	-1.1814916316396	0.237407475889159	0.56801859251116
ENSG00000087087.17	2389.4372197896	-0.220619383037533	0.438441771010597	-0.503189699578602	0.614830906043913	0.843762444168605
ENSG00000087088.18	2560.12382690484	-1.12087199464633	0.510185313755315	-2.1969899258682	0.0280211656971175	0.184450003326657
ENSG00000087095.11	612.232345089923	-0.0174748719763917	0.443464484851316	-0.0394053471548025	0.96856721680931	0.989424522013674
ENSG00000087111.19	539.463497176668	0.0323172482803203	0.435262678853729	0.0742476896145294	0.940813299715703	0.979974331491281
ENSG00000087116.12	483.555095594085	1.55514540691783	0.785508305037917	1.97979499000047	0.0477265695707062	0.249873468486014
ENSG00000087128.8	2.54051976928564	3.96299043049315	2.85505666962129	1.38806016450063	0.165118725406131
ENSG00000087152.14	1068.76572157862	-0.176426211279965	0.478158980811427	-0.368969774405518	0.712150254210794	0.890280144935603
ENSG00000087157.17	397.825966532346	-0.785216178912719	0.504373171823257	-1.55681591087457	0.119514198496778	0.403890973611542
ENSG00000087191.11	6733.37625158681	-0.397202254507265	0.529743685136641	-0.749800829442284	0.453374669133358	0.752621701063123
ENSG00000087206.15	430.031651107206	-0.759265752765729	0.410466597446773	-1.84976258114203	0.0643477762272806	0.294285276776366
ENSG00000087237.9	1613.58265569927	4.21245459380807	0.796005716979977	5.29199037638825	1.20992260741996e-07	1.63046465158903e-05
ENSG00000087245.11	924.341349775364	0.240778251085901	0.905552096117501	0.265891108991104	0.790323072699952	0.924360123623137
ENSG00000087250.7	86.8822693934516	-5.61971153297647	1.57960209407013	-3.55767541336709
ENSG00000087253.10	255.735881152099	-1.2740361011547	0.827008201593478	-1.54053623494893	0.123429697395612	0.41063419149734
ENSG00000087258.12	936.452112671749	3.23463245799954	0.735333493393036	4.39886457921839	1.08818699231051e-05	0.000622548900287263
ENSG00000087263.15	800.071467488073	-0.404762334080727	0.511618065137915	-0.791141598902723	0.428861366630182	0.735341721674866
ENSG00000087266.14	1796.95668194745	0.539775372227518	0.433617674332345	1.24481865979893	0.213198415487336	0.539141151673615
ENSG00000087269.14	1645.99298865718	0.259944083067986	0.432285747836444	0.601324666309231	0.547623763689226	0.810176963996007
ENSG00000087274.15	5056.26854243196	-0.146149541829844	0.423007678296483	-0.345500919554015	0.729717819084203	0.898386597981104
ENSG00000087299.10	373.970769959271	1.97045078488942	0.613708406297678	3.2107280341434	0.00132399174745859	0.0246526396714247
ENSG00000087301.7	219.392814564169	1.17026895104846	0.584555706223349	2.00198020238181	0.0452868608152127	0.242783230107945
ENSG00000087302.7	2987.51283279097	0.0280445350491312	0.483392866066901	0.0580160300612501	0.95373585989081	0.983857227736487
ENSG00000087303.15	75.3266039159518	2.09621224298423	0.844466989597964	2.4822903308301	0.0130540866098597	0.116312715847029
ENSG00000087338.4	599.802400204174	0.249688991811073	0.509747696294524	0.489828583093403	0.624255202772668	0.849846187221138
ENSG00000087365.13	5447.37196653412	-0.148888568389859	0.396926063592026	-0.375104035856137	0.707583095637858	0.888364107256334
ENSG00000087448.8	323.122274167215	-0.0229602384175194	0.440997901877795	-0.0520642803962407	0.95847747446033	0.985595657650139
ENSG00000087460.22	18959.0207588581	-0.319142992570428	0.498310405094181	-0.640450187890638	0.521879963364827	0.793982952414147
ENSG00000087470.16	682.96596185039	-0.0755455355111306	0.425293745647185	-0.177631428358228	0.859012440781764	0.950645399531078
ENSG00000087494.14	17.5668228437127	1.67855795212293	1.15061239130456	1.4588387582197	0.144609492209907	0.44686450860482
ENSG00000087495.15	12.0567573802607	3.29746818594323	1.08324630327087	3.04406133303801	0.00233407549801084	0.036963578105725
ENSG00000087502.16	1111.50370275063	0.481008262904048	0.579147377416567	0.830545525475236	0.406230419404893	0.718654205757384
ENSG00000087510.6	53.6725531167452	-4.28559960947744	1.41356127423311	-3.03177491319043	0.00243120420719515	0.0379477744455439
ENSG00000087586.16	262.027655817927	-2.21254883363924	0.531341554281858	-4.16408017744751	3.12610256365964e-05	0.00143071842717031
ENSG00000087589.15	66.7096613557965	0.628146015326442	0.511894343946972	1.22710091008842	0.219784665857055	0.54799873034705
ENSG00000087842.9	1730.72544829019	-1.38869069756949	0.656990097887133	-2.11371632850403	0.0345395030339276	0.20863510270229
ENSG00000087884.13	1076.32495961504	0.312948692444561	0.674147497213055	0.464213979490097	0.64249444649281	0.858960564888712
ENSG00000087903.11	290.146697493046	-2.13710680224128	0.780234920892693	-2.73905556520867	0.00616159587813332	0.0703959895587048
ENSG00000087995.14	488.964357714058	-0.730339506040833	0.415365639009279	-1.75830506293882	0.0786956166988595	0.328279196288878
ENSG00000088002.10	141.832006018987	-4.41570076534417	2.22649787888085	-1.9832494821705	0.0473395691973637	0.248687480219371
ENSG00000088035.14	415.125321693267	-0.193233035469735	0.550565276040323	-0.350972071576092	0.72560930089932	0.896362773575792
ENSG00000088038.16	858.598685800359	-0.440327040799483	0.393294536884439	-1.11958595786156	0.262890242206907	0.594465831121759
ENSG00000088053.10	7.43791060050443	0.345318059858811	1.43668990448933	0.240356710783427	0.810053734394155	0.932941483387504
ENSG00000088179.7	382.596730032446	0.631959501248804	0.512479944242201	1.23313996644937	0.217523548608292	0.544524161832872
ENSG00000088205.11	1545.75910025843	-0.199977659608362	0.484309206318086	-0.412913190580607	0.679670216519285	0.875694709062942
ENSG00000088247.14	2875.28218251348	-0.0293429196271519	0.525883709820738	-0.0557973542043244	0.955503242701328	0.984430442191153
ENSG00000088256.7	1800.94269653024	0.221769316745395	0.463607911775679	0.478355332410075	0.632397319891746	0.854396887927372
ENSG00000088280.17	570.692904602429	-0.148501742696784	0.4741617388563	-0.31318794944311	0.754137873190053	0.909778553045808
ENSG00000088298.11	1441.08937810715	0.197089430897248	0.461421711136872	0.427135148044183	0.669280893711505	0.870337602967229
ENSG00000088305.17	33.8755524516421	-0.18574764736662	0.699809537474229	-0.265426001533253	0.790681307943695	0.924360123623137
ENSG00000088320.3	24.5688772913482	-1.0950806315591	1.40835515915319	-0.777559995745355	0.436828452362284	0.740892117392632
ENSG00000088325.14	339.289675273573	-1.80425187099869	0.550043928927333	-3.28019595547076	0.00103735008925767	0.0204789331542624
ENSG00000088340.14	30.8291591085881	-1.55825829647965	1.22007411026075	-1.27718331482883	0.20153753620014	0.524662646127541
ENSG00000088356.5	645.799617957474	-0.892974583317936	0.462418691077939	-1.93109534832239	0.0534712621678612	0.265113246341381
ENSG00000088367.19	1672.63500052906	-0.570657456978764	1.18759042855653	-0.480517056433655	0.630859777906902	0.853576684399348
ENSG00000088386.14	986.418286514397	0.404956126596135	0.771876743664949	0.524638331080376	0.59983463493012	0.837487872386529
ENSG00000088387.16	511.177107610282	-0.171117053587531	0.571849531276228	-0.299234403857323	0.764761200714637	0.913602566227638
ENSG00000088448.13	1412.75209289274	0.315588402623746	0.484828349060339	0.650928113497071	0.515092892483357	0.790427346008718
ENSG00000088451.9	486.180715896506	0.501647699933939	0.738633830593659	0.679156138205519	0.497038935495206	0.778593433466593
ENSG00000088538.12	13.9546106152754	-2.80152540335083	1.19391459330921	-2.34650402889017	0.0189504613315258	0.146132286559362
ENSG00000088543.13	283.767159297128	-0.768347367295329	0.588949096598875	-1.30460742996714	0.192026556980087	0.513143020105921
ENSG00000088682.12	3415.02207180471	0.0947530615027656	0.528513569747108	0.17928217348914	0.85771614356832	0.950214943364903
ENSG00000088726.14	45.5487016270071	-3.17252211859516	0.837458367367688	-3.78827442917202	0.000151697235318681	0.00476988872097696
ENSG00000088727.11	173.238981586738	-0.77959668861012	0.56258502611507	-1.38574020356287	0.165826247191843	0.479186052543962
ENSG00000088756.11	19.0083702887372	-0.197532102628958	1.22693338794713	-0.160996598975486	0.872096079323524	0.955877480082491
ENSG00000088766.10	6364.30139384811	-0.398556072643385	0.629922943435653	-0.632706074285256	0.52692560244957	0.79758226881826
ENSG00000088782.4	0
ENSG00000088808.15	585.476458810355	-0.114599567668554	0.578128707778902	-0.198225007903225	0.842869022208019	0.944961053422136
ENSG00000088812.16	6190.67339542623	0.402938441625315	0.47572181714478	0.847004335524697	0.396992704888866	0.711478087334284
ENSG00000088826.16	522.929183499046	-2.85977750566509	0.55466305102873	-5.15588247740873	2.52439193570288e-07	2.96049769929782e-05
ENSG00000088827.11	734.313595205283	1.98562363685622	0.581200680008116	3.41641657547355	0.000634511017646277	0.0142508809926021
ENSG00000088832.13	4779.90008447139	-0.743578011983505	0.533780816370443	-1.39303996917616	0.163607704474033	0.475949685742642
ENSG00000088833.16	3645.2767245882	-0.709037851975255	0.453821528948725	-1.56237156403254	0.118200481958067	0.402013408454115
ENSG00000088836.11	19.8726593855829	-1.56490273870942	1.14994411865962	-1.36085111729905	0.173560744034759	0.489051625885465
ENSG00000088854.12	249.336350480325	0.00270979915639216	0.588138192429899	0.00460741912576124	0.996323824420912	0.998394609700988
ENSG00000088876.10	231.588962891499	-0.319783343177018	0.428662485800283	-0.746002633237207	0.455665824354565	0.754531990159957
ENSG00000088881.19	428.958958652362	0.141804972303299	0.642820834181443	0.220597971881031	0.825405480366312	0.936969206806534
ENSG00000088882.7	83.5427464667145	-2.79214451316128	0.84049008075435	-3.32204338527743	0.000893607980883128	0.0183248759482423
ENSG00000088888.16	2543.66503155239	-0.353106193756444	0.400112885732204	-0.882516425608892	0.377497601198132	0.696800064284046
ENSG00000088899.13	466.264007382001	0.190822018689715	0.458176587832981	0.416481382412485	0.677057787973069	0.874775707886559
ENSG00000088926.12	3792.51891482154	1.91775345388498	0.591258743130683	3.24350967518988	0.00118066800716375	0.0225094666813926
ENSG00000088930.7	1679.87398677298	0.316168170294871	0.461005584667476	0.685822863779239	0.492824816641436	0.775705689339277
ENSG00000088970.14	455.278933563675	-0.108636696374349	0.402642985100972	-0.269808988096753	0.787307207686527	0.923889928793901
ENSG00000088986.9	6131.29391921266	-1.48318723811218	0.500236312233598	-2.96497315736561	0.00302709341009504	0.0438423355309894
ENSG00000088992.16	452.955423658586	-1.78539835059747	0.860499771486927	-2.07483884337626	0.0380014732458571	0.220980960477651
ENSG00000089006.15	2567.64123879836	-0.0315868132602285	0.477410517965896	-0.0661627929665448	0.947248218750937	0.981855711634869
ENSG00000089009.14	23345.588739862	-0.25884630845199	0.476404995512509	-0.543332481586444	0.586900904009456	0.831448595832678
ENSG00000089012.13	36.8498051899244	0.326606506543702	0.553679990937708	0.589883166972611	0.555268980152278	0.814765034044625
ENSG00000089022.12	890.930070826956	-0.236298766914011	0.492861252106988	-0.47944277604261	0.63162366849001	0.854079595609801
ENSG00000089041.15	177.573094522962	0.93168137106084	0.669550391591509	1.39150298881351	0.16407295395092	0.476507940162486
ENSG00000089048.13	410.18874866703	-0.0471473798377066	0.556291599947214	-0.0847529961663637	0.93245776264645	0.976892522002167
ENSG00000089050.13	965.091421845755	0.861894629323369	0.531385124493375	1.62197733733157	0.104808200682596	0.377226065363237
ENSG00000089053.11	3558.62329391976	-0.318201410267085	0.441215339866806	-0.721192990169253	0.470790784049735	0.764713397525121
ENSG00000089057.13	3455.51820015996	1.30537061581099	0.650125868430284	2.00787367369765	0.0446567173823668	0.241313110916023
ENSG00000089060.10	1044.07122362519	0.280921793150649	0.629244692809345	0.446442848641976	0.655277387043597	0.864449060645872
ENSG00000089063.13	3842.15705736108	0.169772357611216	0.472558621729067	0.359262004341446	0.719399095639787	0.893615134761102
ENSG00000089091.15	25.6441061546167	0.222421514418993	0.62671692947435	0.354899483257212	0.722664895612289	0.894687745924815
ENSG00000089094.15	846.875243800014	0.0126784888311144	0.762599142997225	0.0166253646460766	0.986735489291864	0.995079702936549
ENSG00000089101.16	2.55017897246772	-3.54464086861794	2.10167756318629	-1.68657691869918	0.0916847332456856
ENSG00000089116.3	0.710951233266859	-2.76051242176839	3.28395371463181	-0.840606373186319	0.40056848717385
ENSG00000089123.14	128.386429565617	0.0862987914875665	0.503895354259377	0.171263320366206	0.864016720414129	0.952574153468415
ENSG00000089127.11	1602.73834513885	-0.0450054423207078	0.398722979712012	-0.112873961649299	0.910130479973893	0.971761362869763
ENSG00000089154.9	2644.59634113598	-0.556664313634412	0.406838791853839	-1.36826754178938	0.171228346770509	0.486262552430444
ENSG00000089157.14	52557.3403877486	-0.536851030721322	0.457214701522634	-1.17417709652266	0.240324097886987	0.571154740689677
ENSG00000089159.14	1579.70116963633	0.028293060526179	0.391876400687073	0.0721989394527791	0.942443589166995	0.980430151621106
ENSG00000089163.4	138.240059826317	-0.601792177797745	0.500648171017565	-1.20202611861061	0.229353408843177	0.558134735156567
ENSG00000089169.13	3.11618567192482	1.07131468582798	1.73520211085003	0.617400520163713	0.536970579010147	0.803400709068627
ENSG00000089177.16	404.464647105737	0.495035664918009	0.447737304320117	1.1056386415461	0.268882957548198	0.60091518819177
ENSG00000089195.13	400.672800193367	-0.957204587768393	0.484834353494535	-1.97429200482425	0.0483485494883459	0.251309368080054
ENSG00000089199.8	233.200787972981	-6.4494534712239	2.60910966948515	-2.47189819065618
ENSG00000089220.4	85876.36279292	0.220946194205945	0.486472599547071	0.454180141721561	0.649699174833873	0.862216187935692
ENSG00000089225.18	1.32216193602712	-0.687549270518441	3.37728096859379	-0.203580713867795	0.838681165620787
ENSG00000089234.14	632.39922148156	-0.44200240768893	0.462433579719846	-0.955818147887761	0.339164117977353	0.664424803940103
ENSG00000089248.6	13818.8338639577	0.115181989869987	0.504565457220894	0.228279578440428	0.819428899497458	0.935701547552466
ENSG00000089250.17	14.36030311147	-0.43082310110299	1.16732815872368	-0.369067684937918	0.712077274945584	0.890240207284741
ENSG00000089280.17	3824.51965475113	-0.51970583615858	0.418009308472768	-1.24328771064302	0.213761831187793	0.539841309445973
ENSG00000089289.14	1442.91507252051	-0.364642355516849	0.504497390885117	-0.722783431797539	0.469812947901129	0.764326763472022
ENSG00000089327.13	1105.79100861918	0.0680394312634538	0.609834340986355	0.111570350651959	0.911164081959754	0.972003421723876
ENSG00000089335.19	518.883820666515	0.532955337768821	0.551901254996937	0.965671545305291	0.334208562246595	0.660802785610328
ENSG00000089351.13	973.090483971284	-1.09054743878793	0.582512072416644	-1.87214564371794	0.061186456747786	0.286414232050182
ENSG00000089356.15	127.856223579607	-1.04931424503149	1.29215738654446	-0.812063805816728
ENSG00000089472.15	144.924066394733	0.4628785000798	0.708135571666678	0.65365802623128	0.513332151052883	0.78943922789835
ENSG00000089486.15	2654.48880077285	-0.62860320857409	0.520580941215389	-1.20750330795151	0.227238371899358	0.556021689630696
ENSG00000089505.16	1.70923460643439	1.63531742437222	2.24228961745205	0.729306960012801	0.465813915778378
ENSG00000089558.7	12.9620217016792	-2.15510452142814	0.972258159806541	-2.21659700120898	0.026650642685514	0.179243740031504
ENSG00000089597.15	12877.1707567391	0.328638718453469	0.449798821104696	0.730634903947368	0.465002186451375	0.760492042608853
ENSG00000089639.9	306.247304906145	0.0325828566929306	0.519864162649733	0.0626757122992604	0.950024738137068	0.982536055888716
ENSG00000089682.15	197.838058833289	0.144252362128681	0.530862758187013	0.271731930530082	0.785828147740962	0.923367951957417
ENSG00000089685.13	459.67654796087	-3.79709739881559	0.605619033956106	-6.26977883111052	3.61561294636061e-10	1.0600586281654e-07
ENSG00000089692.7	140.737993268523	2.06579264119326	0.461046387456763	4.48066115990768	7.44121670722461e-06	0.000456058298530919
ENSG00000089693.9	11204.6200348678	0.379478690215243	0.411476814436882	0.922235899815086	0.356405541128117	0.67978639441031
ENSG00000089723.8	101.194224808448	-2.91869700375208	0.885391765962097	-3.29650344170586	0.000978964151474037	0.019684528480427
ENSG00000089737.14	3420.25704219145	-0.0826155465625797	0.50729849552219	-0.162853915972171	0.870633456052661	0.955595864952624
ENSG00000089775.10	261.628598700883	0.974479757789006	0.445500411172022	2.18738239820104	0.0287146200398932	0.187213906819653
ENSG00000089818.15	561.922930011813	0.632174204779998	0.478876219212476	1.32012027203945	0.186794865457473	0.506414669838232
ENSG00000089820.14	1660.90370616263	-1.92537257440709	0.790248658909886	-2.43641359298611	0.0148337129624265	0.125961855401916
ENSG00000089847.11	242.050195279293	0.801085417214912	0.629045068345526	1.27349447206045	0.202842632918818	0.526423674616286
ENSG00000089876.10	639.03914357331	0.380282406255482	0.412125305485944	0.922734909003184	0.356145368986848	0.679708825258503
ENSG00000089902.9	650.715458931352	-0.202588484770178	0.524675468753772	-0.386121510981586	0.699406679409608	0.884852021486434
ENSG00000089916.16	316.481431492903	0.255097659416148	0.523677468399441	0.487127430163883	0.626168028767881	0.850345886846297
ENSG00000090006.16	1781.92351695367	0.0265982365990525	0.701840172919185	0.0378978542770239	0.969769123860632	0.989678609441158
ENSG00000090013.8	11674.6887890407	-0.190178938974	0.518983124124687	-0.366445323814245	0.714032804601535	0.890676467026871
ENSG00000090020.9	237.413824804179	0.326264236544817	0.511989608914483	0.637247770001739	0.523963466132514	0.795466151915545
ENSG00000090054.12	358.311043725614	1.40389032828459	0.574047928524358	2.44559776026615	0.0144612237601931	0.124208515717003
ENSG00000090060.16	3542.68878437905	0.37369642747021	0.49544078908886	0.754270612553836	0.450686744700701	0.750775461688145
ENSG00000090061.16	53.1410416477236	1.17680385952166	0.974849797574757	1.2071642856667	0.227368881532758	0.55608107921708
ENSG00000090097.19	965.9235269289	-1.02275113369734	0.460048890097114	-2.22313574864064	0.0262066477369654	0.177541302305714
ENSG00000090104.10	755.276825940348	0.401185396655517	0.818684797037471	0.490036456163916	0.624108101781652	0.8497426655949
ENSG00000090238.10	2027.38957498933	-0.105175980970493	0.525284244196	-0.200226795554235	0.841303211656986	0.944360231433385
ENSG00000090263.14	2049.00433867286	-0.277771234814022	0.499641182430444	-0.555941432735463	0.578250892926178	0.828328055587048
ENSG00000090266.11	5357.76786523581	0.0868477248490493	0.500656970711132	0.17346752353351	0.862283953332615	0.951869547430301
ENSG00000090273.12	6772.84647400878	-0.00553910951387406	0.515195452476329	-0.0107514720622045	0.991421731702256	0.996889553274883
ENSG00000090316.14	1306.06085685598	-0.345164329628153	0.427729770911885	-0.806968214749913	0.419684795933949	0.728689687707108
ENSG00000090339.7	1605.10512089803	-0.362648339735254	0.789271476999308	-0.459472247893701	0.64589507668199	0.86068096126465
ENSG00000090372.13	1099.08835590885	-0.0825754624133167	0.494319674949794	-0.16704870673356	0.86733172488511	0.954434423975824
ENSG00000090376.7	88.8228686818048	0.668647016381246	0.637941511850975	1.04813216252565	0.294577719874133	0.626941414459933
ENSG00000090382.5	3707.24378180285	-2.66745054546643	1.16247006115366	-2.29464021019103
ENSG00000090402.6	0.321594591222405	-1.59481751842203	4.02564364143877	-0.39616460384259	0.691983601656431
ENSG00000090432.6	1133.80894953548	0.100139739350913	0.412357236604134	0.242847052171533	0.808123884018779	0.932510147200905
ENSG00000090447.10	268.524648736309	-0.926981280532891	0.542175744990321	-1.70974317663259	0.0873133748093779	0.343062806427667
ENSG00000090470.13	400.882611972435	-0.259215447977361	0.436416209698582	-0.593963840519105	0.552536298166829	0.81264151161348
ENSG00000090487.9	4091.14594231359	0.0851038607743881	0.471925437136263	0.18033327741521	0.856890932294715	0.949793519077572
ENSG00000090512.10	6867.73927411312	1.90745788425294	1.06843520977363	1.78528175298255
ENSG00000090520.9	3828.78371932824	-1.26963864881509	0.511849431190647	-2.48049244845638	0.0131201042855676	0.116757088834977
ENSG00000090530.8	208.976842835029	1.85401176115176	0.513297520761349	3.61196321073555	0.000303887685292935	0.00825174871103319
ENSG00000090534.16	893.840305601332	0.0622885716007718	0.514933513751065	0.120964299151995	0.903719312647302	0.970036296750425
ENSG00000090539.14	921.463519554361	0.59395936609586	0.496997398466335	1.19509552349516	0.232049710790186	0.561786817132902
ENSG00000090554.11	70.2836472344826	-0.199783085071415	0.63748013942632	-0.313394994942436	0.753980586302817	0.909707640997993
ENSG00000090565.14	1231.07743882086	0.164345457490656	0.438883506943189	0.374462596316999	0.70806017950428	0.888532665356484
ENSG00000090581.8	4468.73976068358	-0.43161418771414	0.439275631714409	-0.982558914159731	0.325824573904329	0.653879377988006
ENSG00000090612.19	441.634199661526	0.648856261397952	0.484549527569369	1.33909172226994	0.18054081493207	0.498157639675213
ENSG00000090615.11	1905.53822581769	-0.880555782402041	0.46058817431435	-1.911807188087	0.0559009294711037	0.272117246085947
ENSG00000090621.12	4869.99608519006	-0.198186355034684	0.574529928830681	-0.344953926835534	0.730129008157106	0.89842478726938
ENSG00000090659.16	199.626120708705	0.572932437933869	0.552876667451545	1.03627530634413	0.300073722986141	0.632261774682656
ENSG00000090661.10	4066.71058825133	0.0296540962498092	0.720884453560992	0.0411357133633903	0.967187703541637	0.989023161429012
ENSG00000090674.14	1265.01424612529	-0.540449663130605	0.51579243916473	-1.04780454712714	0.294728667083116	0.626966679187693
ENSG00000090686.14	792.987387745436	0.879889286552058	0.438972785442147	2.00442787282544	0.0450242460458304	0.242279162175946
ENSG00000090776.5	965.387881643888	-0.113429771487047	0.559922345856541	-0.202581254930142	0.839462342603493	0.943253197650314
ENSG00000090857.12	610.196928022068	0.15028793708182	0.70053019512408	0.214534559863192	0.830130219401879	0.938633794045402
ENSG00000090861.14	7792.01380083246	-0.942610584636327	0.548296086285236	-1.71916343781079	0.0855846162399985	0.340904605696196
ENSG00000090863.10	3553.42754490738	0.0131432647878301	0.560697320610444	0.0234409266902162	0.981298559187383	0.993571660450321
ENSG00000090889.11	102.581697145172	-3.32088917455123	0.633571518557135	-5.24153797524557	1.59243694858687e-07	1.97425783065947e-05
ENSG00000090905.16	1074.14513782714	0.787112688485052	0.514735923931553	1.52915825744798	0.126225215938799	0.415901449639606
ENSG00000090924.13	263.454978928399	-0.573049655432716	0.515912275520416	-1.11075018491208	0.266675894147188	0.598574162433639
ENSG00000090932.9	1.10178850861864	-0.769630151247838	2.62108074157335	-0.293630844346236	0.769040003838262
ENSG00000090971.4	301.175028071015	-1.17798204969124	0.63950235553053	-1.84202925838168	0.0654708702485267	0.297415410576222
ENSG00000090975.11	889.428173789544	-0.155272906023245	0.598120105346997	-0.25960154931285	0.795171141116229	0.926265025068086
ENSG00000090989.16	396.626753938245	0.416809755296286	0.407387869236166	1.02312755673797	0.306247539298544	0.636810462335876
ENSG00000091009.7	530.907859183708	0.100931178604713	0.494314946884111	0.204183950416485	0.838209752871211	0.942639942933556
ENSG00000091010.4	0.291611125388766	-1.46954419630421	4.03624537951853	-0.364086931820658	0.71579309501417
ENSG00000091039.15	704.701664611289	0.784117364799462	0.49775998212929	1.57529209448539	0.11518903791782	0.396027055850194
ENSG00000091073.18	464.212649809264	-0.554822632197117	0.493166232259758	-1.12502153615595	0.260579908367198	0.591993894443428
ENSG00000091106.17	69.6130863151852	0.484861301491727	0.640054651129607	0.757531096190012	0.448731743230003	0.749532981839876
ENSG00000091127.12	257.415024858346	-0.625033435793743	0.56452933525039	-1.10717618512511	0.268217761816558	0.600108544949165
ENSG00000091128.11	3.46820694212035	0.181570912011241	1.3430361465187	0.13519435979582	0.892458206385061	0.964569754195989
ENSG00000091129.18	699.575904451697	-5.69459705075644	0.949243449874338	-5.99909017176816	1.98426154026733e-09	4.73082839314724e-07
ENSG00000091136.12	1175.09602118971	0.521162474409314	0.609044156247146	0.855705565948866	0.392160660742387	0.708731169968082
ENSG00000091137.10	14.7374022708655	-1.30572016945111	0.963502729301766	-1.35518056123966	0.175360036390562	0.491070335917393
ENSG00000091138.11	10.6720503725976	-0.331202716821076	0.996190018368057	-0.332469419201416	0.739534827584877	0.902939587870556
ENSG00000091140.11	3258.91853358001	0.522655093527615	0.414819724554079	1.25995718764207	0.207684806888763	0.531836065147193
ENSG00000091157.12	469.199307714396	0.798269830923457	0.43370329646109	1.84058972444327	0.0656817046964409	0.29787421929222
ENSG00000091164.11	3096.70288712147	-0.316786788182518	0.431095840282125	-0.734840744404309	0.462436489671386	0.758755356568887
ENSG00000091181.18	3.05212693232217	1.44024456597272	1.54557499585428	0.931850327441835	0.351413881293399	0.676340204898139
ENSG00000091262.13	6204.92797945213	0.793187535301787	0.610820859400631	1.29856000019401	0.194094972722174	0.515369542060983
ENSG00000091317.7	3219.09331790926	1.56731485070259	0.555886853404387	2.81948537027629	0.00481007235663725	0.059362531200001
ENSG00000091409.13	1659.4005679647	-2.08770687974917	0.641353953319343	-3.25515554857688	0.00113330276700417	0.0217849011769254
ENSG00000091428.16	689.419827824678	1.60909720638685	0.521575668661494	3.08506953653769	0.0020350456845454	0.0337040848640435
ENSG00000091436.15	1363.96591281377	0.58852377366938	0.555563195749394	1.05932822435353	0.289450325261697	0.621281584574374
ENSG00000091482.5	84.7770122794925	-4.17280849102963	0.904258572949738	-4.61461866755404	3.93817712110079e-06	0.000267845425766153
ENSG00000091483.6	10023.0527275803	0.538541718610701	0.505067918807605	1.06627583846965	0.286298968314684	0.618186944322788
ENSG00000091490.9	1084.86134941752	-1.18724034013543	0.80069466419879	-1.48276289729423	0.138137416984763	0.437301123564207
ENSG00000091513.13	433849.314599677	0.851729083460981	0.634262049814217	1.34286622337008	0.179315295189719	0.496290935634154
ENSG00000091527.14	4914.59596904465	-0.0887544480138342	0.450713046762877	-0.196920077311471	0.843890081875123	0.945497994477758
ENSG00000091536.15	24.9238954476014	1.04345066475404	0.70171519275375	1.48700024672291	0.137014745784064	0.435448014096464
ENSG00000091542.8	2865.78780544909	-0.00146745839449338	0.410378279033981	-0.00357586760670603	0.997146876525536	0.998807480137784
ENSG00000091583.9	309722.609603106	1.21141301531401	0.447401831970072	2.7076621702234	0.00677589572226712	0.0753896582514397
ENSG00000091592.14	778.652605630999	-2.38124230585867	1.02875512167407	-2.31468330576447
ENSG00000091622.14	111.272793657342	5.22407659379791	0.715305927285125	7.30327597539334	2.80844305609032e-13	1.48614586694965e-10
ENSG00000091640.6	2629.48694171513	-0.124744882190711	0.612796269164005	-0.203566647624816	0.838692158693681	0.942860514794451
ENSG00000091651.7	37.4513924844468	-1.22994617690511	0.713363553254526	-1.72415056992163	0.0846806648746663	0.339285633447971
ENSG00000091656.14	323.536932584665	1.3395933774052	0.844512897230881	1.58623199455883	0.112686692488916	0.39186576057694
ENSG00000091664.7	0.518175457971108	2.66290702498796	4.00862997855202	0.664293546482393	0.506502450678016
ENSG00000091704.8	1.5651371098192	0.797653762871424	1.8349782456341	0.434693852512558	0.66378466117351
ENSG00000091732.14	790.940398353029	-0.619495976210761	0.431032440838657	-1.43723747336839	0.150650528542846	0.456943082240402
ENSG00000091831.20	690.846515207456	3.24736618988436	1.02912099250829	3.15547560833396	0.00160236663803302	0.0284027341329775
ENSG00000091844.6	4.1581712986017	0.314028681091096	1.26799722719887	0.247657230122511	0.804399626476791	0.930921788334796
ENSG00000091879.12	117.12709411277	-1.55925529880822	0.518932039946525	-3.00473892297901	0.00265808901556298	0.0400855225425315
ENSG00000091947.8	1527.3004600952	-0.619808489680796	0.459532288349114	-1.34878115291415	0.177407270112511	0.494035185773461
ENSG00000091972.17	46.0716077977711	-1.98269647044486	0.800937814014466	-2.47546867653455	0.0133061433226147	0.117780603559298
ENSG00000091986.14	504.714512673175	-1.66608767953376	0.952530539604318	-1.7491173356246	0.0802707392320015	0.331408935942437
ENSG00000092009.9	8.96161253856484	-1.65874520220547	1.79514000938987	-0.924019961411949	0.355475923006833	0.679267714070482
ENSG00000092010.13	8266.20733358756	-0.055923496012662	0.487657519734322	-0.114677809219735	0.908700503545884	0.971446631681252
ENSG00000092020.9	397.927853183193	0.11677320627622	0.515123985692943	0.226689514601299	0.82066518102208	0.935844342618534
ENSG00000092036.15	624.777007763634	0.236488687928203	0.696295166441249	0.339638560377909	0.734128735546352	0.900254494461487
ENSG00000092051.15	32.4898872671999	-1.6868787829684	1.21225000949879	-1.3915271352861	0.164065637028022	0.476507940162486
ENSG00000092054.12	0.167460330899145	1.3708098361768	4.0804728567969	0.335943868341979	0.736913195371712
ENSG00000092067.5	1.92783050375662	-0.389229235961908	1.97995563930295	-0.196584826566588	0.844152445552593
ENSG00000092068.17	370.804391097043	2.01703239505259	0.483588776885562	4.17096610066678	3.03310985323973e-05	0.00139420235965867
ENSG00000092094.9	810.0150188589	0.309367828398878	0.569927906233909	0.542819232073026	0.587254270259408	0.831448595832678
ENSG00000092096.13	429.369352665133	-2.0601025652319	1.24990833385573	-1.64820291971082	0.0993110379045824	0.367813635776343
ENSG00000092098.15	210.105539471427	0.940888778676724	0.695029144807034	1.35374003479804	0.17581933073613	0.491646854064728
ENSG00000092108.19	954.698301635917	0.215376557885829	0.391602682433915	0.549987442749898	0.582327986469951	0.829982736666419
ENSG00000092140.13	151.753621304406	0.484497992357249	0.533328750078474	0.908441542455679	0.363644985766306	0.684805278290581
ENSG00000092148.11	2757.24837906676	1.06537251630884	0.598656656215818	1.77960522988784	0.0751405897204182	0.320374923623041
ENSG00000092199.16	7820.82410241401	-0.0840063116779256	0.386126165615581	-0.217561820872716	0.82777053442323	0.937822951166914
ENSG00000092200.11	26.4478089703642	2.06796055438478	0.82856536848819	2.49583271644337	0.0125661846741161	0.113033143735333
ENSG00000092201.8	1516.33386581873	0.168294964511874	0.445902238931655	0.377425699667027	0.705857271119893	0.887770725984787
ENSG00000092203.12	1669.96741367217	-0.0398313463076826	0.472134180244276	-0.0843644624226834	0.932766661402881	0.976892522002167
ENSG00000092208.15	134.078271859903	-0.459762720227332	0.515539552010296	-0.891808821330065	0.372495412670115	0.693466661514571
ENSG00000092295.10	19.0143889145957	1.60020396835964	0.974973881764897	1.64127880581062	0.100739553540161	0.37021363426571
ENSG00000092330.14	1095.42437840993	-0.222958631359356	0.60234528575259	-0.370150869664041	0.711270081057249	0.889949001073706
ENSG00000092345.12	0.319445460522831	0.409037163963165	4.0804728567969	0.100242589111168	0.920151735052521
ENSG00000092377.12	7.95725788304711	4.63583830030418	1.93768536656637	2.39246184147997	0.0167357682514847	0.136120099009099
ENSG00000092421.15	671.41952206431	-0.883400253536649	0.929988754876232	-0.949904231534732	0.342160916522429	0.667402970859536
ENSG00000092439.12	1379.85143631704	1.37317585685202	0.694576379704397	1.97699763046424	0.0480418980370311	0.250846486410456
ENSG00000092445.10	197.151305516561	-1.15346277371125	0.614744032443674	-1.87633016806379	0.0606099569803671	0.285148029504721
ENSG00000092470.10	81.2200626315712	-0.738992263782216	0.516620301276813	-1.43043597387833	0.152591929603633	0.460083345780804
ENSG00000092529.21	19.1267741086228	1.62264063112866	1.02759036164045	1.57907342429553	0.11431921657831	0.394633209687036
ENSG00000092531.8	835.297896841478	0.544967815820771	0.475212955815936	1.14678652833668	0.251469858300711	0.582831967278306
ENSG00000092607.12	705.700756674329	1.44582800995725	1.02196404022197	1.4147542898312	0.157140550524792	0.466278824590708
ENSG00000092621.10	6925.30543942619	1.40094873164227	0.647030789483634	2.16519639314275	0.0303726484494323	0.193756242504817
ENSG00000092758.14	291.426359617826	-0.955961909313198	1.08873175306982	-0.878050912557418	0.379916090051027	0.69818973232743
ENSG00000092820.16	3078.47846575295	-0.29810324013834	0.551522793770714	-0.5405093742368	0.58884579794181	0.832069716825942
ENSG00000092841.17	27277.7504462386	-0.0399419282817586	0.520368330043669	-0.0767570314634764	0.938816833769862	0.97915487640714
ENSG00000092847.9	776.643626059955	0.464174564371973	0.534117139007098	0.869050121167905	0.384819716880098	0.701777639525141
ENSG00000092850.10	3.43674417036656	0.851806243215323	1.82129843609189	0.467691744711051	0.640005045472162	0.85792706002867
ENSG00000092853.12	12.7303436653155	-1.97648804718697	0.977979818473825	-2.02099062767098	0.0432807353050304	0.236946463077956
ENSG00000092871.15	910.518866221495	0.190420113225993	0.633449327283075	0.300608280764499	0.763713216238886	0.913449826673783
ENSG00000092929.10	284.653268056519	1.16860103250837	0.522296432449393	2.23742870888095	0.0252583339284906	0.173663579847215
ENSG00000092931.10	727.872089692185	-0.61765475779847	0.52446692249327	-1.17768105348225	0.238923782989299	0.569511651578586
ENSG00000092964.15	1479.83839723423	-0.663350901718953	0.563590032185662	-1.17700964147007	0.239191658027561	0.569836632542655
ENSG00000092969.10	25.6742999171346	-0.297762622147128	0.809973245691983	-0.367620317993024	0.713156362606611	0.890676467026871
ENSG00000092978.9	177.373955604445	-0.316770963349406	0.570028468942759	-0.555710776931767	0.578408588099762	0.828363894216586
ENSG00000093000.17	1098.29507003832	0.178679122700276	0.405644115864022	0.440482471487819	0.659587704911912	0.86609059164612
ENSG00000093009.8	95.8893756319224	-1.96991143078669	0.640995610448103	-3.07320580465376	0.00211772382726439	0.0345459670348332
ENSG00000093010.10	7680.812967214	0.963231340447661	0.556786669410645	1.72998276245952	0.0836333550225384	0.33708141753093
ENSG00000093072.14	1271.81702995998	-0.034585772632592	0.590013545344256	-0.0586186078362187	0.95325588925744	0.983772048391258
ENSG00000093100.13	1.4652312788543	3.10610086602684	2.66104009612955	1.16725068162055	0.243109149016982
ENSG00000093134.12	733.930283084717	1.76334907958363	0.830228329036706	2.1239326796155	0.0336757732681585	0.205811148401681
ENSG00000093144.17	2297.44873209867	1.08968776024333	0.42564908557781	2.56006132085096	0.0104653695350959	0.100690313717712
[truncated: 58,489 more rows]
