# Supplementary material for: Identification of key genes and crucial pathways for major depressive disorder using peripheral blood samples and chronic unpredictable mild stress rat models
Source: PeerJ journal article supplement (doi:10.7717/peerj.11694), 2021-08-03
Supplement: The_raw_data_of_sucrose_preference_test.xlsx [file The_raw_data_of_sucrose_preference_test.xlsx]

## Sheet: Sheet1
Control	CUMS
76.87	39.77
88.67	69.57
68.98	45.65
92.65	66.76
74.87	43.76
86.25	39.76
67.98	45.98
59.56	36.98
80.36	40.24
88.98	36.75
79.887	36.98
69.9	46.76
